# Supplementary material
Source: publisher site journal article supplement (https://alpineentomology.pensoft.net/article/53489/download/suppl/31/)
Supplement: Supplementary file 1

## Sheet: Distributional data
Scientific name	Country	State	Locality	Latitude	Longitude	Altitude	Date	Males	Females	Recorded by	Collection	Origin of data	Plant species	Identified by
Osmia uncinata Gerstäcker, 1869	Austria	Burgenland	Schützengraben E Minihof-Liebau	46.88	16.08	370	1997-06-14	0	1	Gusenleitner, Josef	Oberösterreichisches Landesmuseum Linz	Oberösterreichisches Landesmuseum Linz		Schwarz, Maximilian
Osmia uncinata Gerstäcker, 1869	Austria	Kärnten	Bad Eisenkappel Oistra-Wöglhof	46.5022	14.6545	1000	1995-05-28	0	1	Röth, W.	Oberösterreichisches Landesmuseum Linz	Oberösterreichisches Landesmuseum Linz		Schwarz, Maximilian
Osmia uncinata Gerstäcker, 1869	Austria	Kärnten	Faak am See	46.5643	13.9081		1959-06-15	0	1	Ettinger	Zoologische Staatssammlung München (ZSM)	Schmidt, Stefan Zoologische Staatssammlung München (ZSM)		Haeseler, Volker
Osmia uncinata Gerstäcker, 1869	Austria	Kärnten	Farchtnersee	46.6842	13.4637		1984-06-15	1	0	Gusenleitner, Josef	Oberösterreichisches Landesmuseum Linz	Oberösterreichisches Landesmuseum Linz		Schwarz, Maximilian
Osmia uncinata Gerstäcker, 1869	Austria	Kärnten	Förolach E Hermagor	46.6285	13.4719		1982-07-10	0	1	Gusenleitner, Josef	Oberösterreichisches Landesmuseum Linz	Oberösterreichisches Landesmuseum Linz		Schwarz, Maximilian
Osmia uncinata Gerstäcker, 1869	Austria	Kärnten	Greuth SE Maria Elend/Rosart	46.5167	14.1	510	1999-05-10	0	1	Gusenleitner, Josef	Oberösterreichisches Landesmuseum Linz	Oberösterreichisches Landesmuseum Linz		Schwarz, Maximilian
Osmia uncinata Gerstäcker, 1869	Austria	Kärnten	Heiligenblut/Kräuterwand, Wegränder	47.0517	12.8087	1576	2019-07-26	0	1	Schoder, S.	Naturhistorischen Museum Wien (NHMW)	Zimmermann, Dominique Naturhistorischen Museum Wien (NHMW)		Schoder, S.
Osmia uncinata Gerstäcker, 1869	Austria	Kärnten	Kathreinkogel	46.5197	14.075		1949-04-15	1	0	Priesner, E.	Oberösterreichisches Landesmuseum Linz	Oberösterreichisches Landesmuseum Linz		Haeseler, Volker
Osmia uncinata Gerstäcker, 1869	Austria	Kärnten	Maria-Saaler-Berg	46.6681	14.3461		1950-05-21	2	2	Priesner, E.		Warncke, Klaus (1981): Die Bienen des Klagenfurter Beckens (Hymenoptera, Apidae)- Mit 37 Abbildungen – Carinthia II – 171_91: 275 - 348.
Osmia uncinata Gerstäcker, 1869	Austria	Kärnten	Maria-Saaler-Berg	46.6681	14.3461		1962-04-26	1	0	Priesner, E.	Oberösterreichisches Landesmuseum Linz	Oberösterreichisches Landesmuseum Linz		Haeseler, Volker
Osmia uncinata Gerstäcker, 1869	Austria	Kärnten	Oberschütt NE Arnoldstein	46.5667	13.7583		1999-05-13	0	1	Gusenleitner, Josef	Oberösterreichisches Landesmuseum Linz	Oberösterreichisches Landesmuseum Linz		Schwarz, Maximilian
Osmia uncinata Gerstäcker, 1869	Austria	Kärnten	Obir-Süd Weg Schaida-Sattel zur Obir-Alm	46.4885	14.468	1100	1991-07-08	0	1	Ebmer, Andreas Werner	Ebmer, Andreas Werner	Ebmer, Andreas Werner (personal communication)		Ebmer, Andreas Werner
Osmia uncinata Gerstäcker, 1869	Austria	Kärnten	SW St. Georgen am Längsee, Odvinskogel/Buchberg Großes Waldgebiet	46.7702	14.436	650	1995-05-22	0	1	Ebmer, Andreas Werner	Ebmer, Andreas Werner	Ebmer, Andreas Werner (personal communication)		Ebmer, Andreas Werner
Osmia uncinata Gerstäcker, 1869	Austria	Kärnten	W Lavamünd, Martinikogel/Kasbauer/Rabenstein ausgedehntes Waldgebiet	46.6668	14.85	700	1996-05-21	0	1	Ebmer, Andreas Werner	Ebmer, Andreas Werner	Ebmer, Andreas Werner (personal communication)		Ebmer, Andreas Werner
Osmia uncinata Gerstäcker, 1869	Austria	Kärnten	Waidisch-Gries	46.4982	14.3462		1963-06-12	0	1	Priesner, E.	Oberösterreichisches Landesmuseum Linz	Oberösterreichisches Landesmuseum Linz		Haeseler, Volker
Osmia uncinata Gerstäcker, 1869	Austria	Kärnten	Waidisch-Gries	46.4982	14.3462		1964-05-13	0	0			Warncke, Klaus (1981): Die Bienen des Klagenfurter Beckens (Hymenoptera, Apidae)- Mit 37 Abbildungen – Carinthia II – 171_91: 275 - 348.
Osmia uncinata Gerstäcker, 1869	Austria	Kärnten	Weg Federau (eine Ruine SW Villach) nach Oberschütt (mit Kiefern durchwachsen)	46.5728	13.7934	600	1991-07-12	0	1	Ebmer, Andreas Werner	Ebmer, Andreas Werner	Ebmer, Andreas Werner (personal communication)		Ebmer, Andreas Werner
Osmia uncinata Gerstäcker, 1869	Austria	Niederösterreich	Dürnstein/Loiben Waldsteppe	48.3949	15.5222	260	2006-05-04	0	1	Ebmer, Andreas Werner	Ebmer, Andreas Werner	Ebmer, Andreas Werner (personal communication)		Ebmer, Andreas Werner
Osmia uncinata Gerstäcker, 1869	Austria	Niederösterreich	Göstling a.d. Ybbs	47.8	14.93	600	1968-05-28	0	0	Ressl, Franz		Zoologisch Botanische Datenbank (ZOBODAT) des Oberösterreichischen Landesmuseums Linz		Franz Ressl, Purgstall a.d. Erlaf
Osmia uncinata Gerstäcker, 1869	Austria	Niederösterreich	Hollenstein an der Ybbs, Fahrlehen Trockenwiesen/Pinus-Waldrand	47.8067	14.8065	500	2012-04-26	0	1	Ebmer, Andreas Werner	Ebmer, Andreas Werner	Ebmer, Andreas Werner (personal communication)		Ebmer, Andreas Werner
Osmia uncinata Gerstäcker, 1869	Austria	Niederösterreich	Neunkirchen	47.7333	16.0833		1972-06-14	0	1	Gusenleitner, Josef	Oberösterreichisches Landesmuseum Linz	Zoologisch Botanische Datenbank (ZOBODAT) des Oberösterreichischen Landesmuseums Linz		Peters, D. S.
Osmia uncinata Gerstäcker, 1869	Austria	Niederösterreich	Retz, Niederösterreich	48.7589	15.9545		1936-06-21	0	1	Pittioni		http://pittioni.myspecies.info/		Schmidt
Osmia uncinata Gerstäcker, 1869	Austria	Niederösterreich	Rhodaun/Gießhübel	48.0973	16.2429		1924-05-18	0	1		Naturhistorischen Museum Wien (NHMW)	Zimmermann, Dominique Naturhistorischen Museum Wien (NHMW)		Alfken
Osmia uncinata Gerstäcker, 1869	Austria	Niederösterreich	Wiese W Ruine Kaja	48.8266	15.8823		2008-04-28	0	1	Neumayer , Johann		Neumayer, J. (2010): Aculeate Hymenopteren (ohne Ameisen) des Nationalparks Thayatal. In: Wissenschaftliche Mitteilungen aus dem niederösterreichischen Landesmuseum. Nationalpark Thayatal 10 Jahre Naturraumforschung. 21. Band. St. Pölten.		Neumayer , Johann
Osmia uncinata Gerstäcker, 1869	Austria	Oberösterreich	1,5 Km N Gerling	48.4375	14.075	470	1998-06-01	0	1	Ebmer, Andreas Werner	Ebmer, Andreas Werner	Ebmer, Andreas Werner (personal communication)		Ebmer, Andreas Werner
Osmia uncinata Gerstäcker, 1869	Austria	Oberösterreich	Engerwitzdorf	48.3444	14.442		1983-04-26	0	1	Gusenleitner, Josef	Oberösterreichisches Landesmuseum Linz - Warnke-Sammlung	Oberösterreichisches Landesmuseum Linz		Haeseler, Volker
Osmia uncinata Gerstäcker, 1869	Austria	Oberösterreich	Gallneukirchen	48.35	14.41		1969-07-05	0	1	Gusenleitner, Josef	Oberösterreichisches Landesmuseum Linz	Zoologisch Botanische Datenbank (ZOBODAT) des Oberösterreichischen Landesmuseums Linz		Schwarz, Maximilian
Osmia uncinata Gerstäcker, 1869	Austria	Oberösterreich	Gutau	48.41	14.61		1961-06-18	0	1	Gusenleitner, Josef	Oberösterreichisches Landesmuseum Linz	Zoologisch Botanische Datenbank (ZOBODAT) des Oberösterreichischen Landesmuseums Linz		Peters, D. S.
Osmia uncinata Gerstäcker, 1869	Austria	Oberösterreich	Haselgraben N Linz	48.37	14.29		1961-04-12	0	1	Gusenleitner, Josef	Gusenleitner, Josef	Zoologisch Botanische Datenbank (ZOBODAT) des Oberösterreichischen Landesmuseums Linz		Gusenleitner, Josef
Osmia uncinata Gerstäcker, 1869	Austria	Oberösterreich	Hörsching, Oedt	48.2122	14.2034		1985-05-12	0	1	Schwarz	Schwarz	Müller, Andreas (Database)		Müller, Andreas
Osmia uncinata Gerstäcker, 1869	Austria	Oberösterreich	Kleinzell b. Neufelden	48.45	13.99		1961-04-10	1	0	Gusenleitner, Josef	Oberösterreichisches Landesmuseum Linz	Oberösterreichisches Landesmuseum Linz		Schwarz, Maximilian
Osmia uncinata Gerstäcker, 1869	Austria	Oberösterreich	Marchtrenk	48.19	14.1		1965-05-02	1	0	Gusenleitner, Josef	Oberösterreichisches Landesmuseum Linz	Oberösterreichisches Landesmuseum Linz		Peters, D. S.
Osmia uncinata Gerstäcker, 1869	Austria	Oberösterreich	Obereichenbach SG Aigen	48.3311	14.393		1989-05-05	0	1	Tiefenthaler	Oberösterreichisches Landesmuseum Linz	Oberösterreichisches Landesmuseum Linz		Schwarz, Maximilian
Osmia uncinata Gerstäcker, 1869	Austria	Oberösterreich	Oberschlierbach	47.92	14.15		1966-07-10	0	1	Gusenleitner, Josef	Oberösterreichisches Landesmuseum Linz	Zoologisch Botanische Datenbank (ZOBODAT) des Oberösterreichischen Landesmuseums Linz		Schwarz, Maximilian
Osmia uncinata Gerstäcker, 1869	Austria	Oberösterreich	Reichenthal, Grasslmühle	48.5614	14.3544		1967-05-13	0	1	Ebmer, Andreas Werner	Ebmer, Andreas Werner	Ebmer, Andreas Werner (personal communication)		Peters
Osmia uncinata Gerstäcker, 1869	Austria	Oberösterreich	Riedegg N Gallneukirchen	48.3661	14.4062		1984-04-20	1	0	Gusenleitner, Josef	Oberösterreichisches Landesmuseum Linz	Oberösterreichisches Landesmuseum Linz		Schwarz, Maximilian
Osmia uncinata Gerstäcker, 1869	Austria	Oberösterreich	Zw. Rottenegg und Burgruine	48.3691	14.1382		1969-05-15	0	1	Ebmer, Andreas Werner	Ebmer, Andreas Werner	Ebmer, Andreas Werner (personal communication)		Ebmer, Andreas Werner
Osmia uncinata Gerstäcker, 1869	Austria	Salzburg	Fusch	47.22	12.82		1986-05-03	1	0			Schwarz M., Gusenleitner F. (1999): Weitere Angaben zur Bienenfauna Österreichs. Vorstudie zu einer Gesamtbearbeitung der Bienen Österreichs II. (Hymenoptera, Apidae). Entomofauna 20: 185-253.
Osmia uncinata Gerstäcker, 1869	Austria	Salzburg	Kitzstein	47.18	12.68		1984-06-20	0	1			Schwarz M., Gusenleitner F. (1999): Weitere Angaben zur Bienenfauna Österreichs. Vorstudie zu einer Gesamtbearbeitung der Bienen Österreichs II. (Hymenoptera, Apidae). Entomofauna 20: 185-253.
Osmia uncinata Gerstäcker, 1869	Austria	Steiermark	Admont, Steiermark	47.5732	14.4604			0	1	Franz		http://pittioni.myspecies.info/		Pittioni
Osmia uncinata Gerstäcker, 1869	Austria	Steiermark	E Feistritz, Gulsen-Süd,Pinus-Erica-Zone	47.2837	14.9207	800	2009-06-01	0	1	Ebmer, Andreas Werner	Ebmer, Andreas Werner	Ebmer, Andreas Werner (personal communication)		Ebmer, Andreas Werner
Osmia uncinata Gerstäcker, 1869	Austria	Steiermark	E Feistritz, Gulsen-West	47.2702	14.9012	675	2011-04-25	0	1	Ebmer, Andreas Werner	Ebmer, Andreas Werner	Ebmer, Andreas Werner (personal communication)		Ebmer, Andreas Werner
Osmia uncinata Gerstäcker, 1869	Austria	Steiermark	Loipersdorf, Trockenhang bei Therme	46.9852	16.1135	341	2002-05-10	0	1	Prosi, Rainer	Prosi, Rainer	Prosi, Rainer		Prosi, Rainer
Osmia uncinata Gerstäcker, 1869	Austria	Steiermark	Soboth, Stausee-Ost	46.6835	15.0362	1000	2014-04-22	3	0	Ebmer, Andreas Werner	Ebmer, Andreas Werner	Ebmer, Andreas Werner (personal communication)		Ebmer, Andreas Werner
Osmia uncinata Gerstäcker, 1869	Austria	Tirol	Fiss	47.05	10.6167	1440	1992-07-20	0	1	Gusenleitner, Josef	Oberösterreichisches Landesmuseum Linz	Oberösterreichisches Landesmuseum Linz		Schwarz, Maximilian
Osmia uncinata Gerstäcker, 1869	Austria	Tirol	Karres	47.2193	10.7793		00.00.1998	0	0	Stöckl, Petra		Stöckl, Petra (2000): Synopsis der Megachilinae Nord- und Südtirols (Österreich, Italien) (Hymenoptera: Apidae). – Berichte des naturwissenschaftlichen-medizinischen Verein Innsbruck – 87: 273 - 306.		Stöckl, Petra
Osmia uncinata Gerstäcker, 1869	Austria	Tirol	oberhalb Igls	47.2333	11.4149		00.00.1998	0	0	Pechlaner		Stöckl, Petra (2000): Synopsis der Megachilinae Nord- und Südtirols (Österreich, Italien) (Hymenoptera: Apidae). – Berichte des naturwissenschaftlichen-medizinischen Verein Innsbruck – 87: 273 - 306.
Osmia uncinata Gerstäcker, 1869	Austria	Tirol	oberhalb Stangensteig (bei Ibk.)	47.2738	11.3559	1000	00.00.1998	0	0	Stöckl, Petra		Stöckl, Petra (2000): Synopsis der Megachilinae Nord- und Südtirols (Österreich, Italien) (Hymenoptera: Apidae). – Berichte des naturwissenschaftlichen-medizinischen Verein Innsbruck – 87: 273 - 306.		Stöckl, Petra
Osmia uncinata Gerstäcker, 1869	Austria	Tirol	Osttitol, Iseltal	46.9134	12.6157			1	0	Kofler	Schwarz, M.	Müller, Andreas (Database)		Müller, Andreas
Osmia uncinata Gerstäcker, 1869	Austria	Tirol	Scheffau	47.5297	12.249		1987-07-13	0	1	Riemann		Stöckl, Petra (2000): Synopsis der Megachilinae Nord- und Südtirols (Österreich, Italien) (Hymenoptera: Apidae). – Berichte des naturwissenschaftlichen-medizinischen Verein Innsbruck – 87: 273 - 306.
Osmia uncinata Gerstäcker, 1869	Austria	Tirol	Unterberg (bei Ibk.),	47.2063	11.3904		00.00.1998	0	0	Stöckl, Petra		Stöckl, Petra (2000): Synopsis der Megachilinae Nord- und Südtirols (Österreich, Italien) (Hymenoptera: Apidae). – Berichte des naturwissenschaftlichen-medizinischen Verein Innsbruck – 87: 273 - 306.		Stöckl, Petra
Osmia uncinata Gerstäcker, 1869	Austria	Tirol	Unterpettnau W Zirl	47.2914	11.1589		1984-04-24	0	1	Gusenleitner, Josef	Oberösterreichisches Landesmuseum Linz	Oberösterreichisches Landesmuseum Linz		Schwarz, Maximilian
Osmia uncinata Gerstäcker, 1869	Austria	Tirol	Zirl	47.2734	11.2564		1965-06-02	0	1	Ebmer, Andreas Werner	Ebmer, Andreas Werner	Ebmer, Andreas Werner (personal communication)		Ebmer, Andreas Werner
Osmia uncinata Gerstäcker, 1869	Austria	Tirol	Zirl (Fragenstein), Ibk. (Kranebitten)	47.2789	11.2379		00.00.1996	0	0	Stöckl, Petra		Stöckl, Petra (2000): Synopsis der Megachilinae Nord- und Südtirols (Österreich, Italien) (Hymenoptera: Apidae). – Berichte des naturwissenschaftlichen-medizinischen Verein Innsbruck – 87: 273 - 306.		Stöckl, Petra
Osmia uncinata Gerstäcker, 1869	Austria	Wien	Wiener Teil des Bisamberges	48.3196	16.3917		1933-05-01	0	1	Roller, H.	Roller, H.	Roller, H. (1936): Faunistisch-ökologische Studien an den Lößwänden des Bisamberges. – Zur Morphologie und Ökologie der Tiere 31: 294-327.
Osmia uncinata Gerstäcker, 1869	Belgium	Antwerpen	Antwerp	51.3295	44.7123		2017-05-17	0	1		Natuurpunt	Global Biodiversity Information Facility
Osmia uncinata Gerstäcker, 1869	Belgium	Antwerpen	Brasschaat - Klein Schietveld	51.3512	4.49176		2013-07-01	0	1	Foquet R./Foquet B.		Rasmont, Pierre (personal communication)		Foquet R./Foquet B.
Osmia uncinata Gerstäcker, 1869	Belgium	Brabant Wallon	Couture-St-Germain	50.6711	4.47752		1948-05-15	0	1			Rasmont, Pierre (personal communication)		PAULY A
Osmia uncinata Gerstäcker, 1869	Belgium	Bruxelles	Foret De Soignes	50.7798	4.41002			2	3			Crevecoeur, A. & Marechal, P. (1937): Matériaux pour servir à l’établissement d’un nouveau catalogue des Hyménoptères de Belgique. VII. Bulletin & Annales de la Société entomologique de Belgique, 77: 445-456. [Apoidea]		Pauly, A.
Osmia uncinata Gerstäcker, 1869	Belgium	East Flanders		5115553	38937		2018-04-08	1	0			Natuurpunt
Osmia uncinata Gerstäcker, 1869	Belgium	Hainaut	Chimay	50.0523	4.31873		00.00.1911	1	1			Rasmont, Pierre (personal communication)		PAULY A
Osmia uncinata Gerstäcker, 1869	Belgium	Liège	Bilstain	50.6259	5.91836		1960-05-26	0	1			Rasmont, Pierre (personal communication)		Leclercq J
Osmia uncinata Gerstäcker, 1869	Belgium	Liège	Comblain-au-Pont	50.4667	5.58333		1950-05-10	0	1			Rasmont, Pierre (personal communication)		MarÚchal F
Osmia uncinata Gerstäcker, 1869	Belgium	Liège	Comblain-au-Pont	50.4722	5.5706		1950-05-10	0	1			Rasmont, Pierre (personal communication)		Leclercq J
Osmia uncinata Gerstäcker, 1869	Belgium	Liège	Comblain-au-Pont	50.4722	5.5706		10.05.0000	0	1			Marechal, P. (1958):- Parc naturel de la Lesse et Lomme. Botanique - Entomologie. Parcs Nationaux, 13: 133-141; 13: 168-175.		Leclercq J
Osmia uncinata Gerstäcker, 1869	Belgium	Liège	Fond D'Oxhe	50.5219	5.34756		20.04.1892	0	1			Rasmont, Pierre (personal communication)		Leclercq J
Osmia uncinata Gerstäcker, 1869	Belgium	Liège	Fond D'Oxhe	50.5219	5.34756		20.06.1892	0	1			Crevecoeur, A. & Marechal, P. (1932): Matériaux pour servir à l’établissement d’un nouveau catalogue des Hyménoptères de Belgique. II. Bulletin & Annales de la Société entomologique de Belgique, 72: 61-81. [Braconidae, Eumenidae, Vespidae, Sphecidae, Apidae]		Pauly, A.
Osmia uncinata Gerstäcker, 1869	Belgium	Liège	Foret	50.5861	5.70395		1933-05-21	0	2			Crevecoeur, A. & Marechal, P. (1935): Matériaux pour servir à l’établissement d’un nouveau catalogue des Hyménoptères de Belgique. V. Bulletin & Annales de la Société entomologique de Belgique, 75: 395-412.		Pauly, A.
Osmia uncinata Gerstäcker, 1869	Belgium	Liège	Fringshaus	50.6226	6.23605		1952-07-30	0	1			Rasmont, Pierre (personal communication)		PAULY A
Osmia uncinata Gerstäcker, 1869	Belgium	Liège	Libomont	50.4287	6.10538		1966-05-15	0	1			Rasmont, Pierre (personal communication)		PETIT J
Osmia uncinata Gerstäcker, 1869	Belgium	Liège	Libomont	50.4287	6.10538			2	3			Petit, J. (1969): Notes sur quelques Hyménoptères rares recoltés en Haute Belgique. Lambillionea, 67: 70-74.		Petit, J.
Osmia uncinata Gerstäcker, 1869	Belgium	Liège	Martinrive	50.4815	5.64293		1932-05-21	0	1			Rasmont, Pierre (personal communication)		Leclercq J
Osmia uncinata Gerstäcker, 1869	Belgium	Liège	Tihange	50.5211	5.31327		2016-05-13	0	1	Rousseau-Piot J.-S.		Rasmont, Pierre (personal communication)		Rousseau-Piot J.-S.
Osmia uncinata Gerstäcker, 1869	Belgium	Liège	Warsage	50.7375	5.76938		1943-06-13	0	1			Rasmont, Pierre (personal communication)		Leclercq J
Osmia uncinata Gerstäcker, 1869	Belgium	Limburg	Zelem	50.9763	5.09973		00.05.1930	0	1			Rasmont, Pierre (personal communication)		PAULY A
Osmia uncinata Gerstäcker, 1869	Belgium	Limburg	Zelem	50.9763	5.09973		00.06.1930	0	1			Crevecoeur, A. & Marechal, P. (1932): Matériaux pour servir à l’établissement d’un nouveau catalogue des Hyménoptères de Belgique. II. Bulletin & Annales de la Société entomologique de Belgique, 72: 61-81. [Braconidae, Eumenidae, Vespidae, Sphecidae, Apidae]		Pauly, A.
Osmia uncinata Gerstäcker, 1869	Belgium	Limburg	Zutendaal	50.931	5.56736		1982-05-12	0	1			Rasmont, Pierre (personal communication)		LEFEBER V
Osmia uncinata Gerstäcker, 1869	Belgium	Luxembourg	Barvaux	50.3479	5.4936		1970-06-14	0	2			Rasmont, Pierre (personal communication)		PETIT J
Osmia uncinata Gerstäcker, 1869	Belgium	Luxembourg	Barvaux	50.3479	5.4936		1970-06-21	0	2			Petit, J. (1971): Notes sur la faune entomologique du Grand-Duché de Luxembourg. Hyménoptères Aculéates. Lambillionea, 71: 15-20.		Petit, J.
Osmia uncinata Gerstäcker, 1869	Belgium	Luxembourg	Bihain	50.2443	5.77889		2010-06-04	1	0	Devalez J.		Rasmont, Pierre (personal communication)		Devalez J.
Osmia uncinata Gerstäcker, 1869	Belgium	Luxembourg	Botassart	49.8258	5.04945		00.05.1894	4	3			Crevecoeur, A. & Marechal, P. (1932): Matériaux pour servir à l’établissement d’un nouveau catalogue des Hyménoptères de Belgique. II. Bulletin & Annales de la Société entomologique de Belgique, 72: 61-81. [Braconidae, Eumenidae, Vespidae, Sphecidae, Apidae]		Pauly, A.
Osmia uncinata Gerstäcker, 1869	Belgium	Luxembourg	Botassart	49.8258	5.04945		09.04.1894	1	0			Rasmont, Pierre (personal communication)		Leclercq J
Osmia uncinata Gerstäcker, 1869	Belgium	Luxembourg	Botassart	49.8258	5.04945		11.05.1895	0	1			Rasmont, Pierre (personal communication)		Leclercq J
Osmia uncinata Gerstäcker, 1869	Belgium	Luxembourg	Botassart	49.8258	5.04945		30.04.1895	1	0			Rasmont, Pierre (personal communication)		Leclercq J
Osmia uncinata Gerstäcker, 1869	Belgium	Luxembourg	Botassart	49.8258	5.04945		31.03.1894	1	1			Rasmont, Pierre (personal communication)		Leclercq J
Osmia uncinata Gerstäcker, 1869	Belgium	Luxembourg	Botassart	49.8258	5.04945		31.05.1894	1	1			Rasmont, Pierre (personal communication)		Leclercq J
Osmia uncinata Gerstäcker, 1869	Belgium	Luxembourg	Buzenol	49.644	5.59597		1936-05-30	0	1			Crevecoeur, A. & Marechal, P. (1937): Matériaux pour servir à l’établissement d’un nouveau catalogue des Hyménoptères de Belgique. VII. Bulletin & Annales de la Société entomologique de Belgique, 77: 445-456. [Apoidea]		Pauly, A.
Osmia uncinata Gerstäcker, 1869	Belgium	Luxembourg	Juzaine	50.3891	5.46059		2H989.05.1971	0	1			Rasmont, Pierre (personal communication)		Leclercq J
Osmia uncinata Gerstäcker, 1869	Belgium	Luxembourg	Les ╔pioux: see ╔pioux	49.7667	5.28333		1977-07-15	0	1			Rasmont, Pierre (personal communication)		Leclercq J
Osmia uncinata Gerstäcker, 1869	Belgium	Luxembourg	Meix-Devant-Virton	49.6015	5.48298		1963-06-03	0	2			Rasmont, Pierre (personal communication)		PETIT J
Osmia uncinata Gerstäcker, 1869	Belgium	Luxembourg	Meix-Devant-Virton	49.6015	5.48298			2	3			Petit, J. (1969): Notes sur quelques Hyménoptères rares recoltés en Haute Belgique. Lambillionea, 67: 70-74.		Petit, J.
Osmia uncinata Gerstäcker, 1869	Belgium	Luxembourg	Morville	50.3399	5.53667		1964-05-10	0	1			Rasmont, Pierre (personal communication)		PETIT J
Osmia uncinata Gerstäcker, 1869	Belgium	Luxembourg	Morville	50.3399	5.53667			2	3			Petit, J. (1969): Notes sur quelques Hyménoptères rares recoltés en Haute Belgique. Lambillionea, 67: 70-74.		Petit, J.
Osmia uncinata Gerstäcker, 1869	Belgium	Luxembourg	Mousny	50.1044	5.60812		1968-07-07	0	1			Rasmont, Pierre (personal communication)		PETIT J
Osmia uncinata Gerstäcker, 1869	Belgium	Luxembourg	Mousny	50.1044	5.60812			2	3			Petit, J. (1969): Notes sur quelques Hyménoptères rares recoltés en Haute Belgique. Lambillionea, 67: 70-74.		Petit, J.
Osmia uncinata Gerstäcker, 1869	Belgium	Luxembourg	Ozo	50.3755	5.55264		1974-06-16	0	1			Rasmont, Pierre (personal communication)		Leclercq J
Osmia uncinata Gerstäcker, 1869	Belgium	Luxembourg	Tontelange	49.729	5.80867		1967-06-16	0	1			Rasmont, Pierre (personal communication)		Leclercq J
Osmia uncinata Gerstäcker, 1869	Belgium	Luxembourg	Wellin	50.0856	5.11647		1975-05-18	0	1			Rasmont, Pierre (personal communication)		PETIT J
Osmia uncinata Gerstäcker, 1869	Belgium	Namur	Ave-et-Auffe	50.112	5.14561		1963-06-03	0	1			Rasmont, Pierre (personal communication)		Leclercq J
Osmia uncinata Gerstäcker, 1869	Belgium	Namur	Belvaux	50.102	5.2011		1954-05-27	1	0			Marechal, P. & Petit, J. (1957):- Insectes intéressants récoltés par le « Cercle des Entomologistes liégeois ». Lambillionea, 57: 55-63.		PETIT J
Osmia uncinata Gerstäcker, 1869	Belgium	Namur	Carriere Du Bois De Fays	50.1019	4.66969		1991-05-12	1	0	Longo, F.		Claessens, C. (1992): Faunistique comparée et écologie des Hyménoptères Apoïdes de Treignes (Belgique, prov. de Namur). Mémoire Licence Sciences Zoologiques, Université de MonsHainaut, 101 pp. + Annexes.		Claessens, C.
Osmia uncinata Gerstäcker, 1869	Belgium	Namur	Carriere Du Bois De Fays	50.1019	4.66969		1991-07-23	0	1	Claessens, C.		Claessens, C. (1992): Faunistique comparée et écologie des Hyménoptères Apoïdes de Treignes (Belgique, prov. de Namur). Mémoire Licence Sciences Zoologiques, Université de MonsHainaut, 101 pp. + Annexes.		Claessens, C.
Osmia uncinata Gerstäcker, 1869	Belgium	Namur	Grande Tinaimont	50.1297	5.21825		1951-06-04	0	2			Rasmont, Pierre (personal communication)		MarÚchal F
Osmia uncinata Gerstäcker, 1869	Belgium	Namur	Han-Sur-Lesse	50.1292	5.18836		1951-06-04	0	2			Rasmont, Pierre (personal communication)		Leclercq J
Osmia uncinata Gerstäcker, 1869	Belgium	Namur	Han-Sur-Lesse	50.1292	5.18836		1953-06-29	0	1			Rasmont, Pierre (personal communication)		PETIT J
Osmia uncinata Gerstäcker, 1869	Belgium	Namur	Han-Sur-Lesse	50.1292	5.18836		1954-04-29	0	1			Rasmont, Pierre (personal communication)		Leclercq J
Osmia uncinata Gerstäcker, 1869	Belgium	Namur	la roche trouée (réserve naturelle)	50.0648	4.56031		2015-06-04	0	1	Reyniers, J.		Rasmont, Pierre (personal communication)		Reyniers J.
Osmia uncinata Gerstäcker, 1869	Belgium	Namur	Rocher Serin	50.1371	5.20575		1954-04-29	0	1			Rasmont, Pierre (personal communication)		MarÚchal F
Osmia uncinata Gerstäcker, 1869	Belgium		Blauwe Kei 314 FS5579	51.2317	5.22064		1997-06-05	0	1	Peeters, T.	Naturalis Biodiversity Center Leiden	Müller, Andreas (Database)		Müller, Andreas
Osmia uncinata Gerstäcker, 1869	Belgium		Kalmthoutse heide	51.4004	4.40857		2007-04-14	1	0	Smit, J. T.		Müller, Andreas (Database)		Müller, Andreas
Osmia uncinata Gerstäcker, 1869	Belgium		Malle	51.2968	4.6941		2009-05-24	0	1	Willems, Eddy	Willems, Eddy	Willems, E. (2010): Waarnemingen aan de Bosmetselbij (Osmia uncinata) te Malle. - Nieuwsbrief sectie Hymenoptera van de NEV, Bzzz 31: 37-38.		Willems, Eddy
Osmia uncinata Gerstäcker, 1869	Belgium		Spa, Theux GS028016	50.4927	5.86516		2002-06-01	0	1	Smit, J. T.		Müller, Andreas (Database)		Müller, Andreas
Osmia uncinata Gerstäcker, 1869	Czech Republic		62 km D1, Sedlice, Zruč nad Sázavou env.	49.6878	15.0928	400	00.05.2009	0	1	Farkač, J.	Straka, Jakub	Straka, Jakub (personel communication)
Osmia uncinata Gerstäcker, 1869	Czech Republic		Benzínov, Předonín, Roudnice nad Labem env.	50.4422	14.3433	160	2009-04-19	0	1	Batelka, J. ;Straka, Jakub	Straka, Jakub	Straka, Jakub (personel communication)
Osmia uncinata Gerstäcker, 1869	Czech Republic		Bohemia Center/Konopiste	49.7795	14.6566		1964-05-13	1	1	Tkalců, Borek	Oberösterreichisches Landesmuseum Linz	Oberösterreichisches Landesmuseum Linz		Tkalců, Borek
Osmia uncinata Gerstäcker, 1869	Czech Republic		Budějovice	48.9759	14.4786		1912-03-05	1	0	Haleda	Oberösterreichisches Landesmuseum Linz	Oberösterreichisches Landesmuseum Linz		Tkalců, Borek
Osmia uncinata Gerstäcker, 1869	Czech Republic		Čelákovice	50.1625	14.75		1943-05-09	0	1	Hofler	Oberösterreichisches Landesmuseum Linz	Oberösterreichisches Landesmuseum Linz		Tkalců, Borek
Osmia uncinata Gerstäcker, 1869	Czech Republic		Čelákovice	50.1636	14.7559		1957-05-16	0	0	Zdenek, Padr.	SEMC	Global Biodiversity Information Facility		Zanden
Osmia uncinata Gerstäcker, 1869	Czech Republic		CHKO Broumovsko, lom Rožmitál	50.5996	16,3742308E		1905-07-02	0	0	Mocek, B.	Bogusch, Petr	Bogusch, Petr (personal communication)		Bogusch, Petr
Osmia uncinata Gerstäcker, 1869	Czech Republic		CHKO Lužické hory, Chřibská	50.8632	14,4829700E		2013-06-13	0	0	Bogusch, Petr	Bogusch, Petr	Bogusch, Petr (personal communication)		Bogusch, Petr
Osmia uncinata Gerstäcker, 1869	Czech Republic		Chlum u Třeboně	48.9627	14.9265		00.05.1985	1	0	Kocourek	Oberösterreichisches Landesmuseum Linz	Oberösterreichisches Landesmuseum Linz		Tkalců, Borek
Osmia uncinata Gerstäcker, 1869	Czech Republic		Drevníky - JZ	49.7133	14.2662		29.4.-6.5.2016	0	0	Heneberg, P.	Bogusch, Petr	Bogusch, Petr (personal communication)		Bogusch, Petr
Osmia uncinata Gerstäcker, 1869	Czech Republic		Env de Prag	50.0916	14.4015			0	1	Pfleger	Oberösterreichisches Landesmuseum Linz	Oberösterreichisches Landesmuseum Linz		Tkalců, Borek
Osmia uncinata Gerstäcker, 1869	Czech Republic		Hojšín - J od J od Šibenného	49.6555	14.2814		29.4.-6.5.2016	0	0	Heneberg, P.	Bogusch, Petr	Bogusch, Petr (personal communication)		Bogusch, Petr
Osmia uncinata Gerstäcker, 1869	Czech Republic		Hradec Králové, PP Na Plachtě	50.1876	15,8579089E		2008-05-14	0	0	Bogusch, Petr	Bogusch, Petr	Bogusch, Petr (personal communication)		Bogusch, Petr
Osmia uncinata Gerstäcker, 1869	Czech Republic		Kamýk - lom	49.647	14.242		29.4.-6.5.2016	0	0	Heneberg, P.	Bogusch, Petr	Bogusch, Petr (personal communication)		Bogusch, Petr
Osmia uncinata Gerstäcker, 1869	Czech Republic		Klánovický les, Praha-Klánovice	50.0923	14.6836	260	1998-06-20	0	1	Straka, Jakub	Straka, Jakub	Straka, Jakub (personel communication)
Osmia uncinata Gerstäcker, 1869	Czech Republic		Kobyli, Breclav	48.9318	16.8884		1943-05-23	0	0	Balthasar, Vladimir	SEMC	Global Biodiversity Information Facility
Osmia uncinata Gerstäcker, 1869	Czech Republic		Majdalena	48.9607	14.8614		1992-05-15	0	1		Oberösterreichisches Landesmuseum Linz	Oberösterreichisches Landesmuseum Linz		Tkalců, Borek
Osmia uncinata Gerstäcker, 1869	Czech Republic		Mazelov-Záblatí, pískovna	49.0967	14.667		29.-30.5.2011	0	0	Heneberg, P.	Bogusch, Petr	Bogusch, Petr (personal communication)		Bogusch, Petr
Osmia uncinata Gerstäcker, 1869	Czech Republic		Mladošovice	48.9491	14.6951		1905-07-06	0	0	Heneberg, P.	Bogusch, Petr	Bogusch, Petr (personal communication)		Bogusch, Petr
Osmia uncinata Gerstäcker, 1869	Czech Republic		Moravia/Kolejní	49.2306	16.5735		1980-05-25	0	1	Kocourek	Oberösterreichisches Landesmuseum Linz	Oberösterreichisches Landesmuseum Linz		Tkalců, Borek
Osmia uncinata Gerstäcker, 1869	Czech Republic		NP Podyjí, Havraníky	48.8208	16.0075		27.-30.6.2001	0	0	Bogusch, Petr	Bogusch, Petr	Bogusch, Petr (personal communication)		Bogusch, Petr
Osmia uncinata Gerstäcker, 1869	Czech Republic		NPP Kleneč	50.3926	14.2487		10.-15.4.2009	0	0	Bogusch, Petr	Bogusch, Petr	Bogusch, Petr (personal communication)		Bogusch, Petr
Osmia uncinata Gerstäcker, 1869	Czech Republic		Odrau (Odry)	49.6639	17.8308			0	0			Dittrich, R. (1902): Verzeichnis der bisher in Schlesien aufgefundenen Hymenopteren. 1. Apidae – Zeitschrift für Entomologie Breslau – NF_28: 21 - 54.
Osmia uncinata Gerstäcker, 1869	Czech Republic		Okna, Doksy env., st. 1	50.5372	14.6746	300	11.-26.06.2013	0	1	Straka, Jakub	Straka, Jakub	Straka, Jakub (personel communication)		Straka, Jakub
Osmia uncinata Gerstäcker, 1869	Czech Republic		Okna, Doksy env., st. 1	50.5372	14.6746	300	7.-19.07.2013	0	1	Straka, Jakub	Straka, Jakub	Straka, Jakub (personel communication)		Straka, Jakub
Osmia uncinata Gerstäcker, 1869	Czech Republic		Okna, Doksy env., st. 5-7	50.5372	14.6746	300	26.06-7.07.2013	0	1	Straka, Jakub	Straka, Jakub	Straka, Jakub (personel communication)		Straka, Jakub
Osmia uncinata Gerstäcker, 1869	Czech Republic		Okna, Doksy env., st. 7	50.5372	14.6746	300	12.-20.05.2013	0	1	Straka, Jakub	Straka, Jakub	Straka, Jakub (personel communication)		Straka, Jakub
Osmia uncinata Gerstäcker, 1869	Czech Republic		Ořešín	49.2783	16.6061		1967-04-12	1	0	Tkalců, Borek	Oberösterreichisches Landesmuseum Linz	Oberösterreichisches Landesmuseum Linz		Tkalců, Borek
Osmia uncinata Gerstäcker, 1869	Czech Republic		PR Dlouholoučské stráně	49.708	16.646		2008-05-02	0	0	Bogusch, Petr	Bogusch, Petr	Bogusch, Petr (personal communication)		Bogusch, Petr
Osmia uncinata Gerstäcker, 1869	Czech Republic		Strakonice, Kuřidlo	49.2727	13.878		2000-04-22	0	0	Bogusch, Petr	Bogusch, Petr	Bogusch, Petr (personal communication)		Bogusch, Petr
Osmia uncinata Gerstäcker, 1869	Czech Republic		Třebíz - násep R7	50.2696	13.9908		1905-07-05	0	0	Heneberg, P.	Bogusch, Petr	Bogusch, Petr (personal communication)		Bogusch, Petr
Osmia uncinata Gerstäcker, 1869	Czech Republic		Troppau (Opava)	49.9381	17.9044			0	0			Dittrich, R. (1902): Verzeichnis der bisher in Schlesien aufgefundenen Hymenopteren. 1. Apidae – Zeitschrift für Entomologie Breslau – NF_28: 21 - 54.
Osmia uncinata Gerstäcker, 1869	Czech Republic		Újezd u Chocně	50.0217	16.1663		1905-07-06	0	0	Heneberg, P.	Bogusch, Petr	Bogusch, Petr (personal communication)		Bogusch, Petr
Osmia uncinata Gerstäcker, 1869	Czech Republic		Vyškov	49.278	16.9928		1965-05-15	0	2	Kocourek	Oberösterreichisches Landesmuseum Linz	Oberösterreichisches Landesmuseum Linz		Kocourek
Osmia uncinata Gerstäcker, 1869	Czech Republic		Vyškov	49.278	16.9928		1965-06-12	0	1	Kocourek	Oberösterreichisches Landesmuseum Linz	Oberösterreichisches Landesmuseum Linz		Kocourek
Osmia uncinata Gerstäcker, 1869	Czech Republic		Vyškov	49.278	16.9928		1965-06-24	0	3	Kocourek	Oberösterreichisches Landesmuseum Linz	Oberösterreichisches Landesmuseum Linz		Kocourek
Osmia uncinata Gerstäcker, 1869	Czech Republic		Vyškov	49.278	16.9928		1966-05-20	1	0	Kocourek	Oberösterreichisches Landesmuseum Linz	Oberösterreichisches Landesmuseum Linz		Kocourek
Osmia uncinata Gerstäcker, 1869	Czech Republic		Vyškov	49.278	16.9928		1968-04-14	1	0	Kocourek	Oberösterreichisches Landesmuseum Linz	Oberösterreichisches Landesmuseum Linz		Kocourek
Osmia uncinata Gerstäcker, 1869	Czech Republic		Vyškov	49.278	16.9928		1968-06-03	0	2	Kocourek	Oberösterreichisches Landesmuseum Linz	Oberösterreichisches Landesmuseum Linz		Kocourek
Osmia uncinata Gerstäcker, 1869	Czech Republic		Vyškov	49.278	16.9928		1969-05-09	2	1	Kocourek	Oberösterreichisches Landesmuseum Linz	Oberösterreichisches Landesmuseum Linz		Kocourek
Osmia uncinata Gerstäcker, 1869	Czech Republic		Vyškov	49.278	16.9928		1970-06-13	0	1	Kocourek	Oberösterreichisches Landesmuseum Linz	Oberösterreichisches Landesmuseum Linz		Kocourek
Osmia uncinata Gerstäcker, 1869	Czech Republic		Vyškov	49.278	16.9928		00.04.1974	1	0	Kocourek	Oberösterreichisches Landesmuseum Linz	Oberösterreichisches Landesmuseum Linz		Kocourek
Osmia uncinata Gerstäcker, 1869	Czech Republic		Vyškov	49.278	16.9928		00.05.64	3	14	Kocourek	Oberösterreichisches Landesmuseum Linz	Oberösterreichisches Landesmuseum Linz		Kocourek
Osmia uncinata Gerstäcker, 1869	Czech Republic		Županovice - vysílač	49.7093	14.287		29.4.-6.5.2016	0	0	Heneberg, P.	Bogusch, Petr	Bogusch, Petr (personal communication)		Bogusch, Petr
Osmia uncinata Gerstäcker, 1869	Denmark		Enderupskov, 2011 (SJ)	55.2844	8.94854		00.00.2011	0	0			the national red-list (https://bios.au.dk/raadgivning/natur/redlistframe/soeg-en-art/) Madsen, H. B., H. T., Schmidt & C. Rasmussen, 2016. Distriktskatalog over Danmarks bier (Hymenoptera, Apoidea). – Entomologiske Meddelelser 83: 43-72
Osmia uncinata Gerstäcker, 1869	Denmark		Håre Mose, 2009 (F),	55.3827	9.92839		00.00.2009	0	0			the national red-list (https://bios.au.dk/raadgivning/natur/redlistframe/soeg-en-art/) Madsen, H. B., H. T., Schmidt & C. Rasmussen, 2016. Distriktskatalog over Danmarks bier (Hymenoptera, Apoidea). – Entomologiske Meddelelser 83: 43-71
Osmia uncinata Gerstäcker, 1869	Denmark		Jydelejet på Møn, 2014 (LFM).	54.9915	12.5274		00.00.2014	0	0			the national red-list (https://bios.au.dk/raadgivning/natur/redlistframe/soeg-en-art/) Madsen, H. B., H. T., Schmidt & C. Rasmussen, 2016. Distriktskatalog over Danmarks bier (Hymenoptera, Apoidea). – Entomologiske Meddelelser 83: 43-73
Osmia uncinata Gerstäcker, 1869	Denmark		Svanninge Bakker, 2008 (F),	55.1302	10.2683		00.00.2008	0	0			the national red-list (https://bios.au.dk/raadgivning/natur/redlistframe/soeg-en-art/) Madsen, H. B., H. T., Schmidt & C. Rasmussen, 2016. Distriktskatalog over Danmarks bier (Hymenoptera, Apoidea). – Entomologiske Meddelelser 83: 43-70
Osmia uncinata Gerstäcker, 1869	Estonia	Jõgeva maakond	Sõõru 1 km NW	58.6505	26.8852		2011-06-01	0	1	Villu Soon		Database of Estonian zoological collections		Villu Soon
Osmia uncinata Gerstäcker, 1869	Estonia	Lääne-Viru maakond	Roostava	59.2111	26.6352		2001-07-04	0	1	Villu Soon		Database of Estonian zoological collections		Villu Soon
Osmia uncinata Gerstäcker, 1869	Estonia	Lääne-Viru maakond	Tusari küla	59.1706	23.6914		2019-05-16	1	0	Peeter Tarlap		Database of Estonian zoological collections		Peeter Tarlap
Osmia uncinata Gerstäcker, 1869	Estonia	Lääne-Viru maakond	Vaisi küla	59.1824	23.7427		2019-05-16	1	0	Peeter Tarlap		Database of Estonian zoological collections		Peeter Tarlap
Osmia uncinata Gerstäcker, 1869	Estonia	Saare maakond	Abruka	58.1588	22.5009		2017-07-25	0	1	Villu Soon		Database of Estonian zoological collections		Villu Soon
Osmia uncinata Gerstäcker, 1869	Estonia	Saare maakond	Ruhnu	57.7997	23.2625		2011-05-24	0	1	Villu Soon		Database of Estonian zoological collections		Villu Soon
Osmia uncinata Gerstäcker, 1869	Estonia	Saare maakond	Ruhnu, Limo	57.7994	23.2703		2011-05-24	1	0	Ilmar Süda		Database of Estonian zoological collections		Villu Soon
Osmia uncinata Gerstäcker, 1869	Estonia	Tartu maakond	Elva, lasketiir	58.2045	26.4207		2005-06-18	1	0	Villu Soon		Database of Estonian zoological collections		Villu Soon
Osmia uncinata Gerstäcker, 1869	Estonia	Tartu maakond	Ihaste	58.3498	26.7706		2009-07-30	0	1	Villu Soon		Database of Estonian zoological collections		Villu Soon
Osmia uncinata Gerstäcker, 1869	Estonia	Tartu maakond	Kahu, Palupõhja	58.4319	26.2414		2009-06-21	0	1	Villu Soon		Database of Estonian zoological collections		Villu Soon
Osmia uncinata Gerstäcker, 1869	Estonia	Tartu maakond	Kahu, Palupõhja	58.4319	26.2414		2009-06-29	0	1	Villu Soon		Database of Estonian zoological collections		Villu Soon
Osmia uncinata Gerstäcker, 1869	Estonia	Tartu maakond	Kahu, Palupõhja	58.4319	26.2414		2009-07-08	0	1	Villu Soon		Database of Estonian zoological collections		Villu Soon
Osmia uncinata Gerstäcker, 1869	Estonia	Tartu maakond	Kandiküla	58.3914	26.669		2005-06-06	1	0	Villu Soon		Database of Estonian zoological collections		Villu Soon
Osmia uncinata Gerstäcker, 1869	Estonia	Tartu maakond	Kandiküla	58.3914	26.669		2005-06-12	1	0	Villu Soon		Database of Estonian zoological collections		Villu Soon
Osmia uncinata Gerstäcker, 1869	Estonia	Tartu maakond	Paluküla	58.2508	26.9507		2012-06-02	0	1	Villu Soon		Database of Estonian zoological collections		Villu Soon
Osmia uncinata Gerstäcker, 1869	Estonia	Tartu maakond	Tartu (Dorpat)	58.3742	26.7279			0	0			Database of Estonian zoological collections		Jaan Luig
Osmia uncinata Gerstäcker, 1869	Estonia	Tartu maakond	Vehendi	58.2317	26.1564		2009-06-29	0	1	Villu Soon		Database of Estonian zoological collections		Villu Soon
Osmia uncinata Gerstäcker, 1869	Estonia	Viljandi maakond	Ainja	58.0505	25.6414		2018-05-07	1	0	Villu Soon | Piia-Liisa Koll | Serine Fahradyan		Database of Estonian zoological collections		Villu Soon
Osmia uncinata Gerstäcker, 1869	Estonia	Viljandi maakond	Sudiste	58.0921	25.6972		2018-05-07	1	0	Villu Soon | Piia-Liisa Koll | Serine Fahradyan		Database of Estonian zoological collections		Villu Soon
Osmia uncinata Gerstäcker, 1869	Estonia	Võru maakond	Pugestu	57.798	26.891		2000-06-10	0	1	Villu Soon		Database of Estonian zoological collections		Villu Soon
Osmia uncinata Gerstäcker, 1869	Finland		Ihattula	60.5512	21.6621		2005-04-27	0	0		Zoological Museum in Helsinki (MZH)	Global Biodiversity Information Facility		Paukkunen, Juho
Osmia uncinata Gerstäcker, 1869	Finland		Karstu	60.3325	24.0092		2001-06-29	0	0		Zoological Museum in Helsinki (MZH)	Global Biodiversity Information Facility		Paukkunen, Juho
Osmia uncinata Gerstäcker, 1869	Finland		Kirakka	60.1803	22.9887		2008-05-24	0	1		Zoological Museum in Helsinki (MZH)	Global Biodiversity Information Facility		Paukkunen, Juho
Osmia uncinata Gerstäcker, 1869	Finland		Nikun kallioketo	60.2072	23.814		2004-05-25	0	0		Zoological Museum in Helsinki (MZH)	Global Biodiversity Information Facility		Paukkunen, Juho
Osmia uncinata Gerstäcker, 1869	Finland		Perniö	60.1805	22.9888		2008-05-24	0	0	Paukkunen, Juho		Finnish Insect Database Virtala
Osmia uncinata Gerstäcker, 1869	Finland		Seili	60.2393	21.9663		2005-06-11	0	0		Zoological Museum in Helsinki (MZH)	Global Biodiversity Information Facility		Paukkunen, Juho
Osmia uncinata Gerstäcker, 1869	Finland			60.1246	22.9478		1948-07-05	0	0		Zoological Museum in Helsinki (MZH)	Global Biodiversity Information Facility		Paukkunen, Juho
Osmia uncinata Gerstäcker, 1869	Finland			60.1246	22.9478		1948-07-10	0	0		Zoological Museum in Helsinki (MZH)	Global Biodiversity Information Facility		Paukkunen, Juho
Osmia uncinata Gerstäcker, 1869	Finland			60.1246	22.9478		1957-06-12	0	0		Zoological Museum in Helsinki (MZH)	Global Biodiversity Information Facility		Paukkunen, Juho
Osmia uncinata Gerstäcker, 1869	Finland			60.1246	22.9478		1960-06-23	0	0		Zoological Museum in Helsinki (MZH)	Global Biodiversity Information Facility		Paukkunen, Juho
Osmia uncinata Gerstäcker, 1869	Finland			60.1246	22.9478		1960-07-07	0	0		Zoological Museum in Helsinki (MZH)	Global Biodiversity Information Facility		Paukkunen, Juho
Osmia uncinata Gerstäcker, 1869	Finland			60.1246	22.9478		1962-06-30	0	0		Zoological Museum in Helsinki (MZH)	Global Biodiversity Information Facility		Paukkunen, Juho
Osmia uncinata Gerstäcker, 1869	Finland			60.1622	21.4998		2007-01-01	0	0		Zoological Museum in Helsinki (MZH)	Global Biodiversity Information Facility		Paukkunen, Juho
Osmia uncinata Gerstäcker, 1869	Finland			60.2429	24.0174		1917-06-08	0	0		Zoological Museum in Helsinki (MZH)	Global Biodiversity Information Facility		Paukkunen, Juho
Osmia uncinata Gerstäcker, 1869	Finland			60.286	22.3847			0	0		Zoological Museum in Helsinki (MZH)	Global Biodiversity Information Facility		Paukkunen, Juho
Osmia uncinata Gerstäcker, 1869	Finland			60.4518	21.9971		1935-06-11	0	0		Zoological Museum in Helsinki (MZH)	Global Biodiversity Information Facility		Paukkunen, Juho
Osmia uncinata Gerstäcker, 1869	Finland			60.1545	19.5141		2006-06-11	0	1			Global Biodiversity Information Facility
Osmia uncinata Gerstäcker, 1869	Finland			60.1546	19.5141		2006-01-01	0	0		Zoological Museum in Helsinki (MZH)	Global Biodiversity Information Facility		Paukkunen, Juho
Osmia uncinata Gerstäcker, 1869	Finland			60.2536	19.6727			0	0		Zoological Museum in Helsinki (MZH)	Global Biodiversity Information Facility		Paukkunen, Juho
Osmia uncinata Gerstäcker, 1869	Finland			60.2685	20.2044		2004-07-01	0	0		Zoological Museum in Helsinki (MZH)	Global Biodiversity Information Facility		Paukkunen, Juho
Osmia uncinata Gerstäcker, 1869	Finland			60.5454	27.2702		1977-06-06	0	0		Zoological Museum in Helsinki (MZH)	Global Biodiversity Information Facility		Paukkunen, Juho
Osmia uncinata Gerstäcker, 1869	Finland		Joensuu	62.6151	29.6948		2015-06-18	0	0	Paappanen, Juuso		Finnish Insect Database Virtala
Osmia uncinata Gerstäcker, 1869	Finland		Juojärvi	62.5363	29.0465		2008-05-11	0	0	Karhu, Ali	Virtala.www_hymenoptera	Global Biodiversity Information Facility		Paukkunen, Juho
Osmia uncinata Gerstäcker, 1869	Finland		Kontiolahti	62.6421	29.8075		2009-06-08	0	0	Pajari, Mika		Finnish Insect Database Virtala
Osmia uncinata Gerstäcker, 1869	Finland		Kontiolahti	62.6607	29.6599		2016-07-03	0	1	Paappanen, Juuso		Finnish Insect Database Virtala
Osmia uncinata Gerstäcker, 1869	Finland		Korpivaara	62.5534	29.106		2007-05-29	0	0		Zoological Museum in Helsinki (MZH)	Global Biodiversity Information Facility		Raekunnas, Martti
Osmia uncinata Gerstäcker, 1869	Finland		Liperi	62.5092	29.0638		2008-06-14	0	1	Karhu, Ali		Finnish Insect Database Virtala
Osmia uncinata Gerstäcker, 1869	Finland		Liperi	62.5092	29.0638		2009-06-27	0	0	Karhu, Ali		Finnish Insect Database Virtala
Osmia uncinata Gerstäcker, 1869	Finland		Liperi	62.5364	29.0463		2008-05-11	0	0	Karhu, Ali		Finnish Insect Database Virtala
Osmia uncinata Gerstäcker, 1869	Finland		Liperi	62.5537	29.0864		2008-06-26	0	0	Karhu, Ali		Finnish Insect Database Virtala
Osmia uncinata Gerstäcker, 1869	Finland		Liperi	62.5618	29.1453		2008-05-17	0	0	Karhu, Ali		Finnish Insect Database Virtala
Osmia uncinata Gerstäcker, 1869	Finland		Liperi	62.6141	29.2465		2009-06-13	0	0	Karhu, Ali		Finnish Insect Database Virtala
Osmia uncinata Gerstäcker, 1869	Finland		Liperi	62.6316	29.4067		2010-05-20	0	1	Pajari, Mika		Finnish Insect Database Virtala
Osmia uncinata Gerstäcker, 1869	Finland		Liperi	62.6354	29.448		2009-05-29	0	0	Pajari, Mika		Finnish Insect Database Virtala
Osmia uncinata Gerstäcker, 1869	Finland		Liperi	62.6391	29.3654		2009-05-29	0	0	Karhu, Ali		Finnish Insect Database Virtala
Osmia uncinata Gerstäcker, 1869	Finland		Liperi	62.6618	29.6014		2014-06-06	0	0	Karhu, Ali		Finnish Insect Database Virtala
Osmia uncinata Gerstäcker, 1869	Finland		Ylämylly	62.614	29.538		2008-06-05	0	0		Zoological Museum in Helsinki (MZH)	Global Biodiversity Information Facility		Raekunnas, Martti
Osmia uncinata Gerstäcker, 1869	Finland		Ylämylly	62.6176	29.5588		2007-06-03	0	0	Karhu, Ali	Zoological Museum in Helsinki (MZH)	Global Biodiversity Information Facility		Raekunnas, Martti
Osmia uncinata Gerstäcker, 1869	Finland			63.2939	30.0874			0	0		Zoological Museum in Helsinki (MZH)	Global Biodiversity Information Facility		Paukkunen, Juho
Osmia uncinata Gerstäcker, 1869	Finland		Kontiosaari	61.5093	29.533			0	0		Zoological Museum in Helsinki (MZH)	Global Biodiversity Information Facility		Paukkunen, Juho
Osmia uncinata Gerstäcker, 1869	Finland		Melkoniemi, Peltolan niitty	61.5287	29.3775		2006-06-15	0	0		Zoological Museum in Helsinki (MZH)	Global Biodiversity Information Facility		Paukkunen, Juho
Osmia uncinata Gerstäcker, 1869	Finland		Parikkala	61.5237	29.3676		2014-06-08	0	0	Paukkunen, Juho		Finnish Insect Database Virtala
Osmia uncinata Gerstäcker, 1869	Finland		Parikkala	61.7877	30.0061		2014-07-11	0	0	Paukkunen, Juho		Finnish Insect Database Virtala
Osmia uncinata Gerstäcker, 1869	Finland		Parikkala, Uukuniemen kirkonkylä	61,78752	30.0063		2014-07-11	0	0	Paukkunen, Juho		Hymenoptera fennica
Osmia uncinata Gerstäcker, 1869	Finland			61.7707	29.9335		1965-06-25	0	0		Zoological Museum in Helsinki (MZH)	Global Biodiversity Information Facility		Paukkunen, Juho
Osmia uncinata Gerstäcker, 1869	Finland		Juuma	66.2697	29.3338		1962-07-04	0	0		Zoological Museum in Helsinki (MZH)	Global Biodiversity Information Facility		Paukkunen, Juho
Osmia uncinata Gerstäcker, 1869	Finland		Oulanka	66.3593	29.3422		1972-06-25	0	0		Zoological Museum in Helsinki (MZH)	Global Biodiversity Information Facility		Paukkunen, Juho
Osmia uncinata Gerstäcker, 1869	Finland			66.004	29.0891		1958-07-01	0	0		Zoological Museum in Helsinki (MZH)	Global Biodiversity Information Facility		Paukkunen, Juho
Osmia uncinata Gerstäcker, 1869	Finland			66.004	29.0891		1958-07-03	0	0		Zoological Museum in Helsinki (MZH)	Global Biodiversity Information Facility		Paukkunen, Juho
Osmia uncinata Gerstäcker, 1869	Finland			66.3593	29.3422		1983-07-27	0	0		Zoological Museum in Helsinki (MZH)	Global Biodiversity Information Facility		Paukkunen, Juho
Osmia uncinata Gerstäcker, 1869	Finland		Ingermaninkylä, Illmanin niityt	60.628	26.1109		2003-06-04	0	0		Zoological Museum in Helsinki (MZH)	Global Biodiversity Information Facility		Paukkunen, Juho
Osmia uncinata Gerstäcker, 1869	Finland		Luoma	60.1643	24.5652			0	0		Zoological Museum in Helsinki (MZH)	Global Biodiversity Information Facility		Paukkunen, Juho
Osmia uncinata Gerstäcker, 1869	Finland		Nevas	60.2894	25.4149		1996-06-28	0	0		Zoological Museum in Helsinki (MZH)	Global Biodiversity Information Facility		Paukkunen, Juho
Osmia uncinata Gerstäcker, 1869	Finland		Siikajärvi	60.254	24.5585		1961-05-28	0	0		Zoological Museum in Helsinki (MZH)	Global Biodiversity Information Facility		Paukkunen, Juho
Osmia uncinata Gerstäcker, 1869	Finland		Täktom	59.8456	23.08		2005-06-02	0	0		Zoological Museum in Helsinki (MZH)	Global Biodiversity Information Facility		Raekunnas, Martti
Osmia uncinata Gerstäcker, 1869	Finland		Tuusula	60.4287	25.0422		2015-05-27	0	0	Paukkunen, Juho		Finnish Insect Database Virtala
Osmia uncinata Gerstäcker, 1869	Finland		Tvärminne	59.8614	23.1586		1977-07-08	0	0		Zoological Museum in Helsinki (MZH)	Global Biodiversity Information Facility		Paukkunen, Juho
Osmia uncinata Gerstäcker, 1869	Finland		Tvärminne	59.8614	23.1586		1997-06-11	0	0		Zoological Museum in Helsinki (MZH)	Global Biodiversity Information Facility		Paukkunen, Juho
Osmia uncinata Gerstäcker, 1869	Finland			60.2601	24.9195			0	0		Zoological Museum in Helsinki (MZH)	Global Biodiversity Information Facility		Paukkunen, Juho
Osmia uncinata Gerstäcker, 1869	Finland			60.2628	25.1			0	0		Zoological Museum in Helsinki (MZH)	Global Biodiversity Information Facility		Paukkunen, Juho
Osmia uncinata Gerstäcker, 1869	Finland			60.2695	25.6418		2007-01-01	0	0		Zoological Museum in Helsinki (MZH)	Global Biodiversity Information Facility		Paukkunen, Juho
Osmia uncinata Gerstäcker, 1869	Finland			60.3592	25.638			0	0		Zoological Museum in Helsinki (MZH)	Global Biodiversity Information Facility		Paukkunen, Juho
Osmia uncinata Gerstäcker, 1869	Finland			60.4521	25.9976		1944-07-05	0	0		Insects	MZH		Paukkunen, Juho
Osmia uncinata Gerstäcker, 1869	Finland			60.4521	25.9976		1944-07-09	0	0		Insects	MZH		Paukkunen, Juho
Osmia uncinata Gerstäcker, 1869	Finland			60.4521	25.9976		1946-06-20	0	0		Insects	MZH		Paukkunen, Juho
Osmia uncinata Gerstäcker, 1869	Finland			60.4521	25.9976		1947-08-04	0	0		Insects	MZH		Paukkunen, Juho
Osmia uncinata Gerstäcker, 1869	Finland			60.4521	25.9976		1948-06-08	0	0		Insects	MZH		Paukkunen, Juho
Osmia uncinata Gerstäcker, 1869	Finland			60.4521	25.9976		1949-07-09	0	0		Insects	MZH		Paukkunen, Juho
Osmia uncinata Gerstäcker, 1869	Finland			60.4521	25.9976		1953-06-25	0	0		Insects	MZH		Paukkunen, Juho
Osmia uncinata Gerstäcker, 1869	Finland			60.4521	25.9976		1955-07-06	0	0		Insects	MZH		Paukkunen, Juho
Osmia uncinata Gerstäcker, 1869	Finland			60.4521	25.9976		1956-06-18	0	0		Insects	MZH		Paukkunen, Juho
Osmia uncinata Gerstäcker, 1869	Finland			60.4521	25.9976		1959-07-10	0	0		Insects	MZH		Paukkunen, Juho
Osmia uncinata Gerstäcker, 1869	Finland		Ilmajoki	62.7543	22.2273		2007-06-16	0	0	Mukkala, Veli-Matti		Finnish Insect Database Virtala
Osmia uncinata Gerstäcker, 1869	Finland		Ilmajoki	62.7731	22.3047		2013-05-25/31	0	1	Mukkala, Veli-Matti		Finnish Insect Database Virtala
Osmia uncinata Gerstäcker, 1869	Finland		Ilmajoki	62.7868	22.5763		1997-07-13	0	1	Mukkala, Veli-Matti		Finnish Insect Database Virtala
Osmia uncinata Gerstäcker, 1869	Finland			62.3134	21.3029			0	0		Zoological Museum in Helsinki (MZH)	Global Biodiversity Information Facility		Paukkunen, Juho
Osmia uncinata Gerstäcker, 1869	Finland		Vaala, Rokua	64,54966	26.5263		2005-07-06	0	0	Leinonen, Reima	Private insect collections	Private insect collections
Osmia uncinata Gerstäcker, 1869	Finland		Kokkola	64.0008	23.4188		2003-06-01/18	0	0	Ahola, Matti		Finnish Insect Database Virtala
Osmia uncinata Gerstäcker, 1869	Finland		Reisjärvi	63.6337	25.0325		2004-05-28	0	1	Ahola, Matti		Finnish Insect Database Virtala
Osmia uncinata Gerstäcker, 1869	Finland			63.71	22.6451		1948-05-29	0	0		Zoological Museum in Helsinki (MZH)	Global Biodiversity Information Facility		Paukkunen, Juho
Osmia uncinata Gerstäcker, 1869	Finland		Anianniemi	61.6265	27.3833		2001-06-22	0	0	Paukkunen, Juho	Zoological Museum in Helsinki (MZH)	Global Biodiversity Information Facility		Paukkunen, Juho
Osmia uncinata Gerstäcker, 1869	Finland		Heiska	61.5875	28.0042		2005-06-04	0	0		Zoological Museum in Helsinki (MZH)	Global Biodiversity Information Facility		Paukkunen, Juho
Osmia uncinata Gerstäcker, 1869	Finland		Lappeenranta	61.025	28.6337		2013-05-20	0	0	Raekunnas, Martti		Finnish Insect Database Virtala
Osmia uncinata Gerstäcker, 1869	Finland		Lietvesi	61.5339	27.9649		2002-07-10	0	0		Zoological Museum in Helsinki (MZH)	Global Biodiversity Information Facility		Paukkunen, Juho
Osmia uncinata Gerstäcker, 1869	Finland		Lietvesi	61.5339	27.9649		2003-07-22	0	0		Zoological Museum in Helsinki (MZH)	Global Biodiversity Information Facility		Paukkunen, Juho
Osmia uncinata Gerstäcker, 1869	Finland		Mikkeli	61.6719	27.1761		2009-05-29	0	1	Koponen, Martti		Finnish Insect Database Virtala
Osmia uncinata Gerstäcker, 1869	Finland		Mikkeli	61.6983	27.232		2009-05-16	0	0	Koponen, Martti		Finnish Insect Database Virtala
Osmia uncinata Gerstäcker, 1869	Finland			61.2521	28.7668		1948-06-17	0	0		Zoological Museum in Helsinki (MZH)	Global Biodiversity Information Facility		Paukkunen, Juho
Osmia uncinata Gerstäcker, 1869	Finland		Muhamäki	62.2858	29.0188		1996-05-21	0	0		Zoological Museum in Helsinki (MZH)	Global Biodiversity Information Facility		Paukkunen, Juho
Osmia uncinata Gerstäcker, 1869	Finland		Muhamäki	62.2858	29.0188		1996-06-18	0	0		Zoological Museum in Helsinki (MZH)	Global Biodiversity Information Facility		Paukkunen, Juho
Osmia uncinata Gerstäcker, 1869	Finland			62.6095	27.094		1959-07-05	0	0		Zoological Museum in Helsinki (MZH)	Global Biodiversity Information Facility		Paukkunen, Juho
Osmia uncinata Gerstäcker, 1869	Finland			62.8771	27.6844		1946-06-09	0	0		Zoological Museum in Helsinki (MZH)	Global Biodiversity Information Facility		Paukkunen, Juho
Osmia uncinata Gerstäcker, 1869	Finland			62.8771	27.6844		1954-05-09	0	0		Zoological Museum in Helsinki (MZH)	Global Biodiversity Information Facility		Paukkunen, Juho
Osmia uncinata Gerstäcker, 1869	Finland			62.8771	27.6844		1959-06-21	0	0		Zoological Museum in Helsinki (MZH)	Global Biodiversity Information Facility		Paukkunen, Juho
Osmia uncinata Gerstäcker, 1869	Finland			62.8771	27.6844		1959-07-11	0	0		Zoological Museum in Helsinki (MZH)	Global Biodiversity Information Facility		Paukkunen, Juho
Osmia uncinata Gerstäcker, 1869	Finland		Kuotila, Lanterin niitty	61.6221	22.9891		2001-06-28	1	0	Paukkunen, Juho	Zoological Museum in Helsinki (MZH)	Global Biodiversity Information Facility		Paukkunen, Juho
Osmia uncinata Gerstäcker, 1869	Finland		Teinilänkulma	61.1682	23.1399		2005-04-25	1	0	Vantanen, Pekka	Zoological Museum in Helsinki (MZH)	Global Biodiversity Information Facility		Paukkunen, Juho
Osmia uncinata Gerstäcker, 1869	Finland		Teinilänkulma	61.1682	23.1399		2005-05-21	0	0		Zoological Museum in Helsinki (MZH)	Global Biodiversity Information Facility		Paukkunen, Juho
Osmia uncinata Gerstäcker, 1869	Finland			61.3835	22.9729		1934-08-03	0	0		Zoological Museum in Helsinki (MZH)	Global Biodiversity Information Facility		Paukkunen, Juho
Osmia uncinata Gerstäcker, 1869	Finland		Hämeenlinna	61.0013	24.4181		2009-05-08	0	1	Raekunnas, Martti		Finnish Insect Database Virtala
Osmia uncinata Gerstäcker, 1869	Finland		Hämeenlinna	61.0905	24.2319		2011-05-21	0	1	Raekunnas, Martti		Finnish Insect Database Virtala
Osmia uncinata Gerstäcker, 1869	Finland		Hämeenlinna	61.1225	24.6681		2014-06-02	0	1	Raekunnas, Martti		Finnish Insect Database Virtala
Osmia uncinata Gerstäcker, 1869	Finland		Hämeenlinna	61.2224	24.7352		2009-05-30	0	1	Raekunnas, Martti		Finnish Insect Database Virtala
Osmia uncinata Gerstäcker, 1869	Finland		Hanhisuo	61.0495	23.9419		1980-05-31	0	0		Zoological Museum in Helsinki (MZH)	Global Biodiversity Information Facility		Valkeila, Erkki
Osmia uncinata Gerstäcker, 1869	Finland		Hattula	61.0798	24.3005		2013-06-18	0	1	Raekunnas, Martti		Finnish Insect Database Virtala
Osmia uncinata Gerstäcker, 1869	Finland		Heinola	61.3548	26.3135		2014-06-21	0	0	Raekunnas, Martti		Finnish Insect Database Virtala
Osmia uncinata Gerstäcker, 1869	Finland		Parola Maritanristi	61.0796	24.3005		2005-06-17	0	0		Zoological Museum in Helsinki (MZH)	Global Biodiversity Information Facility		Raekunnas, Martti
Osmia uncinata Gerstäcker, 1869	Finland		Räyskälän lentokeskus	60.7411	24.1079		2005-05-21	0	0		Zoological Museum in Helsinki (MZH)	Global Biodiversity Information Facility		Paukkunen, Juho
Osmia uncinata Gerstäcker, 1869	Finland		Teuro	61.0893	24.8374		2007-05-17	0	0		Zoological Museum in Helsinki (MZH)	Global Biodiversity Information Facility		Raekunnas, Martti
Osmia uncinata Gerstäcker, 1869	Finland			60.5972	23.8021		2007-01-01	0	0		Zoological Museum in Helsinki (MZH)	Global Biodiversity Information Facility		Paukkunen, Juho
Osmia uncinata Gerstäcker, 1869	Finland			60.8816	24.5107		1953-06-21	0	0		Zoological Museum in Helsinki (MZH)	Global Biodiversity Information Facility		Paukkunen, Juho
Osmia uncinata Gerstäcker, 1869	Finland			60.9713	24.5037		1949-01-01	0	0		Zoological Museum in Helsinki (MZH)	Global Biodiversity Information Facility		Paukkunen, Juho
Osmia uncinata Gerstäcker, 1869	Finland			60.9713	24.5037		1953-05-20	0	0		Zoological Museum in Helsinki (MZH)	Global Biodiversity Information Facility		Paukkunen, Juho
Osmia uncinata Gerstäcker, 1869	Finland			60.9713	24.5037		1957-06-16	0	0		Zoological Museum in Helsinki (MZH)	Global Biodiversity Information Facility		Paukkunen, Juho
Osmia uncinata Gerstäcker, 1869	Finland			60.9713	24.5037		1959-06-13	0	0		Zoological Museum in Helsinki (MZH)	Global Biodiversity Information Facility		Paukkunen, Juho
Osmia uncinata Gerstäcker, 1869	Finland			60.9713	24.5037		1962-06-16	0	0		Zoological Museum in Helsinki (MZH)	Global Biodiversity Information Facility		Paukkunen, Juho
Osmia uncinata Gerstäcker, 1869	Finland			60.9713	24.5037		1962-06-23	0	0		Zoological Museum in Helsinki (MZH)	Global Biodiversity Information Facility		Paukkunen, Juho
Osmia uncinata Gerstäcker, 1869	Finland			60.9713	24.5037		1966-06-10	0	0		Zoological Museum in Helsinki (MZH)	Global Biodiversity Information Facility		Paukkunen, Juho
Osmia uncinata Gerstäcker, 1869	Finland			60.9713	24.5037		1973-05-27	0	0		Zoological Museum in Helsinki (MZH)	Global Biodiversity Information Facility		Paukkunen, Juho
Osmia uncinata Gerstäcker, 1869	Finland			61.0574	24.3117		1955-06-24	0	0		Zoological Museum in Helsinki (MZH)	Global Biodiversity Information Facility		Paukkunen, Juho
Osmia uncinata Gerstäcker, 1869	Finland			61.0574	24.3117		1968-06-03	0	0		Zoological Museum in Helsinki (MZH)	Global Biodiversity Information Facility		Paukkunen, Juho
Osmia uncinata Gerstäcker, 1869	Finland			61.0574	24.3117		1972-06-11	0	0		Zoological Museum in Helsinki (MZH)	Global Biodiversity Information Facility		Paukkunen, Juho
Osmia uncinata Gerstäcker, 1869	Finland			61.0574	24.3117		1974-06-17	0	0		Zoological Museum in Helsinki (MZH)	Global Biodiversity Information Facility		Paukkunen, Juho
Osmia uncinata Gerstäcker, 1869	Finland			61.0574	24.3117		1975-05-18	0	0		Zoological Museum in Helsinki (MZH)	Global Biodiversity Information Facility		Paukkunen, Juho
Osmia uncinata Gerstäcker, 1869	Finland			61.0787	25.7925		2008-05-10	0	1		Zoological Museum in Helsinki (MZH)	Global Biodiversity Information Facility		Paukkunen, Juho
Osmia uncinata Gerstäcker, 1869	Finland			61.3263	24.2886		1970-06-25	0	0		Zoological Museum in Helsinki (MZH)	Global Biodiversity Information Facility		Paukkunen, Juho
Osmia uncinata Gerstäcker, 1869	Finland			61.3306	24.2789		1996-06-11	0	0		Zoological Museum in Helsinki (MZH)	Global Biodiversity Information Facility		Paukkunen, Juho
Osmia uncinata Gerstäcker, 1869	Finland			61.3306	24.2789		1999-05-20	0	0		Zoological Museum in Helsinki (MZH)	Global Biodiversity Information Facility		Paukkunen, Juho
Osmia uncinata Gerstäcker, 1869	Finland			61.3332	24.6618		1955-06-03	0	0		Zoological Museum in Helsinki (MZH)	Global Biodiversity Information Facility		Paukkunen, Juho
Osmia uncinata Gerstäcker, 1869	Finland			61.3332	24.6618		1959-05-10	0	0		Zoological Museum in Helsinki (MZH)	Global Biodiversity Information Facility		Paukkunen, Juho
Osmia uncinata Gerstäcker, 1869	Finland			61.3417	25.2218		2008-07-11	0	1		Zoological Museum in Helsinki (MZH)	Global Biodiversity Information Facility		Paukkunen, Juho
Osmia uncinata Gerstäcker, 1869	Finland			61.3481	24.2587		1993-06-27	0	0		Zoological Museum in Helsinki (MZH)	Global Biodiversity Information Facility		Paukkunen, Juho
Osmia uncinata Gerstäcker, 1869	Finland			61.4885	23.5231			0	0		Zoological Museum in Helsinki (MZH)	Global Biodiversity Information Facility		Paukkunen, Juho
Osmia uncinata Gerstäcker, 1869	Finland			61.5872	23.889		1936-05-17	0	0		Zoological Museum in Helsinki (MZH)	Global Biodiversity Information Facility		Paukkunen, Juho
Osmia uncinata Gerstäcker, 1869	Finland		Kaatamo	62.5536	29.0865		2008-06-26	0	1	Karhu, Ali	Virtala.www_hymenoptera	Global Biodiversity Information Facility		Paukkunen, Juho
Osmia uncinata Gerstäcker, 1869	Finland		Kaatamo	62.5617	29.1455		2008-05-17	0	1	Karhu, Ali	Virtala.www_hymenoptera	Global Biodiversity Information Facility		Paukkunen, Juho
Osmia uncinata Gerstäcker, 1869	Finland		Käsämä	62.639	29.3656		2009-05-29	0	1	Karhu, Ali	Virtala.www_hymenoptera	Global Biodiversity Information Facility		Paukkunen, Juho
Osmia uncinata Gerstäcker, 1869	Finland		Korpivaara	62.5534	29.106			0	0	Karhu, Ali	Virtala.www_hymenoptera	Global Biodiversity Information Facility		Raekunnas, Martti
Osmia uncinata Gerstäcker, 1869	Finland		Koukkelonvaara	62.6353	29.4482		2009-05-29	0	1	Pajari, Mika	Virtala.www_hymenoptera	Global Biodiversity Information Facility		Paukkunen, Juho
Osmia uncinata Gerstäcker, 1869	Finland		Kuopio	62.909	27.6817		1964-06-21	0	1	Elving	Oberösterreichisches Landesmuseum Linz	Oberösterreichisches Landesmuseum Linz		Tkalců, Borek
Osmia uncinata Gerstäcker, 1869	Finland		Lehmonsärkkä	62.642	29.8077		2009-06-08	0	1	Pajari, Mika	Virtala.www_hymenoptera	Global Biodiversity Information Facility		Paukkunen, Juho
Osmia uncinata Gerstäcker, 1869	Finland		Lkor, Sodankylä	67.3851	26.6116		2009-07-02	0	1	Raekunnas, Martti		Finnish Insect Database Virtala
Osmia uncinata Gerstäcker, 1869	Finland		Naurislampi	62.5091	29.064		2008-06-14	0	0	Karhu, Ali	Virtala.www_hymenoptera	Global Biodiversity Information Facility		Paukkunen, Juho
Osmia uncinata Gerstäcker, 1869	Finland		Naurislampi	62.5091	29.064		2009-06-27	0	1	Karhu, Ali	Virtala.www_hymenoptera	Global Biodiversity Information Facility		Paukkunen, Juho
Osmia uncinata Gerstäcker, 1869	Finland		Parikkala, Melkoniemi, Kallioniemi	61,52351	29.3677		2014-06-08	0	0	Paukkunen, Juho		Hymenoptera fennica
Osmia uncinata Gerstäcker, 1869	Finland		Särkisalo	60.1129	22.9536			0	1	Niemelai	Oberösterreichisches Landesmuseum Linz - Warnke-Sammlung	Oberösterreichisches Landesmuseum Linz		Haeseler, Volker
Osmia uncinata Gerstäcker, 1869	Finland		Siikajärvi	60.254	24.5585		1969-06-11	0	0		Zoological Museum in Helsinki (MZH)	Global Biodiversity Information Facility		Paukkunen, Juho
Osmia uncinata Gerstäcker, 1869	Finland		Siikakoski	62.614	29.2467		2009-06-13	0	1	Karhu, Ali	Virtala.www_hymenoptera	Global Biodiversity Information Facility		Paukkunen, Juho
Osmia uncinata Gerstäcker, 1869	Finland		Täcktom	59.856	22.9805		1955-06-03	0	0		Zoological Museum in Helsinki (MZH)	Global Biodiversity Information Facility		Paukkunen, Juho
Osmia uncinata Gerstäcker, 1869	Finland		Vasarankylä	60.6373	26.1654		2003-07-17	0	1	Paukkunen, Juho	Zoological Museum in Helsinki (MZH)	Global Biodiversity Information Facility		Paukkunen, Juho
Osmia uncinata Gerstäcker, 1869	Finland			59.8403	23.2056		2009-06-24	0	1			Global Biodiversity Information Facility
Osmia uncinata Gerstäcker, 1869	Finland			60.0594	23.8544		2004-06-10	0	1			Global Biodiversity Information Facility
Osmia uncinata Gerstäcker, 1869	Finland			60.0595	23.8543			0	0	Malinen, Pekka	Virtala.www_hymenoptera	Global Biodiversity Information Facility		Paukkunen, Juho
Osmia uncinata Gerstäcker, 1869	Finland			60.1467	22.297		2014-04-27	0	1			Global Biodiversity Information Facility
Osmia uncinata Gerstäcker, 1869	Finland			60.1545	19.5141		2011-01-01	0	1			Global Biodiversity Information Facility
Osmia uncinata Gerstäcker, 1869	Finland			60.1622	21.4999		2007-07-18	0	1			Global Biodiversity Information Facility
Osmia uncinata Gerstäcker, 1869	Finland			60.2625	25.4162		1974-06-18	0	0		Zoological Museum in Helsinki (MZH)	Global Biodiversity Information Facility		Paukkunen, Juho
Osmia uncinata Gerstäcker, 1869	Finland			60.2694	25.6419		2007-06-23	0	1			Global Biodiversity Information Facility
Osmia uncinata Gerstäcker, 1869	Finland			60.2694	25.6419		2013-06-04	0	1			Global Biodiversity Information Facility
Osmia uncinata Gerstäcker, 1869	Finland			60.3623	22.0108		1967-07-23	0	0		Zoological Museum in Helsinki (MZH)	Global Biodiversity Information Facility		Paukkunen, Juho
Osmia uncinata Gerstäcker, 1869	Finland			60.4285	25.0422		2015-05-27	0	1			Global Biodiversity Information Facility
Osmia uncinata Gerstäcker, 1869	Finland			60.5879	23.4379		1965-06-17	0	1			Global Biodiversity Information Facility
Osmia uncinata Gerstäcker, 1869	Finland			60.5971	23.8022		2007-07-03	0	1			Global Biodiversity Information Facility
Osmia uncinata Gerstäcker, 1869	Finland			60.7763	23.7844		1962-06-07	0	1			Global Biodiversity Information Facility
Osmia uncinata Gerstäcker, 1869	Finland			60.7763	23.7844		1962-07-30	0	1			Global Biodiversity Information Facility
Osmia uncinata Gerstäcker, 1869	Finland			60.7992	24.7477		2015-06-29	0	1			Global Biodiversity Information Facility
Osmia uncinata Gerstäcker, 1869	Finland			60.8614	23.5916		1963-06-03	0	1			Global Biodiversity Information Facility
Osmia uncinata Gerstäcker, 1869	Finland			60.8781	24.3269		2009-06-01	0	1			Global Biodiversity Information Facility
Osmia uncinata Gerstäcker, 1869	Finland			61.0249	28.6339		2013-05-20	0	1			Global Biodiversity Information Facility
Osmia uncinata Gerstäcker, 1869	Finland			61.0398	28.6921		2015-05-09	0	1			Global Biodiversity Information Facility
Osmia uncinata Gerstäcker, 1869	Finland			61.0398	28.6921		2016-05-06	0	1			Global Biodiversity Information Facility
Osmia uncinata Gerstäcker, 1869	Finland			61.0406	23.5724		1956-06-10	0	1			Global Biodiversity Information Facility
Osmia uncinata Gerstäcker, 1869	Finland			61.0787	25.7925			0	0	Salin, Tomi	Virtala.www_hymenoptera	Global Biodiversity Information Facility		Paukkunen, Juho
Osmia uncinata Gerstäcker, 1869	Finland			61.3417	25.2218			0	0	Salin, Tomi	Virtala.www_hymenoptera	Global Biodiversity Information Facility		Paukkunen, Juho
Osmia uncinata Gerstäcker, 1869	Finland			61.3546	26.3136		2014-06-21	0	1			Global Biodiversity Information Facility
Osmia uncinata Gerstäcker, 1869	Finland			61.5235	29.3677		2014-06-08	0	1			Global Biodiversity Information Facility
Osmia uncinata Gerstäcker, 1869	Finland			61.6982	27.2321		2009-05-16	0	1			Global Biodiversity Information Facility
Osmia uncinata Gerstäcker, 1869	Finland			61.7875	30.0063		2014-07-11	0	1			Global Biodiversity Information Facility
Osmia uncinata Gerstäcker, 1869	Finland			62.5617	29.1455		2016-07-07	0	1			Global Biodiversity Information Facility
Osmia uncinata Gerstäcker, 1869	Finland			62.6079	26.3152		2016-01-01	0	1			Global Biodiversity Information Facility
Osmia uncinata Gerstäcker, 1869	Finland			62.617	29.763		2015-06-18	0	1			Global Biodiversity Information Facility
Osmia uncinata Gerstäcker, 1869	Finland			62.6613	29.6211		2014-06-06	0	1			Global Biodiversity Information Facility
Osmia uncinata Gerstäcker, 1869	Finland			62.7318	31.0075		1994-05-25	0	1			Global Biodiversity Information Facility
Osmia uncinata Gerstäcker, 1869	Finland			62.7542	22.2272		2007-06-16	0	1			Global Biodiversity Information Facility
Osmia uncinata Gerstäcker, 1869	Finland			63.0702	29.836		2010-05-14	0	1			Global Biodiversity Information Facility
Osmia uncinata Gerstäcker, 1869	Finland			64.0008	23.4187		2003-06-01	0	2			Global Biodiversity Information Facility
Osmia uncinata Gerstäcker, 1869	Finland			65.5089	26.1211		2016-06-24	0	1			Global Biodiversity Information Facility
Osmia uncinata Gerstäcker, 1869	Finland			68.4317	28.58		2015-06-25	0	1			Global Biodiversity Information Facility
Osmia uncinata Gerstäcker, 1869	France	Alpes de Haute-Provence	Col du Fam	44.0157	6.7137	1300	1992-05-07	1	0	Risch, Stephan	Risch, Stephan	Müller, Andreas (Database)		Müller, Andreas
Osmia uncinata Gerstäcker, 1869	France	Alpes de Haute-Provence	Larche - Ubayette	44.4511	6.84226		2012-08-08	0	1	Le Goff, Gérard	Le Goff, Gérard	Le Goff, Gérard (personal communication)		Le Goff, Gérard
Osmia uncinata Gerstäcker, 1869	France	Alpes de Haute-Provence	Parc National du Mercantour	44.43	6.874			0	0	Bessiere, A. ; Bleomelen, A.		CardObs - UMS PatriNat		Matthieu Aubert (Non renseigné)
Osmia uncinata Gerstäcker, 1869	France	Alpes Maritimes	Entraunes	44.1883	6.74928		2013-06-12	1	0	Le Goff, Gérard	Le Goff, Gérard	Le Goff, Gérard (personal communication)		Le Goff, Gérard
Osmia uncinata Gerstäcker, 1869	France	Alpes Maritimes	Entraunes	44.1883	6.74928		2013-06-13	1	0	Le Goff, Gérard	Le Goff, Gérard	Le Goff, Gérard (personal communication)		Le Goff, Gérard
Osmia uncinata Gerstäcker, 1869	France	Alpes Maritimes	Molinet - Col de Turini	43.9779	7.39123		2003-04-29	1	0	Le Goff, Gérard	Le Goff, Gérard	Le Goff, Gérard (personal communication)		Le Goff, Gérard
Osmia uncinata Gerstäcker, 1869	France	Alpes Maritimes	Col de Veillos	44.1039	7.18822		2010-07-15	0	0	Lair, Xavier (Non renseigné)		CardObs - UMS PatriNat		Le Goff Gérard 2011 (Non renseigné)
Osmia uncinata Gerstäcker, 1869	France	Ardennes	Ardennes: Vendresse	49.6053	4.79399		00.00.1931	0	0			Benoist, R. (1931): Les osmies de la faune française (Hymenopt. Apidae). Annales de la Société Entomologique de France, 100, 23-60
Osmia uncinata Gerstäcker, 1869	France	Haute-Marne	Chalmessin	47.7035	5.06972		2002-05-09	0	1	Le Goff, Gérard	Le Goff, Gérard	Le Goff, Gérard (personal communication)		Le Goff, Gérard
Osmia uncinata Gerstäcker, 1869	France	Lozère	Gatuzières	44.185	3.85	900-1050	00.00.2019	1	1	Aubert, Matthieu	Aubert, Matthieu	Aubert, Matthieu (personal communication)		Aubert, Matthieu
Osmia uncinata Gerstäcker, 1869	France	Meuse	between la Cheppe and Nettancourt	48.9649	4.69391		1974-05-15	0	0	Baker, D. und Baker, P.	SEMC	Global Biodiversity Information Facility
Osmia uncinata Gerstäcker, 1869	France	Vaucluse	Vaucluse, Montjay	44.3789	5.60955		1990-06-04	0	1	Perraudin, W.	Oberösterreichisches Landesmuseum Linz - Warnke-Sammlung	Oberösterreichisches Landesmuseum Linz		Haeseler, Volker
Osmia uncinata Gerstäcker, 1869	France	Yonne	Vergigny (Forêt domaniale de Pontigny)	47.9379	3.69475		2008-05-03	0	1	Le Goff, Gérard	Le Goff, Gérard	Le Goff, Gérard (personal communication)		Le Goff, Gérard
Osmia uncinata Gerstäcker, 1869	France	Yvelines	Orgeval	48.9183	1.9693		2006-05-01	0	1	Le Goff, Gérard	Le Goff, Gérard	Le Goff, Gérard (personal communication)		Le Goff, Gérard
Osmia uncinata Gerstäcker, 1869	Germany	Baden-Württemberg	Aalen-Sportplatz VFR	48.8435	10.0759	460	2000-05-01	0	1	Koller, Thomas	Koller, Thomas	Wildbienen-Kataster Baden-Württemberg		Koller, T.
Osmia uncinata Gerstäcker, 1869	Germany	Baden-Württemberg	Blumberg/Riedböhringen/NSG Billibuk	47.8671	8.5235	810	2004-05-24	0	1	Rennwald, Klaus	Doczkal, Dieter	Rennwald, Klaus (personal communication)		Rennwald, Klaus
Osmia uncinata Gerstäcker, 1869	Germany	Baden-Württemberg	Breisach am Rhein	48.029	7.58825	189	00.05.1987	0	1	Westrich, Paul	Westrich, Paul	Wildbienen-Kataster Baden-Württemberg		Westrich, Paul
Osmia uncinata Gerstäcker, 1869	Germany	Baden-Württemberg	Büsingen am Hochrhein/Büsingen am Hochrhein/alte Grube	47.7118	8.67709	470	2005-06-20	0	1	Herrmann, Mike	Herrmann, Mike	Herrmann, Mike (personal communication)		Herrmann, Mike
Osmia uncinata Gerstäcker, 1869	Germany	Baden-Württemberg	Calmbach	48.7781	8.57827	380	1964-05-27	1	0		Naturkundemuseum Karlsruhe (SMNK)	Wildbienen-Kataster Baden-Württemberg		Westrich, Paul
Osmia uncinata Gerstäcker, 1869	Germany	Baden-Württemberg	Crailsheim-Ölhaus-besonnt. Waldweg in O-W-Ausricht.	49.1256	9.95861	464	2013-06-08	0	1	Prosi, Rainer	Prosi, Rainer	Wildbienen-Kataster Baden-Württemberg		Prosi, Rainer
Osmia uncinata Gerstäcker, 1869	Germany	Baden-Württemberg	Diefenbach-Neuhalde	49.0235	8.8705	360	1991-05-28	0	1	Schmid-Egger, Christian	Schmid-Egger, Christian	Wildbienen-Kataster Baden-Württemberg		Schmid-Egger, Christian
Osmia uncinata Gerstäcker, 1869	Germany	Baden-Württemberg	Dorfmerkingen-Straßenrand i. Gewann Wolfertsholz	48.8045	10.3038	580	1999-05-29	0	1	Prosi, Rainer	Prosi, Rainer	Wildbienen-Kataster Baden-Württemberg		Prosi, Rainer
Osmia uncinata Gerstäcker, 1869	Germany	Baden-Württemberg	Eggenstein	49.076	8.39276	104	1924-04-25	1	0	Leininger, H.	Naturkundemuseum Karlsruhe (SMNK)	Wildbienen-Kataster Baden-Württemberg		Leininger, H.
Osmia uncinata Gerstäcker, 1869	Germany	Baden-Württemberg	Faulenfürst	47.8088	8.21614	102	1995-07-09	0	1	Schmid-Egger, Christian	Schmid-Egger, Christian	Wildbienen-Kataster Baden-Württemberg		Schmid-Egger, Christian
Osmia uncinata Gerstäcker, 1869	Germany	Baden-Württemberg	Friedrichsfeld-Dossenwald	49.4413	8.55606	105	1996-05-08	1	0	Wesserling	Wesserling	Wildbienen-Kataster Baden-Württemberg		Schmid-Egger, C.
Osmia uncinata Gerstäcker, 1869	Germany	Baden-Württemberg	Friedrichstal	49.1065	8.48176	110	1919-07-05	0	1	Leininger, H.	Naturkundemuseum Kassel (NKAS)	Wildbienen-Kataster Baden-Württemberg		Westrich, Paul
Osmia uncinata Gerstäcker, 1869	Germany	Baden-Württemberg	Glatten-NSG Alte Egart N Glatten	48.4509	8.51373	600	00.00.1996	0	0	Treiber, Reinhold		Wildbienen-Kataster Baden-Württemberg		Treiber, Reinhold
Osmia uncinata Gerstäcker, 1869	Germany	Baden-Württemberg	Grißheim-Leinpfad, Rh-km 207,2; Mesobrom.	47.8854	7.56502	209	1998-05-08	0	1	Schwenninger, Hans	Schwenninger, Hans	Wildbienen-Kataster Baden-Württemberg		Schwenninger, Hans
Osmia uncinata Gerstäcker, 1869	Germany	Baden-Württemberg	Grißheim-Trockenaue	47.8783	7.56747	208	1990-04-02	1	0	Schmid-Egger, Christian	Schmid-Egger, Christian	Wildbienen-Kataster Baden-Württemberg		Schmid-Egger, Christian
Osmia uncinata Gerstäcker, 1869	Germany	Baden-Württemberg	Häfnerhaslach-Umgebung Häfnerhaslach sz9	49.0251	8.92109	300	1993-04-28	0	2	Schmid-Egger, Christian	Schmid-Egger, Christian	Wildbienen-Kataster Baden-Württemberg		Schmid-Egger, Christian
Osmia uncinata Gerstäcker, 1869	Germany	Baden-Württemberg	Hartheim-Leinpfad Rhein-km 213,0-213, 13	47.9329	7.58603	300	2005-05-19	0	1	Schanowski, Arno	Schanowski, Arno	Wildbienen-Kataster Baden-Württemberg		Schanowski, Arno
Osmia uncinata Gerstäcker, 1869	Germany	Baden-Württemberg	Hechingen	48.3539	8.96544		00.00.1984	0	1	Westrich, Paul	Westrich, Paul	Wildbienen-Kataster Baden-Württemberg		Westrich, Paul
Osmia uncinata Gerstäcker, 1869	Germany	Baden-Württemberg	Hohenhaslach-Umgebung Hohenhaslach so11	49.0024	9.02433	300	1993-05-17	0	1	Schmid-Egger, Christian	Schmid-Egger, Christian	Wildbienen-Kataster Baden-Württemberg		Schmid-Egger, Christian
Osmia uncinata Gerstäcker, 1869	Germany	Baden-Württemberg	Hohenhaslach-Umgebung Hohenhaslach so8	49.0024	9.02433	300	1994-05-05	1	2	Schmid-Egger, Christian	Schmid-Egger, Christian	Wildbienen-Kataster Baden-Württemberg		Schmid-Egger, Christian
Osmia uncinata Gerstäcker, 1869	Germany	Baden-Württemberg	Horb am Neckar	48.4462	8.6925	500	1983-04-20	0	1	Westrich, Paul	Westrich, Paul	Wildbienen-Kataster Baden-Württemberg		Westrich, Paul
Osmia uncinata Gerstäcker, 1869	Germany	Baden-Württemberg	Iffezheim/Iffezheim/Niederwald, ehem.Munitionsdepot	48.8301	8.16895	130	00.05.2013	0	1	Doczkal, Dieter	Doczkal, Dieter	Rennwald, Klaus (personal communication)		Doczkal, Dieter
Osmia uncinata Gerstäcker, 1869	Germany	Baden-Württemberg	Iffezheim-Sandgrube Südl d. Ortes, Waldrand und Wald (2)	48.8106	8.14549	122	2012-04-02	2	0	Burger, Ronald	Burger, Ronald	Wildbienen-Kataster Baden-Württemberg		Burger, Ronald
Osmia uncinata Gerstäcker, 1869	Germany	Baden-Württemberg	Ihlingen-Ihlinger Berg	48.4318	8.65427	510	1991-04-15	1	0	Schmid-Egger, Christian	Schmid-Egger, Christian	Wildbienen-Kataster Baden-Württemberg		Schmid-Egger, Christian
Osmia uncinata Gerstäcker, 1869	Germany	Baden-Württemberg	Ihlingen-Ihlinger Berg	48.4318	8.65427	510	00.00.1991	0	0	Treiber, Reinhold		Wildbienen-Kataster Baden-Württemberg		Treiber, Reinhold
Osmia uncinata Gerstäcker, 1869	Germany	Baden-Württemberg	Immendingen/Hintschingen/Waldrand NSG Hanfgarten	47.9291	8.68682	705	2019-06-27	0	1	Herrmann, Mike	Herrmann, Mike	Herrmann, Mike (personal communication)		Herrmann, Mike
Osmia uncinata Gerstäcker, 1869	Germany	Baden-Württemberg	Immendingen/Immendingen/alter Steinbruch	47.9357	8.75304	690	2015-05-12	0	1	Herrmann, Mike	Herrmann, Mike	Herrmann, Mike (personal communication)		Herrmann, Mike
Osmia uncinata Gerstäcker, 1869	Germany	Baden-Württemberg	Immendingen/Mauenheim/NSG Höwenegg und unmittelbare Umgebung	47.9152	8.74103	785	2019-07-03	0	1	Herrmann, Mike	Herrmann, Mike	Herrmann, Mike (personal communication)		Herrmann, Mike
Osmia uncinata Gerstäcker, 1869	Germany	Baden-Württemberg	Immendingen/Zimmern/Iltishalde	47.9381	8.71641	705	2019-06-27	0	1	Herrmann, Mike	Herrmann, Mike	Herrmann, Mike (personal communication)		Herrmann, Mike
Osmia uncinata Gerstäcker, 1869	Germany	Baden-Württemberg	Immendingen/Zimmern/Waldrand NSG Stäudlin	47.933	8.69483	700	2019-04-25	0	1	Herrmann, Mike	Herrmann, Mike	Herrmann, Mike (personal communication)		Herrmann, Mike
Osmia uncinata Gerstäcker, 1869	Germany	Baden-Württemberg	Immendingen/Zimmern/Waldrand NSG Stäudlin	47.933	8.69483	700	2019-06-02	0	1	Herrmann, Mike	Herrmann, Mike	Herrmann, Mike (personal communication)		Herrmann, Mike
Osmia uncinata Gerstäcker, 1869	Germany	Baden-Württemberg	Irndorf	48.0672	8.97452	840	1987-07-14	0	1	Zinnert, K.-P.	Zinnert, K.-P.	Wildbienen-Kataster Baden-Württemberg		Westrich, Paul
Osmia uncinata Gerstäcker, 1869	Germany	Baden-Württemberg	Friedrichstal bei Karlsruhe	49.1	8.46667		1929-07-05	0	0		NMOK	Global Biodiversity Information Facility
Osmia uncinata Gerstäcker, 1869	Germany	Baden-Württemberg	Käfertal-Käfertaler Wald N Käfertal	49.5415	8.51446	97	1996-04-15	1	0	Wesserling	Wesserling	Wildbienen-Kataster Baden-Württemberg		Schmid-Egger, C.
Osmia uncinata Gerstäcker, 1869	Germany	Baden-Württemberg	Kirchhofen	47.9167	7.75	250	1934-04-08	0	0		Leininger	Global Biodiversity Information Facility
Osmia uncinata Gerstäcker, 1869	Germany	Baden-Württemberg	Kirchhofen	47.9237	7.74342	250	1934-04-08	1	0	Leininger, H.	Naturkundemuseum Kassel (NKAS)	Wildbienen-Kataster Baden-Württemberg		Westrich, Paul
Osmia uncinata Gerstäcker, 1869	Germany	Baden-Württemberg	Konstanz	47.6635	9.17509	400	1993-05-25	0	1	Zinnert, K.-P.	Zinnert, K.-P.	Wildbienen-Kataster Baden-Württemberg		Schmid-Egger, C.
Osmia uncinata Gerstäcker, 1869	Germany	Baden-Württemberg	Konstanz	47.6782	9.16344	400	1952-04-29	0	1		Zoologische Staatssammlung München (ZSM)	Schmidt, Stefan Zoologische Staatssammlung München (ZSM)		Blösch, Manfred
Osmia uncinata Gerstäcker, 1869	Germany	Baden-Württemberg	Konstanz	47.6782	9.16344	400	1952-04-30	0	1		Zoologische Staatssammlung München (ZSM)	Schmidt, Stefan Zoologische Staatssammlung München (ZSM)		Blösch, Manfred
Osmia uncinata Gerstäcker, 1869	Germany	Baden-Württemberg	Konstanz-Umisried	47.691	9.17194	410	1993-05-27	0	2	Zinnert, K.-P.	Zinnert, K.-P.	Wildbienen-Kataster Baden-Württemberg		Schmid-Egger, C.
Osmia uncinata Gerstäcker, 1869	Germany	Baden-Württemberg	Markgröningen	48.9057	9.08226	310	1931-05-25	0	1	Schwammberger, K.-H.	Naturkundemuseum Stuttgart (SMNS)	Wildbienen-Kataster Baden-Württemberg		Schwammberger, K.-H.
Osmia uncinata Gerstäcker, 1869	Germany	Baden-Württemberg	Mühlhausen an der Enz-Kammerten	48.9419	8.88239	285	1990-05-01	0	1	Treiber, Reinhold	Treiber, Reinhold	Wildbienen-Kataster Baden-Württemberg		Schmid-Egger, C.
Osmia uncinata Gerstäcker, 1869	Germany	Baden-Württemberg	Münster-Waldrand NO	48.995	9.79746	380	2003-05-29	0	1	Prosi, Rainer	Prosi, Rainer	Wildbienen-Kataster Baden-Württemberg		Prosi, Rainer
Osmia uncinata Gerstäcker, 1869	Germany	Baden-Württemberg	Neuhausen-Waldrand vor dem NSG Schoren	47.8386	8.78511	560	2003-04-25	0	1	Herrmann, Mike	Herrmann, Mike	Wildbienen-Kataster Baden-Württemberg		Herrmann, Mike
Osmia uncinata Gerstäcker, 1869	Germany	Baden-Württemberg	Neureut-Hardtwald Teichelholz, Waldlichtung 2	49.0644	8.42031	112	2014-05-16	0	1	Fricke, Julian	Fricke, Julian	Wildbienen-Kataster Baden-Württemberg		Schwenninger, Hans
Osmia uncinata Gerstäcker, 1869	Germany	Baden-Württemberg	Neureut-Zehntwald sandige Brachfläche im Wald (Nr.6)	49.0447	8.41085	113	00.00.1989	0	0	Greiler, H.	Greiler, H.	Wildbienen-Kataster Baden-Württemberg		Greiler, H.
Osmia uncinata Gerstäcker, 1869	Germany	Baden-Württemberg	Oberteuringen/Oberteuringen/Gehöft Wammeratswatt	47.7256	9.49193	460	2000-06-03	1	0	Herrmann, Mike	Herrmann, Mike	Herrmann, Mike (personal communication)		Herrmann, Mike
Osmia uncinata Gerstäcker, 1869	Germany	Baden-Württemberg	Ochsenbach-Geigersberg	49.0252	8.98643	360	1991-05-27	0	1	Schmid-Egger, Christian	Schmid-Egger, Christian	Wildbienen-Kataster Baden-Württemberg		Schmid-Egger, Christian
Osmia uncinata Gerstäcker, 1869	Germany	Baden-Württemberg	Ostelsheim-Gewann Fuchsloch N Ostelsheim	48.7323	8.85956	480	00.00.1994	0	0	Treiber, Reinhold		Wildbienen-Kataster Baden-Württemberg		Treiber, Reinhold
Osmia uncinata Gerstäcker, 1869	Germany	Baden-Württemberg	Ostelsheim-Gewann Hohe Halde	48.7326	8.85004	485	00.00.1994	0	0	Treiber, Reinhold		Wildbienen-Kataster Baden-Württemberg		Treiber, Reinhold
Osmia uncinata Gerstäcker, 1869	Germany	Baden-Württemberg	Reutlingen-Listhof (Steige/ Reinw.)	48.4776	9.1718	390	1993-04-27	0	1	Klemm, Matthias	Klemm, Matthias	Wildbienen-Kataster Baden-Württemberg		Klemm, Matthias
Osmia uncinata Gerstäcker, 1869	Germany	Baden-Württemberg	Rheinau-Schneise Tunnel Hirschacker Süd	49.4204	8.54966	102	2002-05-20	0	1	Klemm, Matthias	Klemm, Matthias	Wildbienen-Kataster Baden-Württemberg		Klemm, Matthias
Osmia uncinata Gerstäcker, 1869	Germany	Baden-Württemberg	Rohr-(Gerstner: Rohr a.F.=Filder)	48.7181	9.10708	441	1964-05-16	1	0	Knorr, H.	Naturkundemuseum Stuttgart (SMNS)	Wildbienen-Kataster Baden-Württemberg		Schwenninger, Hans
Osmia uncinata Gerstäcker, 1869	Germany	Baden-Württemberg	Rohr-(Gerstner: Rohr a.F.=Filder)	48.7181	9.10708	441	1964-06-20	0	1	Knorr, H.	Naturkundemuseum Stuttgart (SMNS)	Wildbienen-Kataster Baden-Württemberg		Schwenninger, Hans
Osmia uncinata Gerstäcker, 1869	Germany	Baden-Württemberg	Satteldorf-Schlagflur S Gewann Rehegert	49.1793	10.1104	439	2006-05-06	1	0	Prosi, Rainer	Prosi, Rainer	Wildbienen-Kataster Baden-Württemberg		Prosi, Rainer
Osmia uncinata Gerstäcker, 1869	Germany	Baden-Württemberg	Schwetzingen-Wald 500m westl A6, nördlich Industriestrasse	49.3475	8.54397	102	2015-04-21	0	2	Burger, Ronald	Burger, Ronald	Wildbienen-Kataster Baden-Württemberg		Burger, Ronald
Osmia uncinata Gerstäcker, 1869	Germany	Baden-Württemberg	Sinzheim/Schiftung/Bannwald, Ausgleich B2	48.7832	8.09547	123	2006-06-09	0	1	Doczkal, Dieter	Doczkal, Dieter	Rennwald, Klaus (personal communication)		Doczkal, Dieter
Osmia uncinata Gerstäcker, 1869	Germany	Baden-Württemberg	Sinzheim/Schiftung/Bannwald, Ausgleich B3	48.7845	8.10038	123	2006-06-09	0	1	Doczkal, Dieter	Doczkal, Dieter	Rennwald, Klaus (personal communication)		Doczkal, Dieter
Osmia uncinata Gerstäcker, 1869	Germany	Baden-Württemberg	Sinzheim/Schiftung/Bannwald, Ausgleich B4	48.7779	8.09411	123	2005-06-15	0	1	Doczkal, Dieter	Doczkal, Dieter	Rennwald, Klaus (personal communication)		Doczkal, Dieter
Osmia uncinata Gerstäcker, 1869	Germany	Baden-Württemberg	Sinzheim/Schiftung/Bannwald, Ausgleich B4 Nordteil	48.7807	8.09678	123	2008-06-02	0	1	Rennwald, Klaus	Rennwald, Klaus	Rennwald, Klaus (personal communication)		Rennwald, Klaus
Osmia uncinata Gerstäcker, 1869	Germany	Baden-Württemberg	Sinzheim/Schiftung/Bannwald, Ausgleich B5 Südteil	48.7689	8.08394	123	2006-05-11	0	1	Rennwald, Klaus	Rennwald, Klaus	Rennwald, Klaus (personal communication)		Rennwald, Klaus
Osmia uncinata Gerstäcker, 1869	Germany	Baden-Württemberg	Sinzheim/Schiftung/Bannwald, Ausgleich W1	48.7714	8.09169	123	2008-05-20	0	1	Doczkal, Dieter	Doczkal, Dieter	Rennwald, Klaus (personal communication)		Doczkal, Dieter
Osmia uncinata Gerstäcker, 1869	Germany	Baden-Württemberg	Sinzheim/Schiftung/Bannwald, Ausgleich W5	48.764	8.08931	123	2005-04-30	0	1	Doczkal, Dieter	Doczkal, Dieter	Rennwald, Klaus (personal communication)		Doczkal, Dieter
Osmia uncinata Gerstäcker, 1869	Germany	Baden-Württemberg	Sinzheim/Schiftung/Bannwald, Ausgleich W6	48.771	8.09058	123	2005-05-24	0	1	Doczkal, Dieter	Doczkal, Dieter	Rennwald, Klaus (personal communication)		Doczkal, Dieter
Osmia uncinata Gerstäcker, 1869	Germany	Baden-Württemberg	Sipplingen	47.7963	9.09939	406	1981-05-20	0	1	Westrich, Paul	Westrich, Paul	Wildbienen-Kataster Baden-Württemberg		Westrich, Paul
Osmia uncinata Gerstäcker, 1869	Germany	Baden-Württemberg	Sipplingen-Lenzfried	47.7848	9.1246	400	1992-05-13	0	1	Schwenninger, Hans	Schwenninger, Hans	Wildbienen-Kataster Baden-Württemberg		Haeseler, Volker
Osmia uncinata Gerstäcker, 1869	Germany	Baden-Württemberg	Sipplingen-NSG Köstenerberg oh. Blütenweg	47.804	9.08545	540	1992-05-13	0	1	Schwenninger, Hans	Schwenninger, Hans	Wildbienen-Kataster Baden-Württemberg		Haeseler, Volker
Osmia uncinata Gerstäcker, 1869	Germany	Baden-Württemberg	Stein-NSG "Beim Steiner Mittelberg"	48.9676	8.66296	250	00.00.1991	0	0	Fellendorf, M.		Wildbienen-Kataster Baden-Württemberg		Fellendorf, M.
Osmia uncinata Gerstäcker, 1869	Germany	Baden-Württemberg	Stollhofen-Sandrasen im Gewann Giereneck E Stollhofen	48.7644	8.06582	123	1994-04-29	0	1	Windschnurer, N.	Schmidt, Konrad	Wildbienen-Kataster Baden-Württemberg		Schmidt, Konrad
Osmia uncinata Gerstäcker, 1869	Germany	Baden-Württemberg	Stuttgart/Büsnau/BB_02_A	48.7578	9.06728	406	2019-05-23	0	1	Rennwald, Klaus	Rennwald, Klaus	Rennwald, Klaus (personal communication)		Rennwald, Klaus
Osmia uncinata Gerstäcker, 1869	Germany	Baden-Württemberg	Tailfingen/NSG Hochberg	48.2693	9.02117	870	1986-07-14	0	1	Dittmar, Theo	Naturkundemuseum Karlsruhe (SMNK)	Wildbienen-Kataster Baden-Württemberg		Westrich, Paul
Osmia uncinata Gerstäcker, 1869	Germany	Baden-Württemberg	Tübingen	48.5225	9.05558	350	1984-06-09	0	1	Westrich, Paul	Westrich, Paul	Wildbienen-Kataster Baden-Württemberg		Westrich, Paul
Osmia uncinata Gerstäcker, 1869	Germany	Baden-Württemberg	Tübingen-Spitzberg - Ödenburg	48.5065	9.02436	375	1978-06-15	0	1	Westrich, Paul	Westrich, Paul	Wildbienen-Kataster Baden-Württemberg		Westrich, Paul
Osmia uncinata Gerstäcker, 1869	Germany	Baden-Württemberg	Untergrombach-Kaisersberg	49.0923	8.56391	240	1976-05-01	1	0	Schmidt, Konrad	Schmidt, Konrad	Wildbienen-Kataster Baden-Württemberg		Schmidt, Konrad
Osmia uncinata Gerstäcker, 1869	Germany	Baden-Württemberg	Walddorfhäslach	48.5889	9.18368	420	1979-05-14	0	2	Westrich, Paul	Westrich, Paul	Wildbienen-Kataster Baden-Württemberg		Westrich, Paul
Osmia uncinata Gerstäcker, 1869	Germany	Baden-Württemberg	Walddorfhäslach	48.5889	9.18368	420	1979-05-28	1	1	Westrich, Paul	Westrich, Paul	Wildbienen-Kataster Baden-Württemberg		Westrich, Paul
Osmia uncinata Gerstäcker, 1869	Germany	Baden-Württemberg	Walddorfhäslach	48.5889	9.18368	420	1979-06-30	0	1	Westrich, Paul	Westrich, Paul	Wildbienen-Kataster Baden-Württemberg		Westrich, Paul
Osmia uncinata Gerstäcker, 1869	Germany	Baden-Württemberg	Waldsee-St. Ottilien Wallfahrtskapelle	47.9953	7.88357	350	1928-05-03	0	1	Strohm, K.	Adelhausermuseum Freiburg im Breisgau	Wildbienen-Kataster Baden-Württemberg		Stoeckhert
Osmia uncinata Gerstäcker, 1869	Germany	Baden-Württemberg	Werbach-Wormental	49.6818	9.65687	234	1989-05-04	0	2	Schmid-Egger, Christian	Schmid-Egger, Christian	Wildbienen-Kataster Baden-Württemberg		Schmid-Egger, Christian
Osmia uncinata Gerstäcker, 1869	Germany	Baden-Württemberg	Zimmern/NSG Zollernhalde	48.3211	8.95384	625	1984-07-09	0	1	Schön	Naturkundemuseum Karlsruhe (SMNK)	Wildbienen-Kataster Baden-Württemberg		Westrich, Paul
Osmia uncinata Gerstäcker, 1869	Germany	Bayern	2 Km S Andechs, Nsg Mesnerbichl	47.951	11.194		2003-06-05	0	1	Schmid-Egger, Christian	Schmid-Egger, Christian	Schmid-Egger, Christian (personal communication)
Osmia uncinata Gerstäcker, 1869	Germany	Bayern	4 Km Ne Lagerlechfeld, Kläranlage	48.19	10.88		2006-05-07	1	0	Schmid-Egger, Christian	Schmid-Egger, Christian	Schmid-Egger, Christian (personal communication)
Osmia uncinata Gerstäcker, 1869	Germany	Bayern	4 Km Ne Lagerlechfeld, Kläranlage	48.19	10.88		2008-06-07	0	1	Schmid-Egger, Christian	Schmid-Egger, Christian	Schmid-Egger, Christian (personal communication)
Osmia uncinata Gerstäcker, 1869	Germany	Bayern	Abensberg	48.8184	11.8483		1941-06-05	0	1	Stöckhert	Zoologische Staatssammlung München (ZSM)	Schmidt, Stefan Zoologische Staatssammlung München (ZSM)		Warnke, Klaus
Osmia uncinata Gerstäcker, 1869	Germany	Bayern	Abensberg	48.8184	11.8483		1946-05-09	0	1	Stöckhert	Oberösterreichisches Landesmuseum Linz - Warnke-Sammlung	Oberösterreichisches Landesmuseum Linz		Haeseler, Volker
Osmia uncinata Gerstäcker, 1869	Germany	Bayern	Altötting/Waldlichtung 3,5 Km Ne Emmerting	48.2269	12.8004	373	2014-05-06	0	1	Scheuchl, Erwin		Voith, Johannes (Bayerisches Landesamt für Umwelt (2019): Artenschutzkartierung Bayern) (personal communication)		Scheuchl Erwin
Osmia uncinata Gerstäcker, 1869	Germany	Bayern	Amberg-Sulzbach/Felsgebiet Am "Lohberg" N Heimhof	49.3484	11.7673	455	2006-06-08	0	1	Wickl, Dr. Karl - Heinz		Voith, Johannes (Bayerisches Landesamt für Umwelt (2019): Artenschutzkartierung Bayern) (personal communication)		Wickl Dr. Karl - Heinz
Osmia uncinata Gerstäcker, 1869	Germany	Bayern	Amberg-Sulzbach/Felshang Am "Schwanenwirtsberg", 500M So Allersburg Im Lauterachtal	49.3058	11.7868	399	2006-05-12	0	1	Wickl, Dr. Karl - Heinz		Voith, Johannes (Bayerisches Landesamt für Umwelt (2019): Artenschutzkartierung Bayern) (personal communication)		Wickl Dr. Karl - Heinz
Osmia uncinata Gerstäcker, 1869	Germany	Bayern	Amberg-Sulzbach/Felshang Im Palkeringer Tal, 1Km Nw Rieden	49.3276	11.9312	392	2006-06-10	0	1	Wickl, Dr. Karl - Heinz		Voith, Johannes (Bayerisches Landesamt für Umwelt (2019): Artenschutzkartierung Bayern) (personal communication)		Wickl Dr. Karl - Heinz
Osmia uncinata Gerstäcker, 1869	Germany	Bayern	Amberg-Sulzbach/Felshang Im Pirzer - Tal Am S Zwi - Berg, 1,3Km No Adertshausen	49.2915	11.8529	398	2006-06-10	0	1	Wickl, Dr. Karl - Heinz		Voith, Johannes (Bayerisches Landesamt für Umwelt (2019): Artenschutzkartierung Bayern) (personal communication)		Wickl Dr. Karl - Heinz
Osmia uncinata Gerstäcker, 1869	Germany	Bayern	Amberg-Sulzbach/Jurahang Mit Kleinen Felsen Im Mühlhausener Tal, Ca. 1Km So Mühlhausen	49.3416	11.7248	442	2006-06-27	1	0	Wickl, Dr. Karl - Heinz		Voith, Johannes (Bayerisches Landesamt für Umwelt (2019): Artenschutzkartierung Bayern) (personal communication)		Wickl Dr. Karl - Heinz
Osmia uncinata Gerstäcker, 1869	Germany	Bayern	Amberg-Sulzbach/Sandgrube 1,5 Km Oestlich Grosschoenbrunn (In Betrieb)	49.5765	11.9093	482	1988-06-22	0	1	Wickl, Elisabeth und Karl-Heinz		Voith, Johannes (Bayerisches Landesamt für Umwelt (2019): Artenschutzkartierung Bayern) (personal communication)		Wickl Dr. Karl - Heinz
Osmia uncinata Gerstäcker, 1869	Germany	Bayern	Amberg-Sulzbach/Sandgrube Am Südrand Des Sandelholzes, 2 Km W Atzmannsricht	49.5546	11.845	531	1987-06-30	0	1	Wickl, Elisabeth und Karl-Heinz		Voith, Johannes (Bayerisches Landesamt für Umwelt (2019): Artenschutzkartierung Bayern) (personal communication)		Warncke, Klaus
Osmia uncinata Gerstäcker, 1869	Germany	Bayern	Aschaffenburg	49.9762	9.14471		1948-04-22	0	1	Heinrich, J.	Oberösterreichisches Landesmuseum Linz	Oberösterreichisches Landesmuseum Linz		Haeseler, Volker
Osmia uncinata Gerstäcker, 1869	Germany	Bayern	Aschaffenburg	49.9762	9.14471		1948-05-09	0	1	Heinrich, J.	Oberösterreichisches Landesmuseum Linz	Oberösterreichisches Landesmuseum Linz		Tkalců, Borek
Osmia uncinata Gerstäcker, 1869	Germany	Bayern	Aschaffenburg	49.9762	9.14471		1948-05-23	0	1	Heinrich, J.	Oberösterreichisches Landesmuseum Linz	Oberösterreichisches Landesmuseum Linz		Haeseler, Volker
Osmia uncinata Gerstäcker, 1869	Germany	Bayern	Aschaffenburg, Stadt/Aschaffenburg	49.9782	9.14737	134	1941-05-13	1	0	Warncke, Klaus		Voith, Johannes (Bayerisches Landesamt für Umwelt (2019): Artenschutzkartierung Bayern) (personal communication)		Warncke, Klaus
Osmia uncinata Gerstäcker, 1869	Germany	Bayern	Aschaffenburg, Stadt/Aschaffenburg	49.9782	9.14737	134	1948-04-22	3	2	Warncke, Klaus		Voith, Johannes (Bayerisches Landesamt für Umwelt (2019): Artenschutzkartierung Bayern) (personal communication)		Warncke, Klaus
Osmia uncinata Gerstäcker, 1869	Germany	Bayern	Aschaffenburg, Stadt/Gailbach	49.9472	9.20487	227	1953-04-20	1	1	Warncke, Klaus		Voith, Johannes (Bayerisches Landesamt für Umwelt (2019): Artenschutzkartierung Bayern) (personal communication)		Warncke, Klaus
Osmia uncinata Gerstäcker, 1869	Germany	Bayern	Aschaffenburg, Stadt/St.Ortueb.Pl. Aschaffenburg/Schweinheim	49.9423	9.17972	182	00.00.1991	0	0	Scharrer, Steffen		Voith, Johannes (Bayerisches Landesamt für Umwelt (2019): Artenschutzkartierung Bayern) (personal communication)		Doczkal, Dieter
Osmia uncinata Gerstäcker, 1869	Germany	Bayern	Aschaffenburg/Abgeschobene Sandfläche E Der Autobahn, Teilfläche Des Nsg "Alzenauer Sande" (Alte Weide)	50.0743	9.03884	115	1994-06-19	0	1	Scharrer, Steffen		Voith, Johannes (Bayerisches Landesamt für Umwelt (2019): Artenschutzkartierung Bayern) (personal communication)		Scharrer Steffen
Osmia uncinata Gerstäcker, 1869	Germany	Bayern	Aschaffenburg/Kahl	50.058	9.00688	112	1938-06-26	0	1	Warncke, Klaus		Voith, Johannes (Bayerisches Landesamt für Umwelt (2019): Artenschutzkartierung Bayern) (personal communication)		Warncke, Klaus
Osmia uncinata Gerstäcker, 1869	Germany	Bayern	Augsburg, Stadt/Augsburg-Haunstetter Wald	48.2896	10.9326	506	1958-07-13	0	1	Warncke, Klaus	Zoologische Staatssammlung München (ZSM)	Voith, Johannes (Bayerisches Landesamt für Umwelt (2019): Artenschutzkartierung Bayern) (personal communication)		Warncke, Klaus
Osmia uncinata Gerstäcker, 1869	Germany	Bayern	Augsburg, Stadt/Schneeheide-Kiefernwald,Kuhheide	48.2993	10.9407	501	00.00.1991	0	0	ÖKOKART Gesellschaft für ökolog. Auftragsforschung		Voith, Johannes (Bayerisches Landesamt für Umwelt (2019): Artenschutzkartierung Bayern) (personal communication)		Böhme C.
Osmia uncinata Gerstäcker, 1869	Germany	Bayern	Augsburg, Stadt/Wertachheide Ost , Heidereste In Den Wertachauen, Teilfläche B Ca. 760 M N Staustufe Bobingen (Wehr)	48.3008	10.8407	499	00.00.1991	0	0	ÖKOKART Gesellschaft für ökolog. Auftragsforschung		Voith, Johannes (Bayerisches Landesamt für Umwelt (2019): Artenschutzkartierung Bayern) (personal communication)		Böhme C.
Osmia uncinata Gerstäcker, 1869	Germany	Bayern	Augsburg-Haunstetten	48.3011	10.9383		2006-06-25	0	1	Schmid-Egger, Christian	Zoologische Staatssammlung München (ZSM)	Schmidt, Stefan Zoologische Staatssammlung München (ZSM)
Osmia uncinata Gerstäcker, 1869	Germany	Bayern	Bad Kissingen/Trockenhang (Sse) An Der Sommerleite E Machtilshau Sen	50.122	9.98779	264	1992-05-27	0	1	Mandery, Klaus		Voith, Johannes (Bayerisches Landesamt für Umwelt (2019): Artenschutzkartierung Bayern) (personal communication)		Mandery, Klaus
Osmia uncinata Gerstäcker, 1869	Germany	Bayern	Bad Kissingen/Trockenhang 1000M Ene Elfershausen-Machtilshausen	50.129	9.98454	330	1992-05-27	0	1	Mandery, Klaus		Voith, Johannes (Bayerisches Landesamt für Umwelt (2019): Artenschutzkartierung Bayern) (personal communication)		Mandery, Klaus
Osmia uncinata Gerstäcker, 1869	Germany	Bayern	Bamberg/Hauptsmoorwald N	49.9143	10.9496	285	1932-06-16	0	1	Warncke, Klaus		Voith, Johannes (Bayerisches Landesamt für Umwelt (2019): Artenschutzkartierung Bayern) (personal communication)		Warncke, Klaus
Osmia uncinata Gerstäcker, 1869	Germany	Bayern	Bamberg/Hauptsmoorwald N	49.9143	10.9496	285	1932-06-18	0	1	Warncke, Klaus		Voith, Johannes (Bayerisches Landesamt für Umwelt (2019): Artenschutzkartierung Bayern) (personal communication)		Warncke, Klaus
Osmia uncinata Gerstäcker, 1869	Germany	Bayern	Bamberg/Magerrasen Im Lb Trockental Der Leinleiter (Tummlertal)	49.8972	11.137	419	2013-07-14	0	1	Weber, Klaus		Voith, Johannes (Bayerisches Landesamt für Umwelt (2019): Artenschutzkartierung Bayern) (personal communication)		Weber, Klaus
Osmia uncinata Gerstäcker, 1869	Germany	Bayern	Bamberg/Oberhaid	49.9423	10.8203	276	1932-06-28	0	1	Warncke, Klaus		Voith, Johannes (Bayerisches Landesamt für Umwelt (2019): Artenschutzkartierung Bayern) (personal communication)		Warncke, Klaus
Osmia uncinata Gerstäcker, 1869	Germany	Bayern	Bamberg/Oberhaid	49.9423	10.8203	276	00.04.1930	0	1	Warncke, Klaus		Voith, Johannes (Bayerisches Landesamt für Umwelt (2019): Artenschutzkartierung Bayern) (personal communication)		Warncke, Klaus
Osmia uncinata Gerstäcker, 1869	Germany	Bayern	Bayreuth/Ostexponierte Strassenboeschung Suedoestl. Von Neuenreuth	49.8827	11.6094	431	1986-05-22	1	0	Warncke, Klaus		Voith, Johannes (Bayerisches Landesamt für Umwelt (2019): Artenschutzkartierung Bayern) (personal communication)		Warncke, Klaus
Osmia uncinata Gerstäcker, 1869	Germany	Bayern	Bayreuth/S- Und E-Expon. Halbtrockenrasen Am Schrottenberg, N Pottenstein	49.7767	11.4134	416	1948-05-16	0	1	Warncke, Klaus		Voith, Johannes (Bayerisches Landesamt für Umwelt (2019): Artenschutzkartierung Bayern) (personal communication)		Warncke, Klaus
Osmia uncinata Gerstäcker, 1869	Germany	Bayern	Bayreuth/S- Und E-Expon. Halbtrockenrasen Am Schrottenberg, N Pottenstein	49.7767	11.4134	416	1949-04-15	1	0	Warncke, Klaus		Voith, Johannes (Bayerisches Landesamt für Umwelt (2019): Artenschutzkartierung Bayern) (personal communication)		Warncke, Klaus
Osmia uncinata Gerstäcker, 1869	Germany	Bayern	Bayreuth/S- Und E-Expon. Halbtrockenrasen Am Schrottenberg, N Pottenstein	49.7767	11.4134	416	1950-05-07	1	1	Warncke, Klaus		Voith, Johannes (Bayerisches Landesamt für Umwelt (2019): Artenschutzkartierung Bayern) (personal communication)		Warncke, Klaus
Osmia uncinata Gerstäcker, 1869	Germany	Bayern	Bayreuth/S- Und E-Expon. Halbtrockenrasen Am Schrottenberg, N Pottenstein	49.7767	11.4134	416	1951-05-13	0	1	Warncke, Klaus		Voith, Johannes (Bayerisches Landesamt für Umwelt (2019): Artenschutzkartierung Bayern) (personal communication)		Warncke, Klaus
Osmia uncinata Gerstäcker, 1869	Germany	Bayern	Bayreuth/Suedexponierter Waldrand Suedlich Weiglathal An Verbindungsstrasse Weiglathal-Trockau	49.8447	11.5107	555	1986-06-26	0	1	Warncke, Klaus		Voith, Johannes (Bayerisches Landesamt für Umwelt (2019): Artenschutzkartierung Bayern) (personal communication)		Warncke, Klaus
Osmia uncinata Gerstäcker, 1869	Germany	Bayern	Berchtesgadener Land/Königsbachalm, Sw-Hang; 1210M; Almfläche An Steilem Hang Mit Einzelnen Freien Felsen, Ca. 400M N Königsbach-Alm	47.5686	13.0149	1205	1985-07-06	0	1	Warncke, Klaus		Voith, Johannes (Bayerisches Landesamt für Umwelt (2019): Artenschutzkartierung Bayern) (personal communication)		Voith, Johannes ; Warncke, Klaus
Osmia uncinata Gerstäcker, 1869	Germany	Bayern	Cham/Sandgrube 700M Östlich Schachendorf, Nw Zandt (Ehemalige Sandgrube)	49.1695	12.7084	401	1988-05-26	0	1	Warncke, Klaus		Voith, Johannes (Bayerisches Landesamt für Umwelt (2019): Artenschutzkartierung Bayern) (personal communication)		Warncke, Klaus
Osmia uncinata Gerstäcker, 1869	Germany	Bayern	Dachau	49.5833	11.0167		1968-05-10	1	0	Warncke, Klaus	Oberösterreichisches Landesmuseum Linz - Warnke-Sammlung	Oberösterreichisches Landesmuseum Linz		Haeseler, Volker
Osmia uncinata Gerstäcker, 1869	Germany	Bayern	Dachau	49.5833	11.0167		1981-04-30	0	1	Warncke, Klaus	Oberösterreichisches Landesmuseum Linz - Warnke-Sammlung	Oberösterreichisches Landesmuseum Linz		Haeseler, Volker
Osmia uncinata Gerstäcker, 1869	Germany	Bayern	Dachau	49.5833	11.0167		1981-05-19	0	1	Warncke, Klaus	Oberösterreichisches Landesmuseum Linz - Warnke-Sammlung	Oberösterreichisches Landesmuseum Linz		Haeseler, Volker
Osmia uncinata Gerstäcker, 1869	Germany	Bayern	Dachau	49.5833	11.0167		1982-05-27	0	1	Warncke, Klaus	Oberösterreichisches Landesmuseum Linz - Warnke-Sammlung	Oberösterreichisches Landesmuseum Linz		Haeseler, Volker
Osmia uncinata Gerstäcker, 1869	Germany	Bayern	Ebersberg, St. Hubertus, Lichtung	48.1079	11.9324		1992-05-21	0	1	Scheuchl, Erwin	Scheuchl, Erwin	Scheuchl, Erwin (personal communication)
Osmia uncinata Gerstäcker, 1869	Germany	Bayern	Erlangen	49.5833	11.0167		1918-03-24	1	0	Stöckhert	Oberösterreichisches Landesmuseum Linz - Warnke-Sammlung	Oberösterreichisches Landesmuseum Linz		Haeseler, Volker
Osmia uncinata Gerstäcker, 1869	Germany	Bayern	Erlangen	49.5833	11.0167		1918-05-04	0	0	Stöckhert, E.	SEMC	Global Biodiversity Information Facility		Stoeckhert, E
Osmia uncinata Gerstäcker, 1869	Germany	Bayern	Erlangen	49.5833	11.0167		1931-05-03	1	0	Stöckhert	Oberösterreichisches Landesmuseum Linz - Warnke-Sammlung	Oberösterreichisches Landesmuseum Linz		Warncke, Klaus
Osmia uncinata Gerstäcker, 1869	Germany	Bayern	Erlangen	49.5833	11.0167		1932-04-28	1	0	Stöckhert	Oberösterreichisches Landesmuseum Linz - Warnke-Sammlung	Oberösterreichisches Landesmuseum Linz		Haeseler, Volker
Osmia uncinata Gerstäcker, 1869	Germany	Bayern	Erlangen	49.5833	11.0167		1934-05-15	1	0	Stöckhert	Oberösterreichisches Landesmuseum Linz - Warnke-Sammlung	Oberösterreichisches Landesmuseum Linz		Haeseler, Volker
Osmia uncinata Gerstäcker, 1869	Germany	Bayern	Erlangen	49.5833	11.0167		1937-05-17	0	1	Stöckhert	Oberösterreichisches Landesmuseum Linz - Warnke-Sammlung	Oberösterreichisches Landesmuseum Linz		Warncke, Klaus
Osmia uncinata Gerstäcker, 1869	Germany	Bayern	Erlangen	49.5833	11.0167		1938-05-06	1	0	Stöckhert	Oberösterreichisches Landesmuseum Linz - Warnke-Sammlung	Oberösterreichisches Landesmuseum Linz		Haeseler, Volker
Osmia uncinata Gerstäcker, 1869	Germany	Bayern	Erlangen	49.5833	11.0167		1940-04-22	1	0	Stöckhert	Oberösterreichisches Landesmuseum Linz - Warnke-Sammlung	Oberösterreichisches Landesmuseum Linz		Haeseler, Volker
Osmia uncinata Gerstäcker, 1869	Germany	Bayern	Erlangen	49.5833	11.0167		1946-04-20	0	1	Stöckhert	Oberösterreichisches Landesmuseum Linz - Warnke-Sammlung	Oberösterreichisches Landesmuseum Linz		Haeseler, Volker
Osmia uncinata Gerstäcker, 1869	Germany	Bayern	Erlangen, Nsg Tennenlohe	49.5573	11.0536		1995-04-21	1	0	Blösch, Manfred	Zoologische Staatssammlung München (ZSM)	Schmidt, Stefan Zoologische Staatssammlung München (ZSM)		Blösch, Manfred
Osmia uncinata Gerstäcker, 1869	Germany	Bayern	Erlangen, Nsg Tennenlohe	49.5573	11.0536		1995-04-24	1	0	Blösch, Manfred	Zoologische Staatssammlung München (ZSM)	Schmidt, Stefan Zoologische Staatssammlung München (ZSM)		Blösch, Manfred
Osmia uncinata Gerstäcker, 1869	Germany	Bayern	Erlangen, Nsg Tennenlohe	49.5573	11.0536		1995-05-23	0	1	Blösch, Manfred	Zoologische Staatssammlung München (ZSM)	Schmidt, Stefan Zoologische Staatssammlung München (ZSM)		Blösch, Manfred
Osmia uncinata Gerstäcker, 1869	Germany	Bayern	Erlangen, Nsg Tennenlohe	49.5573	11.0536		1995-06-27	0	1	Blösch, Manfred	Zoologische Staatssammlung München (ZSM)	Schmidt, Stefan Zoologische Staatssammlung München (ZSM)		Blösch, Manfred
Osmia uncinata Gerstäcker, 1869	Germany	Bayern	Erlangen, Nsg Tennenlohe	49.5573	11.0536		1995-06-29	0	1	Blösch, Manfred	Zoologische Staatssammlung München (ZSM)	Schmidt, Stefan Zoologische Staatssammlung München (ZSM)		Blösch, Manfred
Osmia uncinata Gerstäcker, 1869	Germany	Bayern	Erlangen, St. Johann-Eggen	49.6106	10.9799		2009-05-23	0	1		Zoologische Staatssammlung München (ZSM)	Schmidt, Stefan Zoologische Staatssammlung München (ZSM)		Blösch, Manfred
Osmia uncinata Gerstäcker, 1869	Germany	Bayern	Erlangen, Stadt/Aufgelassene "Heusteg - Sandgruben" In Der Dechsendorfer Lohe, 2 Sandgruben	49.6218	10.9662	274	1984-06-07	0	1	Warncke, Klaus		Voith, Johannes (Bayerisches Landesamt für Umwelt (2019): Artenschutzkartierung Bayern) (personal communication)		Warncke, Klaus
Osmia uncinata Gerstäcker, 1869	Germany	Bayern	Erlangen, Stadt/Brachflaeche Suedlich Der Ebrard-Str. ("Riviera") Schwabachtal (Erlangen-Nord)	49.6021	11.0236	277	1919-05-15	0	1	Warncke, Klaus; Milbradt Klaus; N.N.		Voith, Johannes (Bayerisches Landesamt für Umwelt (2019): Artenschutzkartierung Bayern) (personal communication)		Warncke, Klaus
Osmia uncinata Gerstäcker, 1869	Germany	Bayern	Erlangen, Stadt/Brachflaeche Suedlich Der Ebrard-Str. ("Riviera") Schwabachtal (Erlangen-Nord)	49.6021	11.0236	277	1928-04-27	20	0	Warncke, Klaus; Milbradt Klaus; N.N.		Voith, Johannes (Bayerisches Landesamt für Umwelt (2019): Artenschutzkartierung Bayern) (personal communication)		Warncke, Klaus
Osmia uncinata Gerstäcker, 1869	Germany	Bayern	Erlangen, Stadt/Brachflaeche Suedlich Der Ebrard-Str. ("Riviera") Schwabachtal (Erlangen-Nord)	49.6021	11.0236	277	1928-04-28	10	0	Warncke, Klaus; Milbradt Klaus; N.N.		Voith, Johannes (Bayerisches Landesamt für Umwelt (2019): Artenschutzkartierung Bayern) (personal communication)		Warncke, Klaus
Osmia uncinata Gerstäcker, 1869	Germany	Bayern	Erlangen, Stadt/Erlangen, Sandgrube Am Heusteg	49.6194	10.9739	274	00.00.1984	0	0	Schmidt, Jessica		Voith, Johannes (Bayerisches Landesamt für Umwelt (2019): Artenschutzkartierung Bayern) (personal communication)		Weber, Klaus
Osmia uncinata Gerstäcker, 1869	Germany	Bayern	Erlangen, Stadt/Erlangen-Burgberg	49.6119	11.0043	300	1915-04-28	1	0	Warncke, Klaus		Voith, Johannes (Bayerisches Landesamt für Umwelt (2019): Artenschutzkartierung Bayern) (personal communication)		Stoeckhert N.N.
Osmia uncinata Gerstäcker, 1869	Germany	Bayern	Erlangen, Stadt/Erlangen-Burgberg	49.6119	11.0043	300	1916-04-01	10	0	Warncke, Klaus		Voith, Johannes (Bayerisches Landesamt für Umwelt (2019): Artenschutzkartierung Bayern) (personal communication)		Stoeckhert N.N.
Osmia uncinata Gerstäcker, 1869	Germany	Bayern	Erlangen, Stadt/Erlangen-Burgberg	49.6119	11.0043	300	1916-04-03	20	0	Warncke, Klaus		Voith, Johannes (Bayerisches Landesamt für Umwelt (2019): Artenschutzkartierung Bayern) (personal communication)		Stoeckhert N.N.
Osmia uncinata Gerstäcker, 1869	Germany	Bayern	Erlangen, Stadt/Erlangen-Burgberg	49.6119	11.0043	300	1916-04-08	10	0	Warncke, Klaus		Voith, Johannes (Bayerisches Landesamt für Umwelt (2019): Artenschutzkartierung Bayern) (personal communication)		Stoeckhert N.N.
Osmia uncinata Gerstäcker, 1869	Germany	Bayern	Erlangen, Stadt/Erlangen-Stadtwald	49.6135	11.0278	335	1915-04-06	100	0	Warncke, Klaus		Voith, Johannes (Bayerisches Landesamt für Umwelt (2019): Artenschutzkartierung Bayern) (personal communication)		Warncke, Klaus
Osmia uncinata Gerstäcker, 1869	Germany	Bayern	Erlangen, Stadt/Erlangen-Stadtwald	49.6135	11.0278	335	1915-05-11	5	5	Warncke, Klaus		Voith, Johannes (Bayerisches Landesamt für Umwelt (2019): Artenschutzkartierung Bayern) (personal communication)		Warncke, Klaus
Osmia uncinata Gerstäcker, 1869	Germany	Bayern	Erlangen, Stadt/Erlangen-Stadtwald	49.6135	11.0278	335	1915-05-22	1	0	Warncke, Klaus		Voith, Johannes (Bayerisches Landesamt für Umwelt (2019): Artenschutzkartierung Bayern) (personal communication)		Warncke, Klaus
Osmia uncinata Gerstäcker, 1869	Germany	Bayern	Erlangen, Stadt/Erlangen-Stadtwald	49.6135	11.0278	335	1915-05-28	5	0	Warncke, Klaus		Voith, Johannes (Bayerisches Landesamt für Umwelt (2019): Artenschutzkartierung Bayern) (personal communication)		Warncke, Klaus
Osmia uncinata Gerstäcker, 1869	Germany	Bayern	Erlangen, Stadt/Erlangen-Stadtwald	49.6135	11.0278	335	1916-04-04	50	0	Warncke, Klaus		Voith, Johannes (Bayerisches Landesamt für Umwelt (2019): Artenschutzkartierung Bayern) (personal communication)		Warncke, Klaus
Osmia uncinata Gerstäcker, 1869	Germany	Bayern	Erlangen, Stadt/Erlangen-Stadtwald	49.6135	11.0278	335	1916-04-27	0	5	Warncke, Klaus		Voith, Johannes (Bayerisches Landesamt für Umwelt (2019): Artenschutzkartierung Bayern) (personal communication)		Warncke, Klaus
Osmia uncinata Gerstäcker, 1869	Germany	Bayern	Erlangen, Stadt/Erlangen-Stadtwald	49.6135	11.0278	335	1916-07-30	0	1	Warncke, Klaus		Voith, Johannes (Bayerisches Landesamt für Umwelt (2019): Artenschutzkartierung Bayern) (personal communication)		Warncke, Klaus
Osmia uncinata Gerstäcker, 1869	Germany	Bayern	Erlangen, Stadt/Erlangen-Stadtwald	49.6135	11.0278	335	1917-05-02	1	0	Warncke, Klaus		Voith, Johannes (Bayerisches Landesamt für Umwelt (2019): Artenschutzkartierung Bayern) (personal communication)		Warncke, Klaus
Osmia uncinata Gerstäcker, 1869	Germany	Bayern	Erlangen, Stadt/Erlangen-Stadtwald	49.6135	11.0278	335	1917-05-07	5	10	Warncke, Klaus		Voith, Johannes (Bayerisches Landesamt für Umwelt (2019): Artenschutzkartierung Bayern) (personal communication)		Warncke, Klaus
Osmia uncinata Gerstäcker, 1869	Germany	Bayern	Erlangen, Stadt/Erlangen-Stadtwald	49.6135	11.0278	335	1917-05-13	5	15	Warncke, Klaus		Voith, Johannes (Bayerisches Landesamt für Umwelt (2019): Artenschutzkartierung Bayern) (personal communication)		Warncke, Klaus
Osmia uncinata Gerstäcker, 1869	Germany	Bayern	Erlangen, Stadt/Erlangen-Stadtwald	49.6135	11.0278	335	1918-04-14	5	0	Warncke, Klaus		Voith, Johannes (Bayerisches Landesamt für Umwelt (2019): Artenschutzkartierung Bayern) (personal communication)		Warncke, Klaus
Osmia uncinata Gerstäcker, 1869	Germany	Bayern	Erlangen, Stadt/Erlangen-Stadtwald	49.6135	11.0278	335	1918-05-03	0	5	Warncke, Klaus		Voith, Johannes (Bayerisches Landesamt für Umwelt (2019): Artenschutzkartierung Bayern) (personal communication)		Warncke, Klaus
Osmia uncinata Gerstäcker, 1869	Germany	Bayern	Erlangen, Stadt/Erlangen-Stadtwald	49.6135	11.0278	335	1918-05-04	0	10	Warncke, Klaus		Voith, Johannes (Bayerisches Landesamt für Umwelt (2019): Artenschutzkartierung Bayern) (personal communication)		Warncke, Klaus
Osmia uncinata Gerstäcker, 1869	Germany	Bayern	Erlangen, Stadt/Erlangen-Stadtwald	49.6135	11.0278	335	1918-05-05	0	50	Warncke, Klaus		Voith, Johannes (Bayerisches Landesamt für Umwelt (2019): Artenschutzkartierung Bayern) (personal communication)		Warncke, Klaus
Osmia uncinata Gerstäcker, 1869	Germany	Bayern	Erlangen, Stadt/Erlangen-Stadtwald	49.6135	11.0278	335	1918-05-06	0	50	Warncke, Klaus		Voith, Johannes (Bayerisches Landesamt für Umwelt (2019): Artenschutzkartierung Bayern) (personal communication)		Warncke, Klaus
Osmia uncinata Gerstäcker, 1869	Germany	Bayern	Erlangen, Stadt/Erlangen-Stadtwald	49.6135	11.0278	335	1919-05-11	0	5	Warncke, Klaus		Voith, Johannes (Bayerisches Landesamt für Umwelt (2019): Artenschutzkartierung Bayern) (personal communication)		Warncke, Klaus
Osmia uncinata Gerstäcker, 1869	Germany	Bayern	Erlangen, Stadt/Erlangen-Stadtwald	49.6135	11.0278	335	1919-05-14	0	1	Warncke, Klaus		Voith, Johannes (Bayerisches Landesamt für Umwelt (2019): Artenschutzkartierung Bayern) (personal communication)		Warncke, Klaus
Osmia uncinata Gerstäcker, 1869	Germany	Bayern	Erlangen, Stadt/Erlangen-Stadtwald	49.6135	11.0278	335	1919-05-24	0	1	Warncke, Klaus		Voith, Johannes (Bayerisches Landesamt für Umwelt (2019): Artenschutzkartierung Bayern) (personal communication)		Warncke, Klaus
Osmia uncinata Gerstäcker, 1869	Germany	Bayern	Erlangen, Stadt/Erlangen-Stadtwald	49.6135	11.0278	335	1923-04-11	5	0	Warncke, Klaus		Voith, Johannes (Bayerisches Landesamt für Umwelt (2019): Artenschutzkartierung Bayern) (personal communication)		Warncke, Klaus
Osmia uncinata Gerstäcker, 1869	Germany	Bayern	Erlangen, Stadt/Freileitungstrasse In Der Dechsendorfer Lohe Zwischen Heusteg Und Oberndorfer Weiher	49.6227	10.9634	277	1986-05-27	0	1	Altvater, Hartmut		Voith, Johannes (Bayerisches Landesamt für Umwelt (2019): Artenschutzkartierung Bayern) (personal communication)		Warncke, Klaus
Osmia uncinata Gerstäcker, 1869	Germany	Bayern	Erlangen, Stadt/Meilwald	49.6109	11.0382	311	1913-05-16	0	1	Warncke, Klaus		Voith, Johannes (Bayerisches Landesamt für Umwelt (2019): Artenschutzkartierung Bayern) (personal communication)		Warncke, Klaus
Osmia uncinata Gerstäcker, 1869	Germany	Bayern	Erlangen, Stadt/Meilwald	49.6109	11.0382	311	1914-04-14	1	0	Warncke, Klaus		Voith, Johannes (Bayerisches Landesamt für Umwelt (2019): Artenschutzkartierung Bayern) (personal communication)		Warncke, Klaus
Osmia uncinata Gerstäcker, 1869	Germany	Bayern	Erlangen, Stadt/Meilwald	49.6109	11.0382	311	1916-03-31	2	0	Warncke, Klaus		Voith, Johannes (Bayerisches Landesamt für Umwelt (2019): Artenschutzkartierung Bayern) (personal communication)		Warncke, Klaus
Osmia uncinata Gerstäcker, 1869	Germany	Bayern	Erlangen, Stadt/Meilwald	49.6109	11.0382	311	1918-03-24	1	0	Warncke, Klaus		Voith, Johannes (Bayerisches Landesamt für Umwelt (2019): Artenschutzkartierung Bayern) (personal communication)		Warncke, Klaus
Osmia uncinata Gerstäcker, 1869	Germany	Bayern	Erlangen, Stadt/Meilwald	49.6109	11.0382	311	1918-04-26	10	10	Warncke, Klaus		Voith, Johannes (Bayerisches Landesamt für Umwelt (2019): Artenschutzkartierung Bayern) (personal communication)		Warncke, Klaus
Osmia uncinata Gerstäcker, 1869	Germany	Bayern	Erlangen, Stadt/Meilwald	49.6109	11.0382	311	1927-05-16	0	1	Stöckhert	Zoologische Staatssammlung München (ZSM)	Voith, Johannes (Bayerisches Landesamt für Umwelt (2019): Artenschutzkartierung Bayern) (personal communication)		Haeseler, Volker
Osmia uncinata Gerstäcker, 1869	Germany	Bayern	Erlangen, Stadt/Meilwald	49.6109	11.0382	311	1928-04-25	10	1	Stöckhert	Zoologische Staatssammlung München (ZSM)	Voith, Johannes (Bayerisches Landesamt für Umwelt (2019): Artenschutzkartierung Bayern) (personal communication)		Haeseler, Volker
Osmia uncinata Gerstäcker, 1869	Germany	Bayern	Erlangen, Stadt/Meilwald	49.6109	11.0382	311	1928-05-03	10	10	Stöckhert	Zoologische Staatssammlung München (ZSM)	Voith, Johannes (Bayerisches Landesamt für Umwelt (2019): Artenschutzkartierung Bayern) (personal communication)		Haeseler, Volker
Osmia uncinata Gerstäcker, 1869	Germany	Bayern	Erlangen, Stadt/Meilwald	49.6109	11.0382	311	1930-04-26	1	0	Stöckhert	Zoologische Staatssammlung München (ZSM)	Voith, Johannes (Bayerisches Landesamt für Umwelt (2019): Artenschutzkartierung Bayern) (personal communication)		Peters, D. S.
Osmia uncinata Gerstäcker, 1869	Germany	Bayern	Erlangen, Stadt/Meilwald	49.6109	11.0382	311	1931-05-03	2	0	Stöckhert	Zoologische Staatssammlung München (ZSM)	Voith, Johannes (Bayerisches Landesamt für Umwelt (2019): Artenschutzkartierung Bayern) (personal communication)		Haeseler, Volker
Osmia uncinata Gerstäcker, 1869	Germany	Bayern	Erlangen, Stadt/Meilwald	49.6109	11.0382	311	1931-05-04	1	0	Stöckhert	Zoologische Staatssammlung München (ZSM)	Voith, Johannes (Bayerisches Landesamt für Umwelt (2019): Artenschutzkartierung Bayern) (personal communication)		Haeseler, Volker
Osmia uncinata Gerstäcker, 1869	Germany	Bayern	Erlangen, Stadt/Meilwald	49.6109	11.0382	311	1932-04-28	1	0	Warncke, Klaus		Voith, Johannes (Bayerisches Landesamt für Umwelt (2019): Artenschutzkartierung Bayern) (personal communication)		Warncke, Klaus
Osmia uncinata Gerstäcker, 1869	Germany	Bayern	Erlangen, Stadt/Meilwald	49.6109	11.0382	311	1937-05-14	0	1	Stöckhert	Zoologische Staatssammlung München (ZSM)	Voith, Johannes (Bayerisches Landesamt für Umwelt (2019): Artenschutzkartierung Bayern) (personal communication)		Warncke, Klaus
Osmia uncinata Gerstäcker, 1869	Germany	Bayern	Erlangen, Stadt/Meilwald	49.6109	11.0382	311	1937-05-15	1	0	Warncke, Klaus		Voith, Johannes (Bayerisches Landesamt für Umwelt (2019): Artenschutzkartierung Bayern) (personal communication)		Warncke, Klaus
Osmia uncinata Gerstäcker, 1869	Germany	Bayern	Erlangen, Stadt/Meilwald	49.6109	11.0382	311	1937-05-17	0	2	Stöckhert	Zoologische Staatssammlung München (ZSM)	Voith, Johannes (Bayerisches Landesamt für Umwelt (2019): Artenschutzkartierung Bayern) (personal communication)		Warncke, Klaus
Osmia uncinata Gerstäcker, 1869	Germany	Bayern	Erlangen, Stadt/Meilwald	49.6109	11.0382	311	1938-05-06	1	0	Warncke, Klaus		Voith, Johannes (Bayerisches Landesamt für Umwelt (2019): Artenschutzkartierung Bayern) (personal communication)		Warncke, Klaus
Osmia uncinata Gerstäcker, 1869	Germany	Bayern	Erlangen, Stadt/Meilwald	49.6109	11.0382	311	1938-05-27	0	1	Stöckhert	Zoologische Staatssammlung München (ZSM)	Voith, Johannes (Bayerisches Landesamt für Umwelt (2019): Artenschutzkartierung Bayern) (personal communication)		Warncke, Klaus
Osmia uncinata Gerstäcker, 1869	Germany	Bayern	Erlangen, Stadt/Meilwald	49.6109	11.0382	311	1940-04-22	3	0	Stöckhert	Zoologische Staatssammlung München (ZSM)	Voith, Johannes (Bayerisches Landesamt für Umwelt (2019): Artenschutzkartierung Bayern) (personal communication)		Haeseler, Volker
Osmia uncinata Gerstäcker, 1869	Germany	Bayern	Erlangen, Stadt/Meilwald	49.6109	11.0382	311	1940-04-30	1	0	Warncke, Klaus		Voith, Johannes (Bayerisches Landesamt für Umwelt (2019): Artenschutzkartierung Bayern) (personal communication)		Warncke, Klaus
Osmia uncinata Gerstäcker, 1869	Germany	Bayern	Erlangen, Stadt/Meilwald	49.6109	11.0382	311	1942-05-16	0	1	Stöckhert	Zoologische Staatssammlung München (ZSM)	Voith, Johannes (Bayerisches Landesamt für Umwelt (2019): Artenschutzkartierung Bayern) (personal communication)		Haeseler, Volker
Osmia uncinata Gerstäcker, 1869	Germany	Bayern	Erlangen, Stadt/Meilwald	49.6109	11.0382	311	1944-05-28	0	1	Stöckhert	Zoologische Staatssammlung München (ZSM)	Voith, Johannes (Bayerisches Landesamt für Umwelt (2019): Artenschutzkartierung Bayern) (personal communication)		Haeseler, Volker
Osmia uncinata Gerstäcker, 1869	Germany	Bayern	Erlangen, Stadt/Meilwald	49.6109	11.0382	311	1945-05-12	0	1	Stöckhert	Zoologische Staatssammlung München (ZSM)	Voith, Johannes (Bayerisches Landesamt für Umwelt (2019): Artenschutzkartierung Bayern) (personal communication)		Haeseler, Volker
Osmia uncinata Gerstäcker, 1869	Germany	Bayern	Erlangen, Stadt/Meilwald	49.6109	11.0382	311	1946-04-16	1	1	Stöckhert	Zoologische Staatssammlung München (ZSM)	Voith, Johannes (Bayerisches Landesamt für Umwelt (2019): Artenschutzkartierung Bayern) (personal communication)
Osmia uncinata Gerstäcker, 1869	Germany	Bayern	Erlangen, Stadt/Meilwald	49.6109	11.0382	311	1946-04-20	0	1	Warncke, Klaus		Voith, Johannes (Bayerisches Landesamt für Umwelt (2019): Artenschutzkartierung Bayern) (personal communication)		Warncke, Klaus
Osmia uncinata Gerstäcker, 1869	Germany	Bayern	Erlangen, Stadt/Meilwald	49.6109	11.0382	311	1947-04-25	0	1	Stöckhert	Zoologische Staatssammlung München (ZSM)	Voith, Johannes (Bayerisches Landesamt für Umwelt (2019): Artenschutzkartierung Bayern) (personal communication)		Haeseler, Volker
Osmia uncinata Gerstäcker, 1869	Germany	Bayern	Erlangen, Stadt/Meilwald	49.6109	11.0382	311	1947-05-16	0	1	Warncke, Klaus		Voith, Johannes (Bayerisches Landesamt für Umwelt (2019): Artenschutzkartierung Bayern) (personal communication)		Warncke, Klaus
Osmia uncinata Gerstäcker, 1869	Germany	Bayern	Erlangen, Stadt/Meilwald	49.6109	11.0382	311	1950-05-09	0	1	Stöckhert	Zoologische Staatssammlung München (ZSM)	Voith, Johannes (Bayerisches Landesamt für Umwelt (2019): Artenschutzkartierung Bayern) (personal communication)		Haeseler, Volker
Osmia uncinata Gerstäcker, 1869	Germany	Bayern	Erlangen, Stadt/Meilwald	49.6109	11.0382	311	1953-03-26	1	0	Stöckhert	Zoologische Staatssammlung München (ZSM)	Voith, Johannes (Bayerisches Landesamt für Umwelt (2019): Artenschutzkartierung Bayern) (personal communication)		Haeseler, Volker
Osmia uncinata Gerstäcker, 1869	Germany	Bayern	Erlangen, Stadt/Meilwald	49.6109	11.0382	311	1954-05-25	0	1	Stöckhert	Zoologische Staatssammlung München (ZSM)	Voith, Johannes (Bayerisches Landesamt für Umwelt (2019): Artenschutzkartierung Bayern) (personal communication)		Haeseler, Volker
Osmia uncinata Gerstäcker, 1869	Germany	Bayern	Erlangen, Stadt/Meilwald	49.6109	11.0382	311	1954-06-12	0	1	Stöckhert	Zoologische Staatssammlung München (ZSM)	Voith, Johannes (Bayerisches Landesamt für Umwelt (2019): Artenschutzkartierung Bayern) (personal communication)		Haeseler, Volker
Osmia uncinata Gerstäcker, 1869	Germany	Bayern	Erlangen, Stadt/Noerdlich Erlangen-Buechenbach	49.6041	10.9721	282	1916-05-07	0	1	Warncke, Klaus		Voith, Johannes (Bayerisches Landesamt für Umwelt (2019): Artenschutzkartierung Bayern) (personal communication)		Warncke, Klaus
Osmia uncinata Gerstäcker, 1869	Germany	Bayern	Erlangen/Frauenaurach Klosterwald	49.5689	10.9532		2000-06-12	0	1	Blösch, Manfred	Zoologische Staatssammlung München (ZSM)	Schmidt, Stefan Zoologische Staatssammlung München (ZSM)		Blösch, Manfred
Osmia uncinata Gerstäcker, 1869	Germany	Bayern	Erlangen/Steudach	49.5784	10.9436		2004-06-10	0	1	Blösch, Manfred	Zoologische Staatssammlung München (ZSM)	Schmidt, Stefan Zoologische Staatssammlung München (ZSM)		Blösch, Manfred
Osmia uncinata Gerstäcker, 1869	Germany	Bayern	Erlangen/Steudach	49.5784	10.9436		2008-04-23	1	0	Blösch, Manfred	Zoologische Staatssammlung München (ZSM)	Schmidt, Stefan Zoologische Staatssammlung München (ZSM)		Blösch, Manfred
Osmia uncinata Gerstäcker, 1869	Germany	Bayern	Erlangen-Höchstadt/Ehem. Sandgrube Ca. 3Km Sw Kalchreuth An Der Erh6, "Rosig-Sandgrube"	49.5433	11.0938	333	1986-05-23	0	2	Warncke, Klaus		Voith, Johannes (Bayerisches Landesamt für Umwelt (2019): Artenschutzkartierung Bayern) (personal communication)		Warncke, Klaus
Osmia uncinata Gerstäcker, 1869	Germany	Bayern	Erlangen-Höchstadt/Nw Spardorf	49.6129	11.0504	334	1913-05-01	0	1	Warncke, Klaus		Voith, Johannes (Bayerisches Landesamt für Umwelt (2019): Artenschutzkartierung Bayern) (personal communication)		Warncke, Klaus
Osmia uncinata Gerstäcker, 1869	Germany	Bayern	Erlangen-Höchstadt/Nw Spardorf	49.6129	11.0504	334	1915-05-01	1	0	Warncke, Klaus		Voith, Johannes (Bayerisches Landesamt für Umwelt (2019): Artenschutzkartierung Bayern) (personal communication)		Warncke, Klaus
Osmia uncinata Gerstäcker, 1869	Germany	Bayern	Erlangen-Höchstadt/Nw Spardorf	49.6129	11.0504	334	1916-04-02	20	0	Warncke, Klaus		Voith, Johannes (Bayerisches Landesamt für Umwelt (2019): Artenschutzkartierung Bayern) (personal communication)		Warncke, Klaus
Osmia uncinata Gerstäcker, 1869	Germany	Bayern	Erlangen-Höchstadt/Nw Spardorf	49.6129	11.0504	334	1916-04-26	10	20	Warncke, Klaus		Voith, Johannes (Bayerisches Landesamt für Umwelt (2019): Artenschutzkartierung Bayern) (personal communication)		Warncke, Klaus
Osmia uncinata Gerstäcker, 1869	Germany	Bayern	Erlangen-Höchstadt/Nw Spardorf	49.6129	11.0504	334	1916-05-19	5	50	Warncke, Klaus		Voith, Johannes (Bayerisches Landesamt für Umwelt (2019): Artenschutzkartierung Bayern) (personal communication)		Warncke, Klaus
Osmia uncinata Gerstäcker, 1869	Germany	Bayern	Erlangen-Höchstadt/Nw Spardorf	49.6129	11.0504	334	1916-05-20	0	5	Warncke, Klaus		Voith, Johannes (Bayerisches Landesamt für Umwelt (2019): Artenschutzkartierung Bayern) (personal communication)		Warncke, Klaus
Osmia uncinata Gerstäcker, 1869	Germany	Bayern	Erlangen-Höchstadt/Nw Spardorf	49.6129	11.0504	334	1916-06-24	0	1	Warncke, Klaus		Voith, Johannes (Bayerisches Landesamt für Umwelt (2019): Artenschutzkartierung Bayern) (personal communication)		Warncke, Klaus
Osmia uncinata Gerstäcker, 1869	Germany	Bayern	Erlangen-Höchstadt/Nw Spardorf	49.6129	11.0504	334	1916-07-30	0	1	Warncke, Klaus		Voith, Johannes (Bayerisches Landesamt für Umwelt (2019): Artenschutzkartierung Bayern) (personal communication)		Warncke, Klaus
Osmia uncinata Gerstäcker, 1869	Germany	Bayern	Erlangen-Höchstadt/Nw Spardorf	49.6129	11.0504	334	1917-05-13	0	5	Warncke, Klaus		Voith, Johannes (Bayerisches Landesamt für Umwelt (2019): Artenschutzkartierung Bayern) (personal communication)		Warncke, Klaus
Osmia uncinata Gerstäcker, 1869	Germany	Bayern	Erlangen-Höchstadt/Nw Spardorf	49.6129	11.0504	334	1917-05-27	0	5	Warncke, Klaus		Voith, Johannes (Bayerisches Landesamt für Umwelt (2019): Artenschutzkartierung Bayern) (personal communication)		Warncke, Klaus
Osmia uncinata Gerstäcker, 1869	Germany	Bayern	Erlangen-Höchstadt/Nw Spardorf	49.6129	11.0504	334	1918-04-14	0	1	Warncke, Klaus		Voith, Johannes (Bayerisches Landesamt für Umwelt (2019): Artenschutzkartierung Bayern) (personal communication)		Warncke, Klaus
Osmia uncinata Gerstäcker, 1869	Germany	Bayern	Erlangen-Höchstadt/Nw Spardorf	49.6129	11.0504	334	1918-04-29	0	5	Warncke, Klaus		Voith, Johannes (Bayerisches Landesamt für Umwelt (2019): Artenschutzkartierung Bayern) (personal communication)		Warncke, Klaus
Osmia uncinata Gerstäcker, 1869	Germany	Bayern	Erlangen-Höchstadt/Nw Spardorf	49.6129	11.0504	334	1918-04-30	1	0	Warncke, Klaus		Voith, Johannes (Bayerisches Landesamt für Umwelt (2019): Artenschutzkartierung Bayern) (personal communication)		Warncke, Klaus
Osmia uncinata Gerstäcker, 1869	Germany	Bayern	Erlangen-Höchstadt/Nw Spardorf	49.6129	11.0504	334	1918-05-17	0	2	Warncke, Klaus		Voith, Johannes (Bayerisches Landesamt für Umwelt (2019): Artenschutzkartierung Bayern) (personal communication)		Warncke, Klaus
Osmia uncinata Gerstäcker, 1869	Germany	Bayern	Erlangen-Höchstadt/Nw Spardorf	49.6129	11.0504	334	1918-05-18	0	20	Warncke, Klaus		Voith, Johannes (Bayerisches Landesamt für Umwelt (2019): Artenschutzkartierung Bayern) (personal communication)		Warncke, Klaus
Osmia uncinata Gerstäcker, 1869	Germany	Bayern	Erlangen-Höchstadt/Nw Spardorf	49.6129	11.0504	334	1919-05-13	0	1	Warncke, Klaus		Voith, Johannes (Bayerisches Landesamt für Umwelt (2019): Artenschutzkartierung Bayern) (personal communication)		Warncke, Klaus
Osmia uncinata Gerstäcker, 1869	Germany	Bayern	Erlangen-Höchstadt/Nw Spardorf	49.6129	11.0504	334	1919-05-14	0	1	Warncke, Klaus		Voith, Johannes (Bayerisches Landesamt für Umwelt (2019): Artenschutzkartierung Bayern) (personal communication)		Warncke, Klaus
Osmia uncinata Gerstäcker, 1869	Germany	Bayern	Erlangen-Höchstadt/Nw Spardorf	49.6129	11.0504	334	1919-05-29	0	20	Warncke, Klaus		Voith, Johannes (Bayerisches Landesamt für Umwelt (2019): Artenschutzkartierung Bayern) (personal communication)		Warncke, Klaus
Osmia uncinata Gerstäcker, 1869	Germany	Bayern	Erlangen-Höchstadt/Nw Spardorf	49.6129	11.0504	334	1919-06-01	1	0	Warncke, Klaus		Voith, Johannes (Bayerisches Landesamt für Umwelt (2019): Artenschutzkartierung Bayern) (personal communication)		Warncke, Klaus
Osmia uncinata Gerstäcker, 1869	Germany	Bayern	Erlangen-Höchstadt/Nw Spardorf	49.6129	11.0504	334	1919-06-08	0	10	Warncke, Klaus		Voith, Johannes (Bayerisches Landesamt für Umwelt (2019): Artenschutzkartierung Bayern) (personal communication)		Warncke, Klaus
Osmia uncinata Gerstäcker, 1869	Germany	Bayern	Erlangen-Höchstadt/Nw Spardorf	49.6129	11.0504	334	1919-06-09	0	10	Warncke, Klaus		Voith, Johannes (Bayerisches Landesamt für Umwelt (2019): Artenschutzkartierung Bayern) (personal communication)		Warncke, Klaus
Osmia uncinata Gerstäcker, 1869	Germany	Bayern	Erlangen-Höchstadt/Nw Spardorf	49.6129	11.0504	334	1924-06-29	0	10	Warncke, Klaus		Voith, Johannes (Bayerisches Landesamt für Umwelt (2019): Artenschutzkartierung Bayern) (personal communication)		Warncke, Klaus
Osmia uncinata Gerstäcker, 1869	Germany	Bayern	Erlangen-Höchstadt/Rathsberg	49.6164	11.0174	324	1916-04-01	5	0	Warncke, Klaus		Voith, Johannes (Bayerisches Landesamt für Umwelt (2019): Artenschutzkartierung Bayern) (personal communication)		Warncke, Klaus
Osmia uncinata Gerstäcker, 1869	Germany	Bayern	Erlangen-Höchstadt/Rathsberg	49.6164	11.0174	324	1916-04-08	5	0	Warncke, Klaus		Voith, Johannes (Bayerisches Landesamt für Umwelt (2019): Artenschutzkartierung Bayern) (personal communication)		Warncke, Klaus
Osmia uncinata Gerstäcker, 1869	Germany	Bayern	Erlangen-Höchstadt/Rathsberg	49.6164	11.0174	324	1917-05-10	10	0	Warncke, Klaus		Voith, Johannes (Bayerisches Landesamt für Umwelt (2019): Artenschutzkartierung Bayern) (personal communication)		Warncke, Klaus
Osmia uncinata Gerstäcker, 1869	Germany	Bayern	Etzelwang	49.5284	11.5861		1992-05-24	0	0			Wickl, Karl-Heinz (1999): Bemerkenswerte Vorkommen von Bienen, Wespen und Ameisen in Sandgebieten der Oberpfalz (Hymenoptera Aculeata) – Galathea, Berichte des Kreises Nürnberger Entomologen e.V. – 15: 95 - 119.
Osmia uncinata Gerstäcker, 1869	Germany	Bayern	Forchheim/Erlangen-Atzelsberg W	49.6287	11.0387	340	1917-05-29	0	5	Warncke, Klaus		Voith, Johannes (Bayerisches Landesamt für Umwelt (2019): Artenschutzkartierung Bayern) (personal communication)		Warncke, Klaus
Osmia uncinata Gerstäcker, 1869	Germany	Bayern	Forchheim/Magerrasen Östlich Großenohe	49.6743	11.296	441	00.00.2010	0	0	Hopfenmüller, Sebastian		Voith, Johannes (Bayerisches Landesamt für Umwelt (2019): Artenschutzkartierung Bayern) (personal communication)		Hopfenmüller, Sebastian
Osmia uncinata Gerstäcker, 1869	Germany	Bayern	Forchheim/Walberla Bei Schlaifhausen	49.7181	11.154	442	1988-05-25	0	1	Warncke, Klaus		Voith, Johannes (Bayerisches Landesamt für Umwelt (2019): Artenschutzkartierung Bayern) (personal communication)		Warncke, Klaus
Osmia uncinata Gerstäcker, 1869	Germany	Bayern	Frankenried Bei Kaufbeuren	47.87	10.66		2013-06-09	0	1	Herb, Albert	Herb, Albert	Herb, Albert (personal communication)		Schmid-Egger, Christian
Osmia uncinata Gerstäcker, 1869	Germany	Bayern	Freising/Hochwasserdamm 500 M Nördlich Volkmannsdorferau	48.5002	11.9594	410	1995-06-20	0	1	Scheuchl, Erwin		Voith, Johannes (Bayerisches Landesamt für Umwelt (2019): Artenschutzkartierung Bayern) (personal communication)		Scheuchl Erwin
Osmia uncinata Gerstäcker, 1869	Germany	Bayern	Freising/Mallertshofer Holz S Eching - Lichtung Im Östl. Mallertshofer Holz	48.2773	11.6215	474	1981-05-19	0	1	Warncke, Klaus		Voith, Johannes (Bayerisches Landesamt für Umwelt (2019): Artenschutzkartierung Bayern) (personal communication)		Warncke, Klaus
Osmia uncinata Gerstäcker, 1869	Germany	Bayern	Freising/Mallertshofer Holz S Eching - Lichtung Im Östl. Mallertshofer Holz	48.2773	11.6215	474	1981-05-30	0	2	Warncke, Klaus		Voith, Johannes (Bayerisches Landesamt für Umwelt (2019): Artenschutzkartierung Bayern) (personal communication)		Warncke, Klaus
Osmia uncinata Gerstäcker, 1869	Germany	Bayern	Freising/Mallertshofer Holz S Eching - Lichtung Im Östl. Mallertshofer Holz	48.2773	11.6215	474	1982-05-27	0	1	Warncke, Klaus		Voith, Johannes (Bayerisches Landesamt für Umwelt (2019): Artenschutzkartierung Bayern) (personal communication)		Warncke, Klaus
Osmia uncinata Gerstäcker, 1869	Germany	Bayern	Fürth, Stadt/Fuerth - Burgfarrnbach	49.4877	10.9257	300	1946-04-20	0	1	Stöckhert	Oberösterreichisches Landesmuseum Linz - Warnke-Sammlung	Oberösterreichisches Landesmuseum Linz		Warncke, Klaus
Osmia uncinata Gerstäcker, 1869	Germany	Bayern	Fürth, Stadt/Fuerth - Espan	49.4774	11.001	285	1918-05-31	0	1	Warncke, Klaus		Voith, Johannes (Bayerisches Landesamt für Umwelt (2019): Artenschutzkartierung Bayern) (personal communication)		Warncke, Klaus
Osmia uncinata Gerstäcker, 1869	Germany	Bayern	Fürth, Stadt/Fuerth - Espan	49.4774	11.001	285	1951-04-23	1	0	Warncke, Klaus		Voith, Johannes (Bayerisches Landesamt für Umwelt (2019): Artenschutzkartierung Bayern) (personal communication)		Warncke, Klaus
Osmia uncinata Gerstäcker, 1869	Germany	Bayern	Fürth, Stadt/Fuerth - Espan	49.4774	11.001	285	1954-04-28	2	0	Warncke, Klaus		Voith, Johannes (Bayerisches Landesamt für Umwelt (2019): Artenschutzkartierung Bayern) (personal communication)		Warncke, Klaus
Osmia uncinata Gerstäcker, 1869	Germany	Bayern	Fürth/Zirndorf	49.4367	10.9454	296	00.00.1919	0	5	Warncke, Klaus		Voith, Johannes (Bayerisches Landesamt für Umwelt (2019): Artenschutzkartierung Bayern) (personal communication)		Enslin Dr. Eduard
Osmia uncinata Gerstäcker, 1869	Germany	Bayern	Garmisch-Partenkirchen/Friederspitz West	47.494	10.9277	1121	1984-09-03	0	1	Warncke, Klaus		Voith, Johannes (Bayerisches Landesamt für Umwelt (2019): Artenschutzkartierung Bayern) (personal communication)		Warncke, Klaus
Osmia uncinata Gerstäcker, 1869	Germany	Bayern	Garmisch-Partenkirchen/Krün, 3 Km Südlich	47.4851	11.278	874	1984-07-08	0	1	Warncke, Klaus	Oberösterreichisches Landesmuseum Linz - Warnke-Sammlung	Voith, Johannes (Bayerisches Landesamt für Umwelt (2019): Artenschutzkartierung Bayern) (personal communication)		Warncke, Klaus
Osmia uncinata Gerstäcker, 1869	Germany	Bayern	Großer Filz, 2,5 Km O Spiegelau	48.9208	13.3811	750	00.00.2002	0	1			Kuhlmann, Michael & Quest, Michael (2003): Stechimmenzönosen von Moorstandorten und eines Bruchwaldes sowie Ergebnisse einer dreijährigen Daueruntersuchung auf einer isolierten Lichtung im Nationalpark Bayerischer Wald (Hymenoptera, Aculeata). – Nachrichtenblatt der Bayerischen Entomologen – 052: 46 - 59.
Osmia uncinata Gerstäcker, 1869	Germany	Bayern	Haßberge/550M Sse Unterpreppach, Ehem. Standortübungsplatz In Unterpreppach, Gemeinde Ebern	50.093	10.7589	312	1991-05-30	0	2	Mandery, Klaus		Voith, Johannes (Bayerisches Landesamt für Umwelt (2019): Artenschutzkartierung Bayern) (personal communication)		Mandery, Klaus
Osmia uncinata Gerstäcker, 1869	Germany	Bayern	Haßberge/550M Sse Unterpreppach, Ehem. Standortübungsplatz In Unterpreppach, Gemeinde Ebern	50.093	10.7589	312	1991-06-30	0	1	Mandery, Klaus		Voith, Johannes (Bayerisches Landesamt für Umwelt (2019): Artenschutzkartierung Bayern) (personal communication)		Mandery, Klaus
Osmia uncinata Gerstäcker, 1869	Germany	Bayern	Haßberge/550M Sse Unterpreppach, Ehem. Standortübungsplatz In Unterpreppach, Gemeinde Ebern	50.093	10.7589	312	00.07.2004	0	1	Mandery, Klaus		Voith, Johannes (Bayerisches Landesamt für Umwelt (2019): Artenschutzkartierung Bayern) (personal communication)		Mandery, Klaus
Osmia uncinata Gerstäcker, 1869	Germany	Bayern	Haßberge/Tümpel 900M Ssw Unterpreppach, Ehem. Standortübungsplatz In Unterpreppach, Gemeinde Ebern	50.0902	10.7538	323	00.06.2004	0	1	Mandery, Klaus		Voith, Johannes (Bayerisches Landesamt für Umwelt (2019): Artenschutzkartierung Bayern) (personal communication)		Mandery, Klaus
Osmia uncinata Gerstäcker, 1869	Germany	Bayern	Heroldsberg (Käferfalle)	49.532	11.1542		1987-04-28	1	0	v. d. Dunk	Oberösterreichisches Landesmuseum Linz	Oberösterreichisches Landesmuseum Linz		Haeseler, Volker
Osmia uncinata Gerstäcker, 1869	Germany	Bayern	Kallmünz (Lkr. R)	49.1605	11.9594		1994-05-14	0	0			Wickl, Karl-Heinz (1999): Bemerkenswerte Vorkommen von Bienen, Wespen und Ameisen in Sandgebieten der Oberpfalz (Hymenoptera Aculeata) – Galathea, Berichte des Kreises Nürnberger Entomologen e.V. – 15: 95 - 119.
Osmia uncinata Gerstäcker, 1869	Germany	Bayern	Karlstadt am Main	49.9667	9.76667		1936-05-10	0	1	Heinrich	Zoologische Staatssammlung München (ZSM)	Schmidt, Stefan Zoologische Staatssammlung München (ZSM)		Haeseler, Volker
Osmia uncinata Gerstäcker, 1869	Germany	Bayern	Karlstadt am Main	49.9667	9.76667		1948-04-25	0	0		Wolf	Global Biodiversity Information Facility
Osmia uncinata Gerstäcker, 1869	Germany	Bayern	Kelheim/Gadens, N	48.8122	11.8663	370	1941-06-05	0	1	Warncke, Klaus		Voith, Johannes (Bayerisches Landesamt für Umwelt (2019): Artenschutzkartierung Bayern) (personal communication)		Warncke, Klaus
Osmia uncinata Gerstäcker, 1869	Germany	Bayern	Kelheim/Gadens, N	48.8122	11.8663	370	1942-05-16	0	1	Warncke, Klaus		Voith, Johannes (Bayerisches Landesamt für Umwelt (2019): Artenschutzkartierung Bayern) (personal communication)		Warncke, Klaus
Osmia uncinata Gerstäcker, 1869	Germany	Bayern	Kelheim/Gadens, N	48.8122	11.8663	370	1946-05-09	0	1	Warncke, Klaus		Voith, Johannes (Bayerisches Landesamt für Umwelt (2019): Artenschutzkartierung Bayern) (personal communication)		Warncke, Klaus
Osmia uncinata Gerstäcker, 1869	Germany	Bayern	Kelheim/Riedenburg, - Dieterzhofener Berg	48.9691	11.6958	505	1920-04-17	1	1	Stöckhert	Zoologische Staatssammlung München (ZSM)	Voith, Johannes (Bayerisches Landesamt für Umwelt (2019): Artenschutzkartierung Bayern) (personal communication)		Peters, D. S.
Osmia uncinata Gerstäcker, 1869	Germany	Bayern	Kelheim/Riedenburg, - Dieterzhofener Berg	48.9691	11.6958	505	1920-05-13	0	1	Stöckhert	Oberösterreichisches Landesmuseum Linz - Warnke-Sammlung	Oberösterreichisches Landesmuseum Linz		Haeseler, Volker
Osmia uncinata Gerstäcker, 1869	Germany	Bayern	Kelheim/Siegenburg-Dassfeld, Binnendüne	48.7603	11.8395	381	1971-05-22	0	1	Necker	Zoologische Staatssammlung München (ZSM)	Voith, Johannes (Bayerisches Landesamt für Umwelt (2019): Artenschutzkartierung Bayern) (personal communication)		Haeseler, Volker
Osmia uncinata Gerstäcker, 1869	Germany	Bayern	Kitzingen/Süd- Bis Südostexponierter Kiefernwaldrand Des Linkhöf-Tännigs S Dimbach, Ca. 2500 M Ne Schwarzach A. M.	49.8229	10.2519	212	1987-04-28	1	0	Bausenwein		Voith, Johannes (Bayerisches Landesamt für Umwelt (2019): Artenschutzkartierung Bayern) (personal communication)		Bausenwein, N.N.
Osmia uncinata Gerstäcker, 1869	Germany	Bayern	Kulmbach/Magerrasen Zwischen Schirradorf Und Azendorf	50.0163	11.307	446	00.00.2010	0	0	Hopfenmüller, Sebastian		Voith, Johannes (Bayerisches Landesamt für Umwelt (2019): Artenschutzkartierung Bayern) (personal communication)		Hopfenmüller, Sebastian
Osmia uncinata Gerstäcker, 1869	Germany	Bayern	Kulmbach/Sandgruben Bei Pechgraben (Sandgrube Dietz)	50.0092	11.5406	406	1994-04-24	0	1	Will, Dietmar		Voith, Johannes (Bayerisches Landesamt für Umwelt (2019): Artenschutzkartierung Bayern) (personal communication)		Hartmann, Peter
Osmia uncinata Gerstäcker, 1869	Germany	Bayern	Landshut, Stadt/Ehem. Sandgrube, Ca. 800 M W Frauenberg. Altgrasflur	48.5666	12.2323	418	1994-03-28	1	0	Scheuchl, Erwin	Scheuchl, Erwin	Voith, Johannes (Bayerisches Landesamt für Umwelt (2019): Artenschutzkartierung Bayern) (personal communication)		Scheuchl Erwin
Osmia uncinata Gerstäcker, 1869	Germany	Bayern	Landshut, Stadt; Landshut/Magerrasen 500M Nordöstlich Schweinbach Hohlweg Am Waldrand, Wiesen	48.5485	12.2157	446	1993-05-06	0	1	Scheuchl, Erwin		Voith, Johannes (Bayerisches Landesamt für Umwelt (2019): Artenschutzkartierung Bayern) (personal communication)		Scheuchl Erwin
Osmia uncinata Gerstäcker, 1869	Germany	Bayern	Landshut, Stadt; Landshut/Magerrasen 500M Nordöstlich Schweinbach Hohlweg Am Waldrand, Wiesen	48.5485	12.2157	446	1994-05-24	0	1	Scheuchl, Erwin		Voith, Johannes (Bayerisches Landesamt für Umwelt (2019): Artenschutzkartierung Bayern) (personal communication)		Scheuchl Erwin
Osmia uncinata Gerstäcker, 1869	Germany	Bayern	Landshut/Kiesgrube 500 M Südwestlich Bruckberg	48.5198	11.9831	431	1993-04-21	0	1	Scheuchl, Erwin	Scheuchl, Erwin	Voith, Johannes (Bayerisches Landesamt für Umwelt (2019): Artenschutzkartierung Bayern) (personal communication)		Scheuchl Erwin
Osmia uncinata Gerstäcker, 1869	Germany	Bayern	Landshut/Kiesgruben Bei Schlossberg, 2Km Sw Von Landshut-Achdorf	48.5137	12.1134	437	1991-06-25	0	1	Scheuchl, Erwin		Voith, Johannes (Bayerisches Landesamt für Umwelt (2019): Artenschutzkartierung Bayern) (personal communication)		Scheuchl Erwin
Osmia uncinata Gerstäcker, 1869	Germany	Bayern	Lechaue 3 Km E Augsburg-Haunstetten, Alter Schiessplatz	48.3	10.94		2006-06-26	0	1	Schmid-Egger, Christian	Schmid-Egger, Christian	Schmid-Egger, Christian (personal communication)
Osmia uncinata Gerstäcker, 1869	Germany	Bayern	Lechstaustufe Kinsau, 18 Km S Landsberg	47.89	10.92			0	0	Sorg	Sorg
Osmia uncinata Gerstäcker, 1869	Germany	Bayern	Lichtenfels/Kalkberg Und Theisenberg Südlich Weismain (Ort); Zwischen Dem Tal Des Weismains Und Der Krassach; Südlich Begrenzt Durch Die Kreisstraße 12	50.0714	11.2358	454	00.00.1996	0	0	Jansen, Stefan		Voith, Johannes (Bayerisches Landesamt für Umwelt (2019): Artenschutzkartierung Bayern) (personal communication)		Jansen Stefan
Osmia uncinata Gerstäcker, 1869	Germany	Bayern	Lichtenfels/Mit Kiefern Verbuschter Magerrasen Nordwestl. Des Kalkberggipfels, Auf Flurstück 1255	50.0774	11.2398	433	00.00.1996	0	0	Anca, Mihaela		Voith, Johannes (Bayerisches Landesamt für Umwelt (2019): Artenschutzkartierung Bayern) (personal communication)		Jansen Stefan
Osmia uncinata Gerstäcker, 1869	Germany	Bayern	Lichtenfels/Wallersberg	50.0431	11.2194	382	1986-06-18	1	2	Warncke, Klaus		Voith, Johannes (Bayerisches Landesamt für Umwelt (2019): Artenschutzkartierung Bayern) (personal communication)		Warncke, Klaus
Osmia uncinata Gerstäcker, 1869	Germany	Bayern	Main-Spessart/Lohr, Romberg	49.9836	9.59683	200	1964-05-16	2	0	Warncke, Klaus		Voith, Johannes (Bayerisches Landesamt für Umwelt (2019): Artenschutzkartierung Bayern) (personal communication)		Warncke, Klaus
Osmia uncinata Gerstäcker, 1869	Germany	Bayern	Main-Spessart/Nsg Grainberg-Kalbenstein - Süd (Vgl. Nsg-Abgrenzung), Gambach	49.9912	9.76308	199	1936-05-09	0	1	Freese N.N.		Voith, Johannes (Bayerisches Landesamt für Umwelt (2019): Artenschutzkartierung Bayern) (personal communication)		Warncke, Klaus
Osmia uncinata Gerstäcker, 1869	Germany	Bayern	Main-Spessart/Nsg Grainberg-Kalbenstein - Süd (Vgl. Nsg-Abgrenzung), Gambach	49.9912	9.76308	199	1936-05-10	0	1	Freese N.N.		Voith, Johannes (Bayerisches Landesamt für Umwelt (2019): Artenschutzkartierung Bayern) (personal communication)		Warncke, Klaus
Osmia uncinata Gerstäcker, 1869	Germany	Bayern	Main-Spessart/Nsg Grainberg-Kalbenstein - Süd (Vgl. Nsg-Abgrenzung), Gambach	49.9912	9.76308	199	1952-05-02	0	1	Freese N.N.		Voith, Johannes (Bayerisches Landesamt für Umwelt (2019): Artenschutzkartierung Bayern) (personal communication)		Warncke, Klaus
Osmia uncinata Gerstäcker, 1869	Germany	Bayern	Main-Spessart/Nsg Grainberg-Kalbenstein - Süd (Vgl. Nsg-Abgrenzung), Gambach	49.9912	9.76308	199	1952-05-07	0	1	Freese N.N.		Voith, Johannes (Bayerisches Landesamt für Umwelt (2019): Artenschutzkartierung Bayern) (personal communication)		Warncke, Klaus
Osmia uncinata Gerstäcker, 1869	Germany	Bayern	Miesbach/Kreuth	47.646	11.7442	780	00.00.1913	0	1	von Rosen	Zoologische Staatssammlung München (ZSM)	Voith, Johannes (Bayerisches Landesamt für Umwelt (2019): Artenschutzkartierung Bayern) (personal communication)		Haeseler, Volker
Osmia uncinata Gerstäcker, 1869	Germany	Bayern	Miltenberg	49.7039	9.2644		1957-06-02	0	0	Heinrich, J.	National Pollinating Insects Collection, Labor für Bienenbiologie und -systematik, Utah State University, Logan, UT, USA	Global Biodiversity Information Facility
Osmia uncinata Gerstäcker, 1869	Germany	Bayern	Miltenberg/Klingenberg/Mil	49.7882	9.18998	279	1958-06-02	0	1	Warncke, Klaus		Voith, Johannes (Bayerisches Landesamt für Umwelt (2019): Artenschutzkartierung Bayern) (personal communication)		Warncke, Klaus
Osmia uncinata Gerstäcker, 1869	Germany	Bayern	Miltenberg/Miltenberg	49.7225	9.24466	195	1957-06-02	0	2	Warncke, Klaus		Voith, Johannes (Bayerisches Landesamt für Umwelt (2019): Artenschutzkartierung Bayern) (personal communication)		Warncke, Klaus
Osmia uncinata Gerstäcker, 1869	Germany	Bayern	Miltenberg/Waldrand "Am Waibling" Zwischen Kleinwallstadt Und Hofstetten	49.8656	9.18526	152	1991-05-27	0	1	Scharrer, Steffen		Voith, Johannes (Bayerisches Landesamt für Umwelt (2019): Artenschutzkartierung Bayern) (personal communication)		Scharrer Steffen
Osmia uncinata Gerstäcker, 1869	Germany	Bayern	Miltenberg/Waldrand Am Winterhafen Bei Erlenbach	49.8195	9.14071	123	1991-05-13	0	1	Scharrer, Steffen		Voith, Johannes (Bayerisches Landesamt für Umwelt (2019): Artenschutzkartierung Bayern) (personal communication)		Scharrer Steffen
Osmia uncinata Gerstäcker, 1869	Germany	Bayern	Miltenberg/Waldrand An Der "Orgelwiese" Zwischen Elsenfeld Und Erlenbach	49.8258	9.16432	134	1991-05-29	0	1	Scharrer, Steffen		Voith, Johannes (Bayerisches Landesamt für Umwelt (2019): Artenschutzkartierung Bayern) (personal communication)		Scharrer Steffen
Osmia uncinata Gerstäcker, 1869	Germany	Bayern	Miltenberg/Waldrand Im "Dachsgrund" Zwischen Elsenfeld Und Rück-Schippach	49.8415	9.19665	169	1991-06-27	0	1	Scharrer, Steffen		Voith, Johannes (Bayerisches Landesamt für Umwelt (2019): Artenschutzkartierung Bayern) (personal communication)		Scharrer Steffen
Osmia uncinata Gerstäcker, 1869	Germany	Bayern	München, Stadt/Allacher Forst	48.2061	11.4755	499	1993-06-11	0	1	Schuberth, Johannes		Voith, Johannes (Bayerisches Landesamt für Umwelt (2019): Artenschutzkartierung Bayern) (personal communication)		Schuberth Johannes
Osmia uncinata Gerstäcker, 1869	Germany	Bayern	München, Stadt/Allacher Forst	48.2061	11.4755	499	1994-04-28	0	1	Schuberth, Johannes		Voith, Johannes (Bayerisches Landesamt für Umwelt (2019): Artenschutzkartierung Bayern) (personal communication)		Schuberth Johannes
Osmia uncinata Gerstäcker, 1869	Germany	Bayern	München, Stadt/Muenchen-Pasing	48.1439	11.4581	533	22.04.1858	0	1	Kriechbaumer, J.	Zoologische Staatssammlung München (ZSM)	Voith, Johannes (Bayerisches Landesamt für Umwelt (2019): Artenschutzkartierung Bayern) (personal communication)		Haeseler, Volker
Osmia uncinata Gerstäcker, 1869	Germany	Bayern	München/Isarauen, Muenchen-Pullach	48.0605	11.5355	572	31.05.1876	0	2	Kriechbaumer, J.	Zoologische Staatssammlung München (ZSM)	Voith, Johannes (Bayerisches Landesamt für Umwelt (2019): Artenschutzkartierung Bayern) (personal communication)		Haeseler, Volker
Osmia uncinata Gerstäcker, 1869	Germany	Bayern	Neuburg-Schrobenhausen/Große Brenne In Der "Felberschütt" 1,8 Km Ö. Staustufe Bergheim	48.7497	11.2987	375	1994-04-02	0	1	Voith, Johannes		Voith, Johannes (Bayerisches Landesamt für Umwelt (2019): Artenschutzkartierung Bayern) (personal communication)		Voith, Johannes
Osmia uncinata Gerstäcker, 1869	Germany	Bayern	Neuburg-Schrobenhausen/Kiefernwald N Gröbern, Verwachsene Flugsanddünen	48.6156	11.3313	430	1990-05-13	0	1	Warncke, Klaus		Voith, Johannes (Bayerisches Landesamt für Umwelt (2019): Artenschutzkartierung Bayern) (personal communication)		Warncke, Klaus
Osmia uncinata Gerstäcker, 1869	Germany	Bayern	Neumarkt I.D.Opf./Biotopkomplex Ca. 500M Nördlich Von Oberhembach	49.3203	11.2615	392	2003-06-28	0	1	Hable, Joachim		Voith, Johannes (Bayerisches Landesamt für Umwelt (2019): Artenschutzkartierung Bayern) (personal communication)		Wickl Dr. Karl - Heinz
Osmia uncinata Gerstäcker, 1869	Germany	Bayern	Neumarkt I.D.Opf./Felskopf Ca. 600M Se" Töging	49.018	11.5695	447	2002-06-12	0	1	Hable, Joachim		Voith, Johannes (Bayerisches Landesamt für Umwelt (2019): Artenschutzkartierung Bayern) (personal communication)		Wickl Dr. Karl - Heinz
Osmia uncinata Gerstäcker, 1869	Germany	Bayern	Neumarkt I.D.Opf./Felskopf Ca. 600M Se" Töging	49.018	11.5695	447	2009-05-15	0	1	Hable, Joachim		Voith, Johannes (Bayerisches Landesamt für Umwelt (2019): Artenschutzkartierung Bayern) (personal communication)		Wickl Dr. Karl - Heinz
Osmia uncinata Gerstäcker, 1869	Germany	Bayern	Neumarkt I.D.Opf./Magerrasen Am "Abgebrannten Berg" Ca. 1Km Östl. Lengenfeld	49.2435	11.6469	551	2002-06-14	0	1	Hable, Joachim		Voith, Johannes (Bayerisches Landesamt für Umwelt (2019): Artenschutzkartierung Bayern) (personal communication)		Wickl Dr. Karl - Heinz
Osmia uncinata Gerstäcker, 1869	Germany	Bayern	Neumarkt I.D.Opf./Magerrasen Am Schanzberg, Nordöstlich Anschließend An Unterwiesenacker	49.2952	11.6207	544	2002-05-08	0	1	Hable, Joachim		Voith, Johannes (Bayerisches Landesamt für Umwelt (2019): Artenschutzkartierung Bayern) (personal communication)		Wickl Dr. Karl - Heinz
Osmia uncinata Gerstäcker, 1869	Germany	Bayern	Neumarkt I.D.Opf./Magerrasen Am Waldsaum Ca. 300M Westl. Altenveldorf	49.2186	11.66	521	2002-05-17	0	1	Hable, Joachim		Voith, Johannes (Bayerisches Landesamt für Umwelt (2019): Artenschutzkartierung Bayern) (personal communication)		Wickl Dr. Karl - Heinz
Osmia uncinata Gerstäcker, 1869	Germany	Bayern	Neumarkt I.D.Opf./Östlich Der Ortschaft Sollngriesbach, Am Ostufer Des Rhein-Main-Donau-Kanals	49.1196	11.4399	388	2008-04-24	1	0	Hable, Joachim		Voith, Johannes (Bayerisches Landesamt für Umwelt (2019): Artenschutzkartierung Bayern) (personal communication)		Wickl Dr. Karl - Heinz
Osmia uncinata Gerstäcker, 1869	Germany	Bayern	Neumarkt I.D.Opf./Rappersdorf Nw	49.1432	11.4443	392	1987-07-11	0	1	Warncke, Klaus		Voith, Johannes (Bayerisches Landesamt für Umwelt (2019): Artenschutzkartierung Bayern) (personal communication)		Warncke, Klaus
Osmia uncinata Gerstäcker, 1869	Germany	Bayern	Neumarkt I.D.Opf./Sandäcker, Sandmagerrasen Und Feuchtwiesen Südöstlich Von Oberhembach (Nördlich Straße Pyrbaum-Oberhembach)	49.3116	11.2714	395	00.00.2003	0	0	Hable, Joachim		Voith, Johannes (Bayerisches Landesamt für Umwelt (2019): Artenschutzkartierung Bayern) (personal communication)		Wickl Dr. Karl - Heinz
Osmia uncinata Gerstäcker, 1869	Germany	Bayern	Neumarkt I.D.Opf./Sande Am Südlich Bis Südwestlich Exponierten Waldsaum Des Wolfsbergs	49.0186	11.6067	367	2003-05-29	0	1	Hable, Joachim		Voith, Johannes (Bayerisches Landesamt für Umwelt (2019): Artenschutzkartierung Bayern) (personal communication)		Wickl Dr. Karl - Heinz
Osmia uncinata Gerstäcker, 1869	Germany	Bayern	Neumarkt I.D.Opf./Südlich Exponierter Waldsaum Ca. 700M Nordwestlich Von Ottmaring	49.0384	11.5299	401	2008-04-17	0	3	Hable, Joachim		Voith, Johannes (Bayerisches Landesamt für Umwelt (2019): Artenschutzkartierung Bayern) (personal communication)		Wickl Dr. Karl - Heinz
Osmia uncinata Gerstäcker, 1869	Germany	Bayern	Neumarkt I.D.Opf./Südlich Exponierter Waldsaum Ca. 700M Nordwestlich Von Ottmaring	49.0384	11.5299	401	2008-06-25	0	1	Hable, Joachim		Voith, Johannes (Bayerisches Landesamt für Umwelt (2019): Artenschutzkartierung Bayern) (personal communication)		Wickl Dr. Karl - Heinz
Osmia uncinata Gerstäcker, 1869	Germany	Bayern	Neumarkt I.D.Opf./Terrassensandgebiet Am Wolfsberg Bei Dietfurt	49.0216	11.6024	361	00.00.2003	0	0	Hable, Joachim		Voith, Johannes (Bayerisches Landesamt für Umwelt (2019): Artenschutzkartierung Bayern) (personal communication)		Wickl Dr. Karl - Heinz
Osmia uncinata Gerstäcker, 1869	Germany	Bayern	Neumarkt I.D.Opf./Waldgebiet Im Einzugsbereich Des "Kirchenbachs" Westlich Von Sollngriesbach	49.1261	11.4081	499	2003-06-04	0	1	Hable, Joachim		Voith, Johannes (Bayerisches Landesamt für Umwelt (2019): Artenschutzkartierung Bayern) (personal communication)		Wickl Dr. Karl - Heinz
Osmia uncinata Gerstäcker, 1869	Germany	Bayern	Neumarkt I.D.Opf./Waldsaum Mit Magerrasenresten Nördlich Von Velburg Nordöstlich Des Schafhofs	49.245	11.668	517	2002-05-13	0	1	Hable, Joachim		Voith, Johannes (Bayerisches Landesamt für Umwelt (2019): Artenschutzkartierung Bayern) (personal communication)		Wickl Dr. Karl - Heinz
Osmia uncinata Gerstäcker, 1869	Germany	Bayern	Neustadt A.D.Waldnaab/Bei Haidenaaltal;Haidenaabtal S Etzenricht Bei Haberstumpfmuehle	49.625	12.0951	390	1989-05-08	0	1	Wickl, Dr. Karl - Heinz		Voith, Johannes (Bayerisches Landesamt für Umwelt (2019): Artenschutzkartierung Bayern) (personal communication)		Warncke, Klaus
Osmia uncinata Gerstäcker, 1869	Germany	Bayern	Nürnberg, Stadt/Nuernberg - Tiergarten	49.4503	11.1417	341	1948-04-23	0	1	Stöckhert	Oberösterreichisches Landesmuseum Linz - Warnke-Sammlung	Oberösterreichisches Landesmuseum Linz		Haeseler, Volker
Osmia uncinata Gerstäcker, 1869	Germany	Bayern	Nürnberg, Stadt/Nuernberg - Tiergarten	49.4503	11.1417	341	1978-04-29	1	0	Kraus, M.	Oberösterreichisches Landesmuseum Linz - Warnke-Sammlung	Oberösterreichisches Landesmuseum Linz		Haeseler, Volker
Osmia uncinata Gerstäcker, 1869	Germany	Bayern	Nürnberg, Stadt/Nuernberg - Tiergarten	49.4503	11.1417	341	1984-05-26	0	1	Warncke, Klaus		Voith, Johannes (Bayerisches Landesamt für Umwelt (2019): Artenschutzkartierung Bayern) (personal communication)		Warncke, Klaus
Osmia uncinata Gerstäcker, 1869	Germany	Bayern	Nürnberg, Stadt/Nuernberg-Flughafen O	49.4989	11.095	316	1977-05-24	1	0	Warncke, Klaus		Voith, Johannes (Bayerisches Landesamt für Umwelt (2019): Artenschutzkartierung Bayern) (personal communication)		Warncke, Klaus
Osmia uncinata Gerstäcker, 1869	Germany	Bayern	Nürnberg, Stadt/Nuernberg-Reichelsdorf	49.3863	11.0282	303	1943-05-06	0	1	Stöckhert	Zoologische Staatssammlung München (ZSM)	Voith, Johannes (Bayerisches Landesamt für Umwelt (2019): Artenschutzkartierung Bayern) (personal communication)		Haeseler, Volker
Osmia uncinata Gerstäcker, 1869	Germany	Bayern	Nürnberger Land/Leuzenberg	49.5344	11.3796	477	1941-05-18	0	1	Warncke, Klaus		Voith, Johannes (Bayerisches Landesamt für Umwelt (2019): Artenschutzkartierung Bayern) (personal communication)		Warncke, Klaus
Osmia uncinata Gerstäcker, 1869	Germany	Bayern	Nürnberger Land/Leuzenberg	49.5344	11.3796	477	1941-06-05	0	1	Warncke, Klaus		Voith, Johannes (Bayerisches Landesamt für Umwelt (2019): Artenschutzkartierung Bayern) (personal communication)		Warncke, Klaus
Osmia uncinata Gerstäcker, 1869	Germany	Bayern	Nürnberger Land/Leuzenberg	49.5344	11.3796	477	1942-05-27	0	1	Warncke, Klaus		Voith, Johannes (Bayerisches Landesamt für Umwelt (2019): Artenschutzkartierung Bayern) (personal communication)		Warncke, Klaus
Osmia uncinata Gerstäcker, 1869	Germany	Bayern	Nürnberger Land/Leuzenberg	49.5344	11.3796	477	1943-05-16	0	2	Warncke, Klaus		Voith, Johannes (Bayerisches Landesamt für Umwelt (2019): Artenschutzkartierung Bayern) (personal communication)		Warncke, Klaus
Osmia uncinata Gerstäcker, 1869	Germany	Bayern	Nürnberger Land/Leuzenberg	49.5344	11.3796	477	1944-05-14	0	1	Warncke, Klaus		Voith, Johannes (Bayerisches Landesamt für Umwelt (2019): Artenschutzkartierung Bayern) (personal communication)		Warncke, Klaus
Osmia uncinata Gerstäcker, 1869	Germany	Bayern	Nürnberger Reichswald an der Gastrasse Zwischen Buchenbühl Und Der Autobahn A3	49.5073	11.1113		2004-05-18	0	0		Kraus, M.	Kraus, M.
Osmia uncinata Gerstäcker, 1869	Germany	Bayern	Oberasbach Nsg Hainberg	49.4269	10.9908		00.00.2001	0	2			Mandery, Klaus (2005): Bienen und Wespen (Hymenoptera: Apocrita) im Hainberg einem außergewöhnlichen Sandlebensraum an der Rednitz, Gde. Oberasbach (Lkr. Fürth) u. Stadt Nürnberg – Galathea, Berichte des Kreises Nürnberger Entomologen e.V. – 21: 167 - 186.
Osmia uncinata Gerstäcker, 1869	Germany	Bayern	Pappenheim	48.9348	10.9701		1930-04-27	1	0	Stöckhert	Zoologische Staatssammlung München (ZSM)	Schmidt, Stefan Zoologische Staatssammlung München (ZSM)		Peters, D. S.
Osmia uncinata Gerstäcker, 1869	Germany	Bayern	Passau, Kastenreuth, Kiesgrube	48.5975	13.4829		2000-04-21	1	0	Scheuchl, Erwin	Scheuchl, Erwin	Scheuchl, Erwin (personal communication)
Osmia uncinata Gerstäcker, 1869	Germany	Bayern	Pfaffenhofen A.D.Ilm/Windsberg O Freinhausen; S-Expon.Hang Zum Paartal	48.6355	11.4439	408	1968-05-10	1	0	Warncke, Klaus		Voith, Johannes (Bayerisches Landesamt für Umwelt (2019): Artenschutzkartierung Bayern) (personal communication)		Warncke, Klaus
Osmia uncinata Gerstäcker, 1869	Germany	Bayern	Regensburg, Stadt/Nsg Keilsteiner Hang (Trockenhänge) Bei Regensburg/Schwabelweis	49.0335	12.1646	439	00.00.1839	1	1	Warncke, Klaus		Voith, Johannes (Bayerisches Landesamt für Umwelt (2019): Artenschutzkartierung Bayern) (personal communication)		Herrich-Schaeffer P.
Osmia uncinata Gerstäcker, 1869	Germany	Bayern	Regensburg/Undorf / Tal Der Schwarzen Laaber	49.0278	11.9238	420	1947-05-11	0	1	Warncke, Klaus		Voith, Johannes (Bayerisches Landesamt für Umwelt (2019): Artenschutzkartierung Bayern) (personal communication)		Warncke, Klaus
Osmia uncinata Gerstäcker, 1869	Germany	Bayern	Rhön-Grabfeld/600 No Geckenau	50.3974	10.2157	340	1992-05-16	0	1	Mandery, Klaus		Voith, Johannes (Bayerisches Landesamt für Umwelt (2019): Artenschutzkartierung Bayern) (personal communication)		Mandery, Klaus
Osmia uncinata Gerstäcker, 1869	Germany	Bayern	Rosenheim/Prien Am Chiemsee	47.8523	12.3569	568	1964-05-07	1	0	Ettlinger	Zoologische Staatssammlung München (ZSM)	Voith, Johannes (Bayerisches Landesamt für Umwelt (2019): Artenschutzkartierung Bayern) (personal communication)		Haeseler, Volker
Osmia uncinata Gerstäcker, 1869	Germany	Bayern	Schwabach, Stadt/Aufgeforstete Heide Unter Stromleitungstrasse Nw V.Sc	49.3468	10.9983	375	1995-05-03	0	2	ANUVA Stadt- und Umweltplanung		Voith, Johannes (Bayerisches Landesamt für Umwelt (2019): Artenschutzkartierung Bayern) (personal communication)		Weber, Klaus
Osmia uncinata Gerstäcker, 1869	Germany	Bayern	Schwabach, Stadt/Aufschüttung Mit Laubabfall In Vogelherd	49.3187	11.0419	354	1995-04-24	1	0	ANUVA Stadt- und Umweltplanung		Voith, Johannes (Bayerisches Landesamt für Umwelt (2019): Artenschutzkartierung Bayern) (personal communication)		Weber, Klaus
Osmia uncinata Gerstäcker, 1869	Germany	Bayern	Schwabach, Stadt/Truppenübungsplatz - Ost	49.3512	11.0108	372	1995-05-23	0	3	ANUVA Stadt- und Umweltplanung		Voith, Johannes (Bayerisches Landesamt für Umwelt (2019): Artenschutzkartierung Bayern) (personal communication)		Weber, Klaus
Osmia uncinata Gerstäcker, 1869	Germany	Bayern	Schwabach, Stadt/Waldr. Bei Penzendorf	49.3354	11.038	330	1995-04-24	0	1	ANUVA Stadt- und Umweltplanung		Voith, Johannes (Bayerisches Landesamt für Umwelt (2019): Artenschutzkartierung Bayern) (personal communication)		Weber, Klaus
Osmia uncinata Gerstäcker, 1869	Germany	Bayern	Schwabach, Stadt/Waldr.S Obermainbach	49.2992	11.0212	354	1995-04-24	2	0	ANUVA Stadt- und Umweltplanung		Voith, Johannes (Bayerisches Landesamt für Umwelt (2019): Artenschutzkartierung Bayern) (personal communication)		Weber, Klaus
Osmia uncinata Gerstäcker, 1869	Germany	Bayern	Schwabach, Stadt/Waldr.S Obermainbach	49.2992	11.0212	354	1995-05-23	0	1	ANUVA Stadt- und Umweltplanung		Voith, Johannes (Bayerisches Landesamt für Umwelt (2019): Artenschutzkartierung Bayern) (personal communication)		Weber, Klaus
Osmia uncinata Gerstäcker, 1869	Germany	Bayern	Schwandorf/Magdalenental Bei Trisching;Tal D.Schwarzenbaches Zw.Grimmenthal U.Badeweiher	49.4529	12.0482	434	1987-07-10	0	1	Wickl, Dr. Karl - Heinz		Voith, Johannes (Bayerisches Landesamt für Umwelt (2019): Artenschutzkartierung Bayern) (personal communication)		Warncke, Klaus
Osmia uncinata Gerstäcker, 1869	Germany	Bayern	Sorg In Oberfranken	49.6968	11.2993		1994-04-22	1	0	Hartmann, Peter	Zoologische Staatssammlung München (ZSM)	Schmidt, Stefan Zoologische Staatssammlung München (ZSM)		Hartmann, Peter
Osmia uncinata Gerstäcker, 1869	Germany	Bayern	Stettkirchen	49.2917	11.8182		1996-06-08	0	0			Wickl, Karl-Heinz (1999): Bemerkenswerte Vorkommen von Bienen, Wespen und Ameisen in Sandgebieten der Oberpfalz (Hymenoptera Aculeata) – Galathea, Berichte des Kreises Nürnberger Entomologen e.V. – 15: 95 - 119.
Osmia uncinata Gerstäcker, 1869	Germany	Bayern	Töging S Dietfurt	49.0177	11.5659		2009-05-15	1	0			Hable, Joachim, von der Dunk, Klaus & Knipfer, Georg (2010): Zur Entomofauna primärer Felsheiden und Blockschutthalden im südlichen Landkreis Neumarkt/Opf – Galathea, Berichte des Kreises Nürnberger Entomologen e.V. – 19_Supp: 1 - 104.
Osmia uncinata Gerstäcker, 1869	Germany	Bayern	Traunstein/Südliche Kendlmühlfilze Nordwestlich Grassau, Kendlmühlfilzen Süd (Torffleck), 650 M N Moosbauer	47.7956	12.4511	532	1970-05-30	1	0	Warncke, Klaus		Voith, Johannes (Bayerisches Landesamt für Umwelt (2019): Artenschutzkartierung Bayern) (personal communication)		Warncke, Klaus
Osmia uncinata Gerstäcker, 1869	Germany	Bayern	Velden (Lkr. Lau)	49.6131	11.5108		1993-05-08	0	0			Wickl, Karl-Heinz (1999): Bemerkenswerte Vorkommen von Bienen, Wespen und Ameisen in Sandgebieten der Oberpfalz (Hymenoptera Aculeata) – Galathea, Berichte des Kreises Nürnberger Entomologen e.V. – 15: 95 - 119.
Osmia uncinata Gerstäcker, 1869	Germany	Bayern	Weißenburg-Gunzenhausen/Magerwiesen Südlich Des Zimmerner Bergs Bis "Drei Linden"	48.9289	10.9809	448	1928-05-06	1	0	Warncke, Klaus		Voith, Johannes (Bayerisches Landesamt für Umwelt (2019): Artenschutzkartierung Bayern) (personal communication)		Warncke, Klaus
Osmia uncinata Gerstäcker, 1869	Germany	Bayern	Weißenburg-Gunzenhausen/Magerwiesen Südlich Des Zimmerner Bergs Bis "Drei Linden"	48.9289	10.9809	448	1930-04-27	1	0	Reich, Michael		Voith, Johannes (Bayerisches Landesamt für Umwelt (2019): Artenschutzkartierung Bayern) (personal communication)		Warncke, Klaus
Osmia uncinata Gerstäcker, 1869	Germany	Bayern	Würzburg/Südhang Und Plateau Des Kreuzberges Se Böttigheim	49.704	9.66374	317	00.00.1991	0	0	Bayerisches Landesamt für Umwelt LfU		Voith, Johannes (Bayerisches Landesamt für Umwelt (2019): Artenschutzkartierung Bayern) (personal communication)		Bausenwein, Dieter
Osmia uncinata Gerstäcker, 1869	Germany	Berlin	Berlin-33-Grunewald	52.4933	13.2433		1991-06-26	0	1	Flügel, Hans Joachim	Flügel, Hans Joachim	Flügel, Hans Joachim (personal communication)		Flügel, Hans Joachim
Osmia uncinata Gerstäcker, 1869	Germany	Berlin	Berliner Bahnbrache Biesenhorster Sand 2002	52.4903	13.5477		00.00.2002	0	0			Ziska, Thomas & Saure, Christoph (2005): Ergebnisse der Untersuchungen zur Insektenfauna auf der Berliner Bahnbrache Biesenhorster Sand - Wespen und Bienen (Hymenoptera part.) – Märkische Entomologische Nachrichten – SH_2005: 77 - 92.
Osmia uncinata Gerstäcker, 1869	Germany	Berlin	Feuchtgebiet Krumme Lake (Berlin-Köpenick) 1999, 2000	52.4002	13.614		00.00.2000	0	0			Ziska, Thomas (2002): Untersuchungen zum Vorkommen von aculeaten Hymenopteren im Feuchtgebiet Krumme Lake – Märkische Entomologische Nachrichten – 2002_1: 1 - 16.
Osmia uncinata Gerstäcker, 1869	Germany	Brandenburg	Bugk-Sandwegrand	52.195	13.9233		1994-05-02	1	0	Flügel, Hans Joachim	Flügel, Hans Joachim	Flügel, Hans Joachim (personal communication)		Flügel, Hans Joachim
Osmia uncinata Gerstäcker, 1869	Germany	Brandenburg	Irrel/Waldsaum	49.8508	6.44944	208	2013-06-05	0	1	Flügel, Hans Joachim	Flügel, Hans Joachim	Flügel, Hans Joachim (personal communication)		Flügel, Hans Joachim
Osmia uncinata Gerstäcker, 1869	Germany	Brandenburg	Kienbaum-Hochsp.trass	52.45	13.95		1994-04-23	1	0	Flügel, Hans Joachim	Flügel, Hans Joachim	Flügel, Hans Joachim (personal communication)		Flügel, Hans Joachim
Osmia uncinata Gerstäcker, 1869	Germany	Brandenburg	Kienbaum-Ölleit.trass	52.4433	13.9383		1994-04-23	1	0	Flügel, Hans Joachim	Flügel, Hans Joachim	Flügel, Hans Joachim (personal communication)		Flügel, Hans Joachim
Osmia uncinata Gerstäcker, 1869	Germany	Brandenburg	Oderberg-Trockenrasen	52.865	14.0183		1994-05-09	0	1	Flügel, Hans Joachim	Flügel, Hans Joachim	Flügel, Hans Joachim (personal communication)		Flügel, Hans Joachim
Osmia uncinata Gerstäcker, 1869	Germany	Brandenburg	Papproth Kiefernforst	51.65	14.25		1995-05-28	0	1	Liebig, Wolf-Harald	Liebig, Wolf-Harald	Liebig, Wolf-Harald (personal communication)		Liebig, Wolf-Harald
Osmia uncinata Gerstäcker, 1869	Germany	Brandenburg	Papproth-Steintzer Alpen	51.6217	14.2631		1994-05-08	0	1	Burger, Frank	Burger, Frank	Burger, Frank (personal communication)
Osmia uncinata Gerstäcker, 1869	Germany	Brandenburg	Pimpinellenberg bei Oderberg und Umgebung 2010	52.8641	14.0207		00.00.2010	0	0			Flügel, Hans Joachim (2010): Wildbienennachweise vom Pimpinellenberg bei Oderberg und Umgebung (Hymenoptera: Apidae) – Entomofauna – 0031: 97 - 112.
Osmia uncinata Gerstäcker, 1869	Germany	Brandenburg	Waldsieversd-Trockenrasen	52.5217	14.0083		1994-04-25	0	1	Flügel, Hans Joachim	Flügel, Hans Joachim	Flügel, Hans Joachim (personal communication)		Flügel, Hans Joachim
Osmia uncinata Gerstäcker, 1869	Germany	Brandenburg	Zauchwitz-Straßenrand	52.2217	13.055		1997-05-17	0	1	Flügel, Hans Joachim	Flügel, Hans Joachim	Flügel, Hans Joachim (personal communication)		Flügel, Hans Joachim
Osmia uncinata Gerstäcker, 1869	Germany	Hessen	Daten aus Museum (Sommer)	51.3594	9.45389		1960-06-05	0	0	Sommer		Tischendorf, Stefan (personal communication)
Osmia uncinata Gerstäcker, 1869	Germany	Hessen	Dudenhofen-Feuchtwiese	50.0064	8.88839		1993-04-22	0	1	Hauser, M.	Hauser, M.	Tischendorf, Stefan (personal communication)
Osmia uncinata Gerstäcker, 1869	Germany	Hessen	Edertal-Königshagen, Sandgrube, Waldrand	51.2008	9.14972		2009-06-13	0	1	Schmalz, K.-H.	Naturkundemuseum Kassel (NKAS)	Schmalz, K.-H. (personal communication)		Schmalz, K.-H.
Osmia uncinata Gerstäcker, 1869	Germany	Hessen	Eichenzell, Haimbuch, Waldweg, Mischwald	50.48	9.69806		1996-07-03	0	1	Schmalz, K.-H.	Vonderau Museum	Schmalz, K.-H. (personal communication)		Riemann
Osmia uncinata Gerstäcker, 1869	Germany	Hessen	Eichenzell-Abtrieb Melterse Wald	50.4946	9.73715		1996-07-03	0	1	Schmalz, K.-H.	Vonderau Museum	Schmalz, K.-H. (personal communication)
Osmia uncinata Gerstäcker, 1869	Germany	Hessen	Eichenzell-Fasanerie, Waldwiese im Wildpark Schloss Fasanerie	50.5008	9.71389		2010-06-04	0	1	Schmalz, K.-H.	Vonderau Museum	Schmalz, K.-H. (personal communication)		Schmalz, K.-H.
Osmia uncinata Gerstäcker, 1869	Germany	Hessen	Eichenzell-Lütter, NSG Mosbachwiesen, Schilf mit Kiefernanflug	50.4747	9.74917		1999-06-11	1	0	Schmalz, K.-H.	Vonderau Museum	Schmalz, K.-H. (personal communication)		Westrich, Paul
Osmia uncinata Gerstäcker, 1869	Germany	Hessen	Eichenzell-Rönshausen, Waldsportplatz, 200 m im Wald	50.4639	9.74306		2000-04-05	1	0	Schmalz, K.-H.	Vonderau Museum	Schmalz, K.-H. (personal communication)		Schmalz, K.-H., Tischendorf
Osmia uncinata Gerstäcker, 1869	Germany	Hessen	Eichenzell-Welkers, Waldweg nahe Waldrand	50.455	9.72944		2002-04-21	1	0	Schmalz, K.-H.	Vonderau Museum	Schmalz, K.-H. (personal communication)		Tischendorf
Osmia uncinata Gerstäcker, 1869	Germany	Hessen	Frankfurt	50.1122	8.68552		1968-04-16	1	0	Wolf, H.	Oberösterreichisches Landesmuseum Linz	Oberösterreichisches Landesmuseum Linz		Haeseler, Volker
Osmia uncinata Gerstäcker, 1869	Germany	Hessen	Frankfurt Bezirk 1-Staatswald	50.0527	8.6164		2001-04-30	1	0	Malten, Andreas	Tischendorf, Stefan	Tischendorf, Stefan (personal communication)		Tischendorf, Stefan
Osmia uncinata Gerstäcker, 1869	Germany	Hessen	Fulda-Harmerz, Heiderain mit Kiefernaufschlag	50.5172	9.64694		2007-06-10	1	0	Schmalz, K.-H.	Uni Gießen	Schmalz, K.-H. (personal communication)		Reder, Gerd
Osmia uncinata Gerstäcker, 1869	Germany	Hessen	Fulda-Nonnenrod, Aschehofer Grund, Wald	50.4972	9.60861		2000-05-10	0	1	Schmalz, K.-H.	Vonderau Museum	Schmalz, K.-H. (personal communication)		Schmalz, K.-H., Westrich
Osmia uncinata Gerstäcker, 1869	Germany	Hessen	Gersfeld, Große Nalle, aufgelassener Basaltsteinbruch im Wald	50.4442	9.88361		2000-05-06	0	1	Schmalz, K.-H.	Vonderau Museum	Schmalz, K.-H. (personal communication)		Schmalz, K.-H.
Osmia uncinata Gerstäcker, 1869	Germany	Hessen	Gersfeld-Altenfeld, Waldrand	50.4542	9.84056		1999-05-29	0	1	Schmalz, K.-H.	Vonderau Museum	Schmalz, K.-H. (personal communication)		Schmalz, K.-H.
Osmia uncinata Gerstäcker, 1869	Germany	Hessen	Herborn OT Seelbach (Bornberg) an Kiefernwaldrand	50.7078	8.34167		2001-05-20	0	1	Frommer, Uli	Frommer, Uli	Frommer, Uli (personal communication)		Frommer, Uli
Osmia uncinata Gerstäcker, 1869	Germany	Hessen	Hohenahr	50.6825	8.53861		00.00.1996	0	0	Hirsch, M.		Tischendorf, Stefan (personal communication)
Osmia uncinata Gerstäcker, 1869	Germany	Hessen	Lampertheim, Viernheimer Heide, Stromtrasse, 1 km SE	49.5613	8.53081		2007-06-07	0	1	Reder, Gerd	Reder, Gerd	Reder, Gerd (personal communication)		Reder, Gerd
Osmia uncinata Gerstäcker, 1869	Germany	Hessen	Marburg (Lahn)	50.8114	8.76861		1948-05-05	0	1	Wolf, H.	Oberösterreichisches Landesmuseum Linz	Oberösterreichisches Landesmuseum Linz		Haeseler, Volker
Osmia uncinata Gerstäcker, 1869	Germany	Hessen	Marburg (Lahn)	50.8114	8.76861		1948-05-06	0	1	Wolf, H.	Oberösterreichisches Landesmuseum Linz	Oberösterreichisches Landesmuseum Linz		Wolf, H.
Osmia uncinata Gerstäcker, 1869	Germany	Hessen	Marburg (Lahn)	50.8114	8.76861		1952-07-01	0	0		Wolf	Global Biodiversity Information Facility
Osmia uncinata Gerstäcker, 1869	Germany	Hessen	Marburg (Lahn)	50.8114	8.76861		1962-06-10	1	0	Wolf, H.	Oberösterreichisches Landesmuseum Linz	Oberösterreichisches Landesmuseum Linz		Haeseler, Volker
Osmia uncinata Gerstäcker, 1869	Germany	Hessen	Marburg (Lahn)	50.8114	8.76861		1970-05-18	0	1	Wolf, H.	Oberösterreichisches Landesmuseum Linz	Oberösterreichisches Landesmuseum Linz		Haeseler, Volker
Osmia uncinata Gerstäcker, 1869	Germany	Hessen	Messel-Ölschiefergrube	49.9073	8.76332		1994-05-03	1	0	Hauser, M.	Hauser, M.	Tischendorf, Stefan (personal communication)
Osmia uncinata Gerstäcker, 1869	Germany	Hessen	Mörfelden	49.9608	8.58187		1999-05-14	0	1	Treiber, Reinhold	Tischendorf, Stefan	Tischendorf, Stefan (personal communication)		Tischendorf, Stefan
Osmia uncinata Gerstäcker, 1869	Germany	Hessen	Mörfelden, zwischen Hegbach und Gänswiese	49.9639	8.59285		00.00.2002	0	0			Tischendorf, Stefan & Treiber, Reinhold (2002): Stechimmen (Hymenoptera, Aculeata) unter Hochspannungsfreileitungen im Rhein-Main-Gebiet – Carolinea - Beiträge zur naturkundlichen Forschung in Südwestdeutschland – 60: 113 - 130.
Osmia uncinata Gerstäcker, 1869	Germany	Hessen	Obervellmar, Rote-Breite-Straße	51.3577	9.45485		1960-06-05	0	0		Sommer	Global Biodiversity Information Facility
Osmia uncinata Gerstäcker, 1869	Germany	Hessen	Pfungstadt	49.8069	8.61009		2009-04-20	1	0	Reder, Gerd	Reder, Gerd	Reder, Gerd (personal communication)
Osmia uncinata Gerstäcker, 1869	Germany	Hessen	Pfungstadt-Weißer Berg, Kiefernwald	49.8295	8.61449		1996-05-25	1	0	Köhler, D.		Tischendorf, Stefan (personal communication)
Osmia uncinata Gerstäcker, 1869	Germany	Hessen	Pfungstadt-Weißer Berg, Kiefernwald	49.8295	8.61449		1997-05-11	0	2	Tischendorf, Stefan	Tischendorf, Stefan	Tischendorf, Stefan (personal communication)		Tischendorf, Stefan
Osmia uncinata Gerstäcker, 1869	Germany	Hessen	Pfungstadt-Weißer Berg, Kiefernwald	49.8295	8.61449		1997-05-14	1	1	Tischendorf, Stefan	Tischendorf, Stefan	Tischendorf, Stefan (personal communication)		Tischendorf, Stefan
Osmia uncinata Gerstäcker, 1869	Germany	Hessen	Pfungstadt-Weißer Berg, Kiefernwald	49.8295	8.61449		1998-05-08	2	1	Tischendorf, Stefan	Tischendorf, Stefan	Tischendorf, Stefan (personal communication)		Tischendorf, Stefan
Osmia uncinata Gerstäcker, 1869	Germany	Hessen	Pfungstadt-Weißer Berg, Kiefernwald	49.8295	8.61449		1999-04-23	1	0	Tischendorf, Stefan	Tischendorf, Stefan	Tischendorf, Stefan (personal communication)		Tischendorf, Stefan
Osmia uncinata Gerstäcker, 1869	Germany	Hessen	Rönshausen-Sportplatz Rönshausen	50.4664	9.74216		2002-04-05	1	0	Schmalz, K.-H.	Vonderau Museum	Schmalz, K.-H. (personal communication)
Osmia uncinata Gerstäcker, 1869	Germany	Niedersachsen	1.8 km NNW gelegenen Wildenloh (Haeseler 1991: 758)	53.1272	8.12384			0	0			v.d. Heide, Andreas (1991): Zum Auftreten von Stechimmen in stillgelegten Abtorfungsflächen eines Hochmoorrestes bei Oldenburg i.O. (Hymenoptera: Aculeata) – Drosera – 1991: 57 - 84.
Osmia uncinata Gerstäcker, 1869	Germany	Niedersachsen	Bärenkopf Solling (4223/3-02,06,07)	51.7315	9.57157		1999-06-14	0	0	Reidt (briefl.)		Theunert, Reiner (personal communication)
Osmia uncinata Gerstäcker, 1869	Germany	Niedersachsen	Celle-Bieneninstitut (3326/4-06)	52.622	10.0845		1994-06-25	0	0	Kribbe (briefl.)		Theunert, Reiner (personal communication)
Osmia uncinata Gerstäcker, 1869	Germany	Niedersachsen	Duhner Heide Cuxhaven (2117/2-07)	53.8726	8.61691		00.00.2009	0	0	Sprichardt, Jennifer		Sprichardt, Jennifer (2011): Bienen und Wespen naturnaher Restheiden im Raum Cuxhaven – Drosera – 2010: 77 - 102.
Osmia uncinata Gerstäcker, 1869	Germany	Niedersachsen	Ems 1,5 km NW Fresenburg (3109/2-02)	52.8907	7.2817		1994-06-14	0	0	Heide (briefl.)		Theunert, Reiner (personal communication)
Osmia uncinata Gerstäcker, 1869	Germany	Niedersachsen	Fintlandsmoor (2813/1-09,10)	53.1709	7.89527		00.00.1973	0	0			Haeseler, V. (1978): Zum Auftreten aculeater Hymenopteren in gestörten Hochmoorresten des Fintlandmoores bei Oldenburg. - Drosera ‘78: 57-76.
Osmia uncinata Gerstäcker, 1869	Germany	Niedersachsen	Ipweger Moor	53.2153	8.28577			0	0			Haeseler, V. (1987): Ameisen, Wespen und Bienen des Ipweger Moores bei Oldenburg i.O. (Hymenoptera, Aculeata). - Braunschw. naturkdl. Sehr. 2: 663-683.
Osmia uncinata Gerstäcker, 1869	Germany	Niedersachsen	Melchiorshausen bei Syke	52.9715	8.79781		10.05.1896	1	0			Alfken, Johann Dietrich (1913-1914): Die Bienenfauna von Bremen. – Abhandlungen des Naturwissenschaftlichen Vereins zu Bremen – 22: 1 - 220.
Osmia uncinata Gerstäcker, 1869	Germany	Niedersachsen	Militärplatz Bümmerstede (2915/1)	53.0774	8.23622		00.00.1996	0	0	Kraatz		Theunert, Reiner (personal communication)
Osmia uncinata Gerstäcker, 1869	Germany	Niedersachsen	Oldenburg Biwakplatz	53.0657	8.23406		1996-05-07	0	1			Kraatz, Oliver (2005): Grabwespen und Bienen eines militärisch genutzten Binnendünengeländes im Nordwesten Niedersachsens (Hymenoptera: Sphecidae, Apidae) – Drosera – 2005: 97 - 126.
Osmia uncinata Gerstäcker, 1869	Germany	Niedersachsen	Oldenburg Grünland	53.0885	8.23514		1996-05-08	0	1			Kraatz, Oliver (2005): Grabwespen und Bienen eines militärisch genutzten Binnendünengeländes im Nordwesten Niedersachsens (Hymenoptera: Sphecidae, Apidae) – Drosera – 2005: 97 - 126.
Osmia uncinata Gerstäcker, 1869	Germany	Niedersachsen	Oldenburg Sanddünen	53.0831	8.2333		1996-06-07	0	2			Kraatz, Oliver (2005): Grabwespen und Bienen eines militärisch genutzten Binnendünengeländes im Nordwesten Niedersachsens (Hymenoptera: Sphecidae, Apidae) – Drosera – 2005: 97 - 126.
Osmia uncinata Gerstäcker, 1869	Germany	Niedersachsen	Oldenburg Sanddünen	53.0831	8.2333		1996-06-10	0	1			Kraatz, Oliver (2005): Grabwespen und Bienen eines militärisch genutzten Binnendünengeländes im Nordwesten Niedersachsens (Hymenoptera: Sphecidae, Apidae) – Drosera – 2005: 97 - 126.
Osmia uncinata Gerstäcker, 1869	Germany	Niedersachsen	Queloh (3226/2-05)	52.7857	10.1773		1994-06-23	0	0	Kribbe (briefl.)		Theunert, Reiner (personal communication)
Osmia uncinata Gerstäcker, 1869	Germany	Niedersachsen	Reiherbachtal Solling (4322/2-05,10)	51.6785	9.4981		1999-06-07	0	0	Reidt (briefl.)		Theunert, Reiner (personal communication)
Osmia uncinata Gerstäcker, 1869	Germany	Niedersachsen	Rekumer Geest (2717/3-13)	53.2126	8.52163		00.00.1986	0	0	Hohmann (Archiv)		Theunert, Reiner (personal communication)
Osmia uncinata Gerstäcker, 1869	Germany	Niedersachsen	Sandgrube Neu Darchau (2731/3-10)	53.2286	10.8822		1996-06-15	0	0	van der Smissen, Jane		van der Smissen, Jane (personal communication)		van der Smissen, Jane
Osmia uncinata Gerstäcker, 1869	Germany	Niedersachsen	Sandgruben Kirchseelte (3017/2-10)	52.9567	8.66376		00.00.1983	0	0	Riemann		Theunert, Reiner (personal communication)
Osmia uncinata Gerstäcker, 1869	Germany	Nordrhein-Westfalen	4611-SW (Sauer und Siegerland)	51.3272	7.54854		00.00.2005	0	0	Drees, Dr. Michael		Drees, M. (2005): Zur Bienenfauna des Raumes Hagen (Hymenoptera: Apidae). Abhandlungen aus dem Westfälischen Museum für Naturkunde 67: Heft 1, 56.
Osmia uncinata Gerstäcker, 1869	Germany	Nordrhein-Westfalen	Bonn, Botanischer Garten	50.7253	7.09299		00.00.1998	0	0	Bischoff, Inge	Zoologisches Forschungsinstitut und Museum Alexander König, Bonn	ZFMK - Hymenoptera Sammlung Abfrage Biodat		Esser, Jürgen
Osmia uncinata Gerstäcker, 1869	Germany	Nordrhein-Westfalen	Hagen-Ambrock	51.3223	7.51749		2001-05-02	0	1
Osmia uncinata Gerstäcker, 1869	Germany	Nordrhein-Westfalen	Hundeübungsplatz	51.8727	8.45294		2001-05-12	0	1	Bleidorn, Christoph und Venne, Christian	Bleidorn, Christoph und Venne, Christian	Esser, Jürgen AK Nordrhein-Westfalen (personal communication)
Osmia uncinata Gerstäcker, 1869	Germany	Nordrhein-Westfalen	Köln K. F. (= Königsforst, ein Binnendünengebiet auf der rechten Mittelterrasse.) (Aerts 1960)	50.9282	7.12006		00.00.1958	0	0	Aerts, Wilhelm (1885-1964)		Aerts, W. (1960): Die Bienenfauna des Rheinlandes. Decheniana 112: 181-208.
Osmia uncinata Gerstäcker, 1869	Germany	Nordrhein-Westfalen	Köln-Dellbrück	50.9719	7.04711		1988-05-06	0	1	Risch, Stephan	Risch, Stephan	Esser, Jürgen AK Nordrhein-Westfalen (personal communication)
Osmia uncinata Gerstäcker, 1869	Germany	Nordrhein-Westfalen	Mehrhoog- Heidegebiete	51.7374	6.50446		1997-05-30	0	1		Zoologisches Institut der Universität zu Köln	Teil-Sammlungsaufnahme durch J. Esser und A. Jakubzik 2002 - Niederhein-Daten
Osmia uncinata Gerstäcker, 1869	Germany	Nordrhein-Westfalen	Münster-Hiltrup Hiltruper See	51.887	7.66049		00.00.1996	0	0			Tumbrinck, K. (1996): Vergleichende Untersuchungen von Wildbienen-Populationen auf naturnahen Sandflächen in innerstädtischen Parkanlagen. - Unveröffentlichte Diplomarbeit Universität Münster. Münster.
Osmia uncinata Gerstäcker, 1869	Germany	Nordrhein-Westfalen	Nationalpark Eifel: ehemalige Kiesgrube an der B265	50.6146	6.54083		2011-04-11	0	1	Esser, Jürgen	Esser, Jürgen	Esser, Jürgen AK Nordrhein-Westfalen (personal communication)		Esser, Jürgen
Osmia uncinata Gerstäcker, 1869	Germany	Nordrhein-Westfalen	Netphen Hainchen-Geiersgrund	50.8591	8.22123		2001-07-03	0	1	Fuhrmann, Markus	Fuhrmann, Markus	Esser, Jürgen AK Nordrhein-Westfalen (personal communication)
Osmia uncinata Gerstäcker, 1869	Germany	Nordrhein-Westfalen	Neunkirchen-Mahlscheid	50.771	7.97884		2000-05-06	0	1	Fuhrmann, Markus	Fuhrmann, Markus	Esser, Jürgen AK Nordrhein-Westfalen (personal communication)
Osmia uncinata Gerstäcker, 1869	Germany	Nordrhein-Westfalen	NSG Augustdorfer Dünenfeld - Mäusegrund	51.9113	8.70647		2005-05-26	0	1	Bleidorn, Christoph und Venne, Christian	Bleidorn, Christoph und Venne, Christian	Esser, Jürgen AK Nordrhein-Westfalen (personal communication)
Osmia uncinata Gerstäcker, 1869	Germany	Nordrhein-Westfalen	NSG Schluchten und Moore am oberen Furlbach	51.8929	8.71238		2005-05-25	0	1	Bleidorn, Christoph und Venne, Christian	Esser, Jürgen	Esser, Jürgen AK Nordrhein-Westfalen (personal communication)
Osmia uncinata Gerstäcker, 1869	Germany	Nordrhein-Westfalen	Ramsbruch (4016-SO)	51.9277	8.45358		2008-05-05	1	0		Bleidorn, Christoph und Venne, Christian	Esser, Jürgen AK Nordrhein-Westfalen (personal communication)
Osmia uncinata Gerstäcker, 1869	Germany	Nordrhein-Westfalen	Wachtberg (NSG Rodderberg)	50.6412	7.19455		00.00.2006	0	0	Schindler, M.		Schindler, M. und V. Mauss (2009): Bienen und Wespen (Hymenoptera, Aculeata) des NSG Rodderberg bei Bonn. Decheniana, 162: 181-187.
Osmia uncinata Gerstäcker, 1869	Germany	Nordrhein-Westfalen	Wesel-Flüren MTB 4305/1 (Biotop DW)	51.6719	6.5468		00.00.2002	1	0	Freundt, Renate	Freundt, Renate	Esser, Jürgen AK Nordrhein-Westfalen (personal communication)
Osmia uncinata Gerstäcker, 1869	Germany	Rheinland-Pfalz	5213-NO	50.7728	7.95173		2000-05-06	0	0
Osmia uncinata Gerstäcker, 1869	Germany	Rheinland-Pfalz	Bellheim, Sandgrube in der Spreng	49.2023	8.27892		1995-05-05	0	1		Kitt, M.	Burger, Roland (AK Rheinland-Pfalz) (personal communication)		Kitt, M.
Osmia uncinata Gerstäcker, 1869	Germany	Rheinland-Pfalz	Contwig, NSG Wahlbacher Heide	49.2241	7.44306		2012-05-27	0	1	Burger, Ronald	Burger, Ronald	Burger, Roland (AK Rheinland-Pfalz) (personal communication)		Burger, Ronald
Osmia uncinata Gerstäcker, 1869	Germany	Rheinland-Pfalz	Germersheim, Südwestlicher Ortsrand,Sand	49.2126	8.34639		00.00.2008	0	1		Kitt, M.	Burger, Roland (AK Rheinland-Pfalz) (personal communication)		Kitt, M.
Osmia uncinata Gerstäcker, 1869	Germany	Rheinland-Pfalz	Germersheim, US-Depot	49.2255	8.34844		2008-05-08	0	1		Kitt, M.	Burger, Roland (AK Rheinland-Pfalz) (personal communication)		Kitt, M.
Osmia uncinata Gerstäcker, 1869	Germany	Rheinland-Pfalz	Gerolstein - Judenkirchhof	50.2229	6.64409		2003-05-05	0	1	Burger, Ronald		Burger, Roland (AK Rheinland-Pfalz) (personal communication)		Cölln, K.
Osmia uncinata Gerstäcker, 1869	Germany	Rheinland-Pfalz	Gönnersdorf	50.4811	7.26229		00.00.1993	0	0	Burger, Ronald		Burger, Roland (AK Rheinland-Pfalz) (personal communication)		Cölln, K.
Osmia uncinata Gerstäcker, 1869	Germany	Rheinland-Pfalz	Gönnersdorf, NSG Mäuerchenberg	50.3338	6.6128		1992-07-10	0	1		Hemb	Burger, Roland (AK Rheinland-Pfalz) (personal communication)		Hemb
Osmia uncinata Gerstäcker, 1869	Germany	Rheinland-Pfalz	Haßloch, Kiefernwald 200m südl der Sägemühle	49.3443	8.25405		2015-05-09	0	1	Burger, Ronald	Burger, Ronald	Burger, Roland (AK Rheinland-Pfalz) (personal communication)		Burger, Ronald
Osmia uncinata Gerstäcker, 1869	Germany	Rheinland-Pfalz	Haßloch, Nike-station	49.3243	8.26931		2008-05-03	1	0		Kitt, M.	Burger, Roland (AK Rheinland-Pfalz) (personal communication)		Kitt, M.
Osmia uncinata Gerstäcker, 1869	Germany	Rheinland-Pfalz	Heidesheim am Rhein, Lennebergwald; 8km w Mainz, 3 km no Heidesheim	50.0119	8.16709		1992-05-20	0	2		Schmid-Egger, Christian	Burger, Roland (AK Rheinland-Pfalz) (personal communication)		Schmid-Egger, Christian
Osmia uncinata Gerstäcker, 1869	Germany	Rheinland-Pfalz	Heidesheim am Rhein, Lennebergwald; 8km w Mainz, 3 km no Heidesheim	50.0119	8.16709		1992-05-25	1	0		Schmid-Egger, Christian	Burger, Roland (AK Rheinland-Pfalz) (personal communication)		Schmid-Egger, Christian
Osmia uncinata Gerstäcker, 1869	Germany	Rheinland-Pfalz	Kaltbachthal	50.3214	7.80191		00.07.1876	0	0	Buddeberg		Buddeberg, Karl Dietrich (1895): Die bei Nassau beobachteten Bienen – Jahrbücher des Nassauischen Vereins für Naturkunde – 48: 99 - 125.
Osmia uncinata Gerstäcker, 1869	Germany	Rheinland-Pfalz	Langmühle, Buchbachtal	49.163	7.70104		00.06.1986	0	0		Schmid-Egger, Christian	Burger, Roland (AK Rheinland-Pfalz) (personal communication)		sce
Osmia uncinata Gerstäcker, 1869	Germany	Rheinland-Pfalz	Monsheim, Monsheim, extensive Kaolingrube	49.6412	8.21064		2001-04-30	0	1		Reder, Gerd	Burger, Roland (AK Rheinland-Pfalz) (personal communication)		Reder, Gerd
Osmia uncinata Gerstäcker, 1869	Germany	Rheinland-Pfalz	Neustadt an der Weinstraße	49.3519	8.1528		00.00.1947	1	4		FAKB	Burger, Roland (AK Rheinland-Pfalz) (personal communication)		Roeseler
Osmia uncinata Gerstäcker, 1869	Germany	Rheinland-Pfalz	Schweighofen, Sandbuckel	49.0282	8.0155		1983-04-16	1	0		Brechtel, F.	Burger, Roland (AK Rheinland-Pfalz) (personal communication)		Brechtel, F.
Osmia uncinata Gerstäcker, 1869	Germany	Rheinland-Pfalz	Schweighofen, Sandbuckel	49.0282	8.0155		1983-04-29	1	0		Brechtel, F.	Burger, Roland (AK Rheinland-Pfalz) (personal communication)		Brechtel, F.
Osmia uncinata Gerstäcker, 1869	Germany	Rheinland-Pfalz	Schweighofen, Sandbuckel	49.0282	8.0155		1983-05-13	0	1		Brechtel, F.	Burger, Roland (AK Rheinland-Pfalz) (personal communication)		Brechtel, F.
Osmia uncinata Gerstäcker, 1869	Germany	Rheinland-Pfalz	Speyer, Sand	49.304	8.36138		1989-05-25	0	1		Treiber, Reinhold	Burger, Roland (AK Rheinland-Pfalz) (personal communication)		Treiber, Reinhold
Osmia uncinata Gerstäcker, 1869	Germany	Rheinland-Pfalz	Stadtkyll, Wirftal	50.34	6.53642		1992-07-20	0	1		Hemb	Burger, Roland (AK Rheinland-Pfalz) (personal communication)		Hemb
Osmia uncinata Gerstäcker, 1869	Germany	Rheinland-Pfalz	Südwestlich Weilerbach	49.4695	7.62192		00.00.2011	0	1		Kitt, M.	Burger, Roland (AK Rheinland-Pfalz) (personal communication)		Kitt, M.
Osmia uncinata Gerstäcker, 1869	Germany	Rheinland-Pfalz		49.2246	7.44347		2012-05-27	0	0		Artenfinder Rheinland-Pfalz	Global Biodiversity Information Facility
Osmia uncinata Gerstäcker, 1869	Germany	Sachsen	Biosph.reservat Oberl. Nähe Elchgehege bei Dauban ca. 1,0 km Umkreis	51.2819	14.6176	161	2014-06-06	0	1	Stellmacher, Andreas	Stellmacher, Andreas (Görlitz)	Stellmacher, Andreas (personal communication)		Stellmacher, Andreas (Görlitz)
Osmia uncinata Gerstäcker, 1869	Germany	Sachsen	Dresden-Botanischer Garten	51.0436	13.7585		2003-05-22	0	1
Osmia uncinata Gerstäcker, 1869	Germany	Sachsen	Ehrenfriedersdorf	50.6493	12.9701		1919-05-23	1	0	Muller, H	SEMC	Global Biodiversity Information Facility		Zanden
Osmia uncinata Gerstäcker, 1869	Germany	Sachsen	Jänkendorf OT Schäferei (bei Niesky) ca. 0,8-1,5 km N/NW v. OTmitte	51.2765	14.8125	154	2009-05-01	0	1	Stellmacher, Andreas	Stellmacher, Andreas (Görlitz)	Stellmacher, Andreas (personal communication)		Stellmacher, Andreas (Görlitz)
Osmia uncinata Gerstäcker, 1869	Germany	Sachsen	Jänkendorf OT Schäferei (bei Niesky) ca. 0,8-1,5 km N/NW v. OTmitte	51.2765	14.8125	154	2010-04-29	0	1	Stellmacher, Andreas	Stellmacher, Andreas (Görlitz)	Stellmacher, Andreas (personal communication)		Stellmacher, Andreas (Görlitz)
Osmia uncinata Gerstäcker, 1869	Germany	Sachsen	Jänkendorf OT Schäferei (bei Niesky) ca. 0,8-1,5 km N/NW v. OTmitte	51.2765	14.8125	154	2010-05-29	0	1	Stellmacher, Andreas	Stellmacher, Andreas (Görlitz)	Stellmacher, Andreas (personal communication)		Stellmacher, Andreas (Görlitz)
Osmia uncinata Gerstäcker, 1869	Germany	Sachsen	Jänkendorf OT Schäferei (bei Niesky) ca. 0,8-1,5 km N/NW v. OTmitte	51.2765	14.8125	154	2011-04-30	0	1	Stellmacher, Andreas	Stellmacher, Andreas (Görlitz)	Stellmacher, Andreas (personal communication)		Stellmacher, Andreas (Görlitz)
Osmia uncinata Gerstäcker, 1869	Germany	Sachsen	Jänkendorf OT Schäferei (bei Niesky) ca. 0,8-1,5 km N/NW v. OTmitte	51.2765	14.8125	154	2012-05-19	0	1	Stellmacher, Andreas	Stellmacher, Andreas (Görlitz)	Stellmacher, Andreas (personal communication)		Stellmacher, Andreas (Görlitz)
Osmia uncinata Gerstäcker, 1869	Germany	Sachsen	Jänkendorf OT Schäferei (bei Niesky) ca. 0,8-1,5 km N/NW v. OTmitte	51.2765	14.8125	154	2013-05-15	0	1	Stellmacher, Andreas	Stellmacher, Andreas (Görlitz)	Stellmacher, Andreas (personal communication)		Stellmacher, Andreas (Görlitz)
Osmia uncinata Gerstäcker, 1869	Germany	Sachsen	Jänkendorf OT Schäferei (bei Niesky) ca. 0,8-1,5 km N/NW v. OTmitte	51.2765	14.8125	154	2013-06-16	0	1	Stellmacher, Andreas	Stellmacher, Andreas (Görlitz)	Stellmacher, Andreas (personal communication)		Stellmacher, Andreas (Görlitz)
Osmia uncinata Gerstäcker, 1869	Germany	Sachsen	Jänkendorf OT Schäferei (bei Niesky) ca. 0,8-1,5 km N/NW v. OTmitte	51.2765	14.8125	154	2014-04-23	1	0	Stellmacher, Andreas	Stellmacher, Andreas (Görlitz)	Stellmacher, Andreas (personal communication)		Stellmacher, Andreas (Görlitz)
Osmia uncinata Gerstäcker, 1869	Germany	Sachsen	Jänkendorf OT Schäferei (bei Niesky) ca. 0,8-1,5 km N/NW v. OTmitte	51.2765	14.8125	154	2016-05-07	0	1	Stellmacher, Andreas	Stellmacher, Andreas (Görlitz)	Stellmacher, Andreas (personal communication)		Stellmacher, Andreas (Görlitz)
Osmia uncinata Gerstäcker, 1869	Germany	Sachsen	Jänkendorf OT Schäferei (bei Niesky) ca. 0,8-1,5 km N/NW v. OTmitte	51.2765	14.8125	154	2017-05-18	0	1	Stellmacher, Andreas	Stellmacher, Andreas (Görlitz)	Stellmacher, Andreas (personal communication)		Stellmacher, Andreas (Görlitz)
Osmia uncinata Gerstäcker, 1869	Germany	Sachsen	Jänkendorf OT Schäferei (bei Niesky) ca. 0,8-1,5 km N/NW v. OTmitte	51.2765	14.8125	154	2019-05-30	0	1	Stellmacher, Andreas	Stellmacher, Andreas (Görlitz)	Stellmacher, Andreas (personal communication)		Stellmacher, Andreas (Görlitz)
Osmia uncinata Gerstäcker, 1869	Germany	Sachsen	NSG Stausee Quitzdorf ca. 0,2/0,6 km NO Campingplatz Wacheberg	51.268	14.7945	162	2011-04-03	1	0	Stellmacher, Andreas	Stellmacher, Andreas (Görlitz)	Stellmacher, Andreas (personal communication)		Stellmacher, Andreas (Görlitz)
Osmia uncinata Gerstäcker, 1869	Germany	Sachsen	NSG Stausee Quitzdorf ca. 0,2/0,6 km NO Campingplatz Wacheberg	51.268	14.7945	162	2015-05-22	0	1	Stellmacher, Andreas	Stellmacher, Andreas (Görlitz)	Stellmacher, Andreas (personal communication)		Stellmacher, Andreas (Görlitz)
Osmia uncinata Gerstäcker, 1869	Germany	Sachsen	NSG Stausee Quitzdorf ca. 0,2/0,6 km NO Campingplatz Wacheberg	51.268	14.7945	162	2016-05-10	0	1	Stellmacher, Andreas	Stellmacher, Andreas (Görlitz)	Stellmacher, Andreas (personal communication)		Stellmacher, Andreas (Görlitz)
Osmia uncinata Gerstäcker, 1869	Germany	Sachsen	NSG Stausee Quitzdorf ca. 0,2/0,6 km NO Campingplatz Wacheberg	51.268	14.7945	162	2018-05-04	0	1	Stellmacher, Andreas	Stellmacher, Andreas (Görlitz)	Stellmacher, Andreas (personal communication)		Stellmacher, Andreas (Görlitz)
Osmia uncinata Gerstäcker, 1869	Germany	Sachsen	Rothenburg/OL Friedenstr. ca. 250 m NO Flugplatz	51.3704	14.9609	159	2014-04-20	1	0	Stellmacher, Andreas	Stellmacher, Andreas (Görlitz)	Stellmacher, Andreas (personal communication)		Stellmacher, Andreas (Görlitz)
Osmia uncinata Gerstäcker, 1869	Germany	Sachsen	Straupitz, Neuzaucher Weinberg	51.9129	14.0998		2010-04-26	1	0	Liebig, Wolf-Harald	Liebig, Wolf-Harald	Liebig, Wolf-Harald (personal communication)		Liebig, Wolf-Harald
Osmia uncinata Gerstäcker, 1869	Germany	Sachsen	Straupitz, Neuzaucher Weinberg	51.9129	14.0998		2010-05-07	1	0	Liebig, Wolf-Harald	Liebig, Wolf-Harald	Liebig, Wolf-Harald (personal communication)		Liebig, Wolf-Harald
Osmia uncinata Gerstäcker, 1869	Germany	Sachsen	Tiergarten bei Weißwasser, Weißwasser, NSG Urwald, Weißwasserwiese	51.4981	14.5639		2009-08-07	0	1	Liebig, Wolf-Harald	Liebig, Wolf-Harald	Liebig, Wolf-Harald (personal communication)		Liebig, Wolf-Harald
Osmia uncinata Gerstäcker, 1869	Germany	Sachsen	Tiergarten bei Weißwasser, Weißwasser, NSG Urwald, Weißwasserwiese	51.4981	14.5639		2010-07-05	1	0	Liebig, Wolf-Harald	Liebig, Wolf-Harald	Liebig, Wolf-Harald (personal communication)		Liebig, Wolf-Harald
Osmia uncinata Gerstäcker, 1869	Germany	Sachsen	Weißwasser NSG Trebendorf Waldweg	51.5138	14.5827		1993-05-30	2	0	Liebig, Wolf-Harald	Liebig, Wolf-Harald	Liebig, Wolf-Harald (personal communication)		Liebig, Wolf-Harald
Osmia uncinata Gerstäcker, 1869	Germany	Sachsen	Zeithain Gohrischheide	51.3556	13.2828		1999-06-05	0	1	Liebig, Wolf-Harald	Liebig, Wolf-Harald	Liebig, Wolf-Harald (personal communication)		Liebig, Wolf-Harald
Osmia uncinata Gerstäcker, 1869	Germany	Sachsen	Zwochau O Röcknitz	51.4455	12.8095		2019-04-30	2	0	Kwast, Tom	Liebig, Wolf-Harald	Liebig, Wolf-Harald (personal communication)		Liebig, Wolf-Harald
Osmia uncinata Gerstäcker, 1869	Germany	Sachsen-Anhalt	Himmelreich	51.1106	11.7072		1922-06-07	0	1	Alfken, J. D.		Blüthgen, Paul August Viktor (1924): Beiträge zur Kenntnis der Hymenopterenfauna des Saaletals. – Entomologische Zeitung Stettin – 85: 137 - 172.
Osmia uncinata Gerstäcker, 1869	Germany	Sachsen-Anhalt	Saalethal	51.1106	11.7072		1924-05-14	0	1			Blüthgen, Paul August Viktor (1924): Beiträge zur Kenntnis der Hymenopterenfauna des Saaletals. – Entomologische Zeitung Stettin – 85: 137 - 172.
Osmia uncinata Gerstäcker, 1869	Germany	Schleswig-Holstein	Büchen-BGS Übungsgelände	53.4948	10.5974		16.04.1994-30.07.2004	0	0	van der Smissen, Jane	van der Smissen, Jane	van der Smissen, Jane (personal communication)		van der Smissen, Jane
Osmia uncinata Gerstäcker, 1869	Germany	Schleswig-Holstein	Bröthen-Grenzstreifen ca. 2 km südöstlich Bröthen	53.4681	10.6944		23.05.1992-06.09.2003	0	0	van der Smissen, Jane	van der Smissen, Jane	van der Smissen, Jane (personal communication)		van der Smissen, Jane
Osmia uncinata Gerstäcker, 1869	Germany	Schleswig-Holstein	Fitzen-Breite Sandfeldwege 1 km nordöstlich Fitzen	53.5026	10.6604		18.06.1997-07.08.2004	0	0	van der Smissen, Jane	van der Smissen, Jane	van der Smissen, Jane (personal communication)		van der Smissen, Jane
Osmia uncinata Gerstäcker, 1869	Germany	Schleswig-Holstein	Lübeck-St. Gertrud-Stadtwald Lauerholz, Kahlschlag	53.8848	10.7388		03.08.1997-05.05.1999	0	0	van der Smissen, Jane	van der Smissen, Jane	van der Smissen, Jane (personal communication)		van der Smissen, Jane
Osmia uncinata Gerstäcker, 1869	Germany	Schleswig-Holstein	NSG_030-Barker Heide	53.9129	10.1493		06.05.1999-25.04.2000	0	0	van der Smissen, Jane	van der Smissen, Jane	van der Smissen, Jane (personal communication)		van der Smissen, Jane
Osmia uncinata Gerstäcker, 1869	Germany	Schleswig-Holstein	Schleswig-Holstein/Büchen, Übungsplatz BGS	53.4791	10.6231		1997-05-02	1	0	van der Smissen, Jane	Prosi, Rainer	van der Smissen, Jane (personal communication)		van der Smissen, Jane
Osmia uncinata Gerstäcker, 1869	Germany	Schleswig-Holstein	Sterley-Sterleyer Heide 2 km nordöstlich Sterley	53.6355	10.8327		31.07.1999-08.08.2004	0	0	van der Smissen, Jane	van der Smissen, Jane	van der Smissen, Jane (personal communication)		van der Smissen, Jane
Osmia uncinata Gerstäcker, 1869	Germany	Thüringen	Badra, Solberg	51.4197	10.9754		2006-06-22	0	0	Weipert, J.	Naturkundemuseum Erfurt
Osmia uncinata Gerstäcker, 1869	Germany	Thüringen	Crawinkel	50.7923	10.7809		2007-06-12	0	0		Artenvielfalt auf der Weide - GEO-Hauptveranstaltu	Global Biodiversity Information Facility
Osmia uncinata Gerstäcker, 1869	Germany	Thüringen	Gompertshausen	50.2987	10.6251		1990-05-29	0	0	Mandery, Klaus	Mandery, Klaus	Mandery, Klaus (personal communication)		Mandery, Klaus
Osmia uncinata Gerstäcker, 1869	Germany	Thüringen	Gompertshausen	50.2987	10.6251		1993-04-30	0	0	Mandery, Klaus	Mandery, Klaus	Mandery, Klaus (personal communication)		Mandery, Klaus
Osmia uncinata Gerstäcker, 1869	Germany	Thüringen	HBN: Gompertshausen	50.2998	10.6251		1990-05-29	0	1	Mandery, Klaus		Mandery, Klaus (1999): Stechimmen (Hymenoptera: Aculeata) im Heldburger Unterland (Lkr. Hildburghausen) und im Orphaler Grund (Stadt Erfurt). – Thüringer Faunistische Abhandlungen – 6: 211 - 223.
Osmia uncinata Gerstäcker, 1869	Germany	Thüringen	HBN: Gompertshausen	50.2998	10.6251		1993-04-30	0	1	Mandery, Klaus		Mandery, Klaus (1999): Stechimmen (Hymenoptera: Aculeata) im Heldburger Unterland (Lkr. Hildburghausen) und im Orphaler Grund (Stadt Erfurt). – Thüringer Faunistische Abhandlungen – 6: 211 - 223.
Osmia uncinata Gerstäcker, 1869	Germany	Thüringen	Oberthalhsn.	51.05	10.3167		2004-06-19	0	1	Flügel, Hans Joachim	Flügel, Hans Joachim	Flügel, Hans Joachim (personal communication)		Flügel, Hans Joachim
Osmia uncinata Gerstäcker, 1869	Germany	Thüringen	Roßdorf, Roßdorfer Kutte	50.7001	10.201		2004-07-22	0	0	Reum, D.	Reum, D.
Osmia uncinata Gerstäcker, 1869	Germany	Thüringen	Rothensteiner Felsen bei Jena,	50.85	11.6146		00.00.1924	0	0			Blüthgen, Paul August Viktor (1924): Beiträge zur Kenntnis der Hymenopterenfauna des Saaletals. – Entomologische Zeitung Stettin – 85: 137 - 172.
Osmia uncinata Gerstäcker, 1869	Germany	Thüringen	Seega-Hainleite,Pfarrkopf	51.3189	11.049		2011-05-09	0	1	Burger, Frank	Burger, Frank	Burger, Frank (personal communication)
Osmia uncinata Gerstäcker, 1869	Germany	Thüringen	Steinthaleben,Bettentäler	51.3943	11.0452		1998-06-21	0	1	Burger, Frank	Burger, Frank	Burger, Frank (personal communication)
Osmia uncinata Gerstäcker, 1869	Germany	Thüringen	Weimar, Schöndorf	51.0153	11.3325		2004-04-24	0	0	Burger, Frank	Burger, Frank	Burger, Frank (personal communication)
Osmia uncinata Gerstäcker, 1869	Great Britain	Scotland	Abernethy Forest	57.1924	-3.6208		2014-06-17	0	1	Strudwick, Tim	CI0001660000001O	HBRG		Strudwick, Tim
Osmia uncinata Gerstäcker, 1869	Great Britain	Scotland	Abernethy Forest	57.2202	-3.68992		2014-06-18	0	1	Strudwick, Tim	CI0001660000001O	HBRG		Strudwick, Tim
Osmia uncinata Gerstäcker, 1869	Great Britain	Scotland	Abernethy Forest	57.2483	-3.66966		2014-06-16	0	1	Strudwick, Tim	CI0001660000001O	HBRG		Strudwick, Tim
Osmia uncinata Gerstäcker, 1869	Great Britain	Scotland	Abernethy Forest	57.2538	-3.66328		2014-06-16	0	1	Strudwick, Tim	CI0001660000001O	HBRG		Strudwick, Tim
Osmia uncinata Gerstäcker, 1869	Great Britain	Scotland	Abernethy Forest	57.2538	-3.66328		2014-06-18	0	1	Strudwick, Tim	CI0001660000001O	HBRG		Strudwick, Tim
Osmia uncinata Gerstäcker, 1869	Great Britain	Scotland	Abernethy Forest	57.2544	-3.68983		2014-06-16	0	1	Strudwick, Tim	CI0001660000001O	HBRG		Strudwick, Tim
Osmia uncinata Gerstäcker, 1869	Great Britain	Scotland	Abernethy Forest	57.2544	-3.68651		2014-06-16	0	1	Strudwick, Tim	CI0001660000001O	HBRG		Strudwick, Tim
Osmia uncinata Gerstäcker, 1869	Great Britain	Scotland	Abernethy Forest	57.2544	-3.68651		2014-06-18	0	1	Strudwick, Tim	CI0001660000001O	HBRG		Strudwick, Tim
Osmia uncinata Gerstäcker, 1869	Great Britain	Scotland	Abernethy Forest	57.2552	-3.69153		2014-06-16	0	2	Strudwick, Tim	CI0001660000001O	HBRG		Strudwick, Tim
Osmia uncinata Gerstäcker, 1869	Great Britain	Scotland	Abernethy Forest	57.2552	-3.69153		2014-06-18	0	2	Strudwick, Tim	CI0001660000001O	HBRG		Strudwick, Tim
Osmia uncinata Gerstäcker, 1869	Great Britain	Scotland	Abernethy Forest	57.257	-3.69161		2014-06-16	0	2	Strudwick, Tim	CI0001660000001O	HBRG		Strudwick, Tim
Osmia uncinata Gerstäcker, 1869	Great Britain	Scotland	Abernethy Forest	57.257	-3.69161		2014-06-18	0	1	Strudwick, Tim	CI0001660000001O	HBRG		Strudwick, Tim
Osmia uncinata Gerstäcker, 1869	Great Britain	Scotland	Abernethy Forest	57.2597	-3.69173		2014-06-16	0	1	Strudwick, Tim	CI0001660000001O	HBRG		Strudwick, Tim
Osmia uncinata Gerstäcker, 1869	Great Britain	Scotland	Abernethy Forest RSPB	57.2548	-3.69176		2017-05-26	0	1	Taylor, Stewart	CI0001660000001O	HBRG		Taylor, Stewart
Osmia uncinata Gerstäcker, 1869	Great Britain	Scotland	Abernethy Forest RSPB	57.26	-3.69014		2013-06-09	0	1	Taylor, Stewart	CI0001660000001O	HBRG		Taylor, Stewart
Osmia uncinata Gerstäcker, 1869	Great Britain	Scotland	Abernethy Forest SSSI	57.2543	-3.69148		2013-06-19	0	0	Cathrine, Chris / Norris, Glenn	1	Global Biodiversity Information Facility		Cathrine, Chris / Norris, Glenn
Osmia uncinata Gerstäcker, 1869	Great Britain	Scotland	Altnabreac	57.5744	-4.63299		2017-06-03	0	2	Macdonald, Murdo	CI0001660000001O	HBRG		Macdonald, Murdo
Osmia uncinata Gerstäcker, 1869	Great Britain	Scotland	Altnabreac	57.5753	-4.63558		2017-06-03	0	1	Macdonald, Murdo	CI0001660000001O	HBRG		Macdonald, Murdo
Osmia uncinata Gerstäcker, 1869	Great Britain	Scotland	An Camas Mor	57.1819	-3.80375		2015-06-10	0	1	Macdonald, Murdo	CI0001660000001O	HBRG		Macdonald, Murdo
Osmia uncinata Gerstäcker, 1869	Great Britain	Scotland	Blackmuir Wood	57.5777	-4.53037		2017-05-26	0	1	Macdonald, Murdo	CI0001660000001O	HBRG		Macdonald, Murdo
Osmia uncinata Gerstäcker, 1869	Great Britain	Scotland	Boblainy Forest	57.4134	-4.5126		2014-06-02	0	3	Macdonald, Murdo	CI0001660000001O	HBRG		Macdonald, Murdo
Osmia uncinata Gerstäcker, 1869	Great Britain	Scotland	Cairngorm	57.1342	-3.67113		00.00.1980	0	0	Unknown-to-HBRG	CI0001660000001O	HBRG		Unknown-to-HBRG
Osmia uncinata Gerstäcker, 1869	Great Britain	Scotland	Cambusmore	57.1939	-3.80374		2015-07-24	0	0	Taylor, Stewart	CI0001660000001O	HBRG		Taylor, Stewart
Osmia uncinata Gerstäcker, 1869	Great Britain	Scotland	Dalfaber	57.1983	-3.82248		2016-08-15	0	1	Macdonald, Murdo	Highland Biological Recording Group (HBRG)	HBRG		Macdonald, Murdo
Osmia uncinata Gerstäcker, 1869	Great Britain	Scotland	Linn of Quoich	57.0012	-3.45607		2010-06-21	0	0	Taylor, Stewart	CI00023300000022	NTS		Taylor, Stewart
Osmia uncinata Gerstäcker, 1869	Great Britain	Scotland	Mar Lodge (MAR), Allanaquoich	57.0061	-3.45873		2001-06-01	0	0	Edwards, Mike	CI00023300000046	NTS		Edwards, Mike
Osmia uncinata Gerstäcker, 1869	Great Britain	Scotland	Monadh Mor	57.5494	-4.36612		2014-06-06	0	0	Macdonald, Murdo	CI0001660000001O	HBRG		Macdonald, Murdo
Osmia uncinata Gerstäcker, 1869	Great Britain	Scotland	Mullin's Wood	57.5454	-4.36168		2004-06-02	0	2	Macdonald, Murdo	CI0001660000001O	HBRG		Macdonald, Murdo
Osmia uncinata Gerstäcker, 1869	Great Britain	Scotland	School Wood	57.2685	-3.63741		2013-06-11	0	0	Falk, Steven	CI0001660000001O	HBRG		Falk, Steven
Osmia uncinata Gerstäcker, 1869	Great Britain	Scotland	Spinningdale, Rivra	57.8854	-4.24393		2008-05-06	0	1	Entwistle, Philip	Highland Biological Recording Group	Global Biodiversity Information Facility		Entwistle, Philip
Osmia uncinata Gerstäcker, 1869	Great Britain	Scotland	Spinningdale, Rivra	57.8854	-4.24393		2008-06-04	0	0	Entwistle, Philip	Highland Biological Recording Group	Global Biodiversity Information Facility		Entwistle, Philip
Osmia uncinata Gerstäcker, 1869	Great Britain	Scotland	Spinningdale, Rivra	57.8854	-4.24393		2009-05-07	0	1	Entwistle, Philip	CI00016600000034	HBRG		Entwistle, Philip
Osmia uncinata Gerstäcker, 1869	Great Britain		Abernethy Forest	57.2546	-3.68675		2011-06-03	0	3	Stewart, Taylor	Highland Biological Recording Group	Global Biodiversity Information Facility		Stewart Taylor
Osmia uncinata Gerstäcker, 1869	Great Britain		Abernethy Forest	57.2564	-3.68849		2008-06-07	0	0	Stewart, Taylor	Highland Biological Recording Group	Global Biodiversity Information Facility		Murdo Macdonald
Osmia uncinata Gerstäcker, 1869	Great Britain		Abernethy Forest	57.2572	-3.69019		2011-06-02	0	3	Stewart, Taylor	Highland Biological Recording Group	Global Biodiversity Information Facility		Stewart Taylor
Osmia uncinata Gerstäcker, 1869	Great Britain		Bognacruie	57.2064	-3.59183		2006-06-09	0	1	Stewart, Taylor	Highland Biological Recording Group	Global Biodiversity Information Facility		Stewart Taylor
Osmia uncinata Gerstäcker, 1869	Great Britain		Cairngorm	57.1344	-3.66972		1984-01-01	0	0	Unknown-to-HBRG	Highland Biological Recording Group	Global Biodiversity Information Facility		Unknown-to-HBRG
Osmia uncinata Gerstäcker, 1869	Great Britain		Craigvarren	57.392	-3.47506		2005-07-07	0	0	Nisbet, Gill	Highland Biological Recording Group	Global Biodiversity Information Facility		Gill Nisbet
Osmia uncinata Gerstäcker, 1869	Great Britain		Culbin Forest	57.633	-3.68081		2005-07-08	0	1	Nisbet, Gill	Highland Biological Recording Group	Global Biodiversity Information Facility		Murdo Macdonald
Osmia uncinata Gerstäcker, 1869	Great Britain		Fyrish path	57.7084	-4.31216		2005-06-07	0	1	Macdonald, Murdo	Highland Biological Recording Group	Global Biodiversity Information Facility		Murdo Macdonald
Osmia uncinata Gerstäcker, 1869	Great Britain		Linn of Quoich	56.9975	-3.44049		2001-06-12	0	1	Davidson, A.;Edwards, Mike	National Trust for Scotland	Global Biodiversity Information Facility
Osmia uncinata Gerstäcker, 1869	Great Britain		Lower Quoich (pine wood)	57.0119	-3.47645		2001-06-13	0	0	Davidson, A.;Edwards, Mike	National Trust for Scotland	Global Biodiversity Information Facility
Osmia uncinata Gerstäcker, 1869	Great Britain		Monadh Mor	57.5457	-4.36034		2005-05-31	0	2	Macdonald, Murdo	Highland Biological Recording Group	Global Biodiversity Information Facility		Murdo Macdonald
Osmia uncinata Gerstäcker, 1869	Great Britain		Monadh Mor	57.5467	-4.35372		2009-05-19	0	1	Macdonald, Murdo	Highland Biological Recording Group	Global Biodiversity Information Facility		Murdo Macdonald
Osmia uncinata Gerstäcker, 1869	Great Britain		Monadh Mor	57.5477	-4.35044		2007-05-31	0	1	Macdonald, Murdo	Highland Biological Recording Group	Global Biodiversity Information Facility		Murdo Macdonald
Osmia uncinata Gerstäcker, 1869	Great Britain		Monadh Mor	57.5495	-4.34889		2009-05-29	0	1	Macdonald, Murdo	Highland Biological Recording Group	Global Biodiversity Information Facility		Murdo Macdonald
Osmia uncinata Gerstäcker, 1869	Great Britain		Monadh Mor	57.55	-4.34808		2009-05-29	0	2	Macdonald, Murdo	Highland Biological Recording Group	Global Biodiversity Information Facility		Murdo Macdonald
Osmia uncinata Gerstäcker, 1869	Great Britain		Mondhuie	57.2554	-3.69011		2006-06-06	0	1	Stewart, Taylor	Highland Biological Recording Group	Global Biodiversity Information Facility		Stewart Taylor
Osmia uncinata Gerstäcker, 1869	Great Britain		Mullins Wood	57.5457	-4.36034		2004-06-03	0	0	Macdonald, Murdo	Highland Biological Recording Group	Global Biodiversity Information Facility		Murdo Macdonald
Osmia uncinata Gerstäcker, 1869	Great Britain		Nethy Bridge	57.2679	-3.62766		2001-05-26	0	1	Macdonald, Murdo	Highland Biological Recording Group	Global Biodiversity Information Facility		Murdo Macdonald
Osmia uncinata Gerstäcker, 1869	Great Britain		NH22-10km	57.2352	-4.98401		2001-06-18	0	0			Bees, Wasps and Ants Recording Society
Osmia uncinata Gerstäcker, 1869	Great Britain		NH55-10km	57.5153	-4.50585		2004-06-02	0	0			Bees, Wasps and Ants Recording Society
Osmia uncinata Gerstäcker, 1869	Great Britain		NH55-10km	57.5153	-4.50585		2005-05-31	0	0			Bees, Wasps and Ants Recording Society
Osmia uncinata Gerstäcker, 1869	Great Britain		NH55-10km	57.5153	-4.50585		2009-05-19	0	0			Bees, Wasps and Ants Recording Society
Osmia uncinata Gerstäcker, 1869	Great Britain		NH55-10km	57.5153	-4.50585		2009-05-29	0	0			Bees, Wasps and Ants Recording Society
Osmia uncinata Gerstäcker, 1869	Great Britain		NH587530-100m	57.545	-4.36249		2005-05-31	0	0			Highland Biological Recording Group
Osmia uncinata Gerstäcker, 1869	Great Britain		NH591531-100m	57.546	-4.35587		2009-05-19	0	0			Highland Biological Recording Group
Osmia uncinata Gerstäcker, 1869	Great Britain		NH593532-100m	57.547	-4.35259		2007-05-31	0	0			Highland Biological Recording Group
Osmia uncinata Gerstäcker, 1869	Great Britain		NH594534-100m	57.5488	-4.35104		2009-05-29	0	0			Highland Biological Recording Group
Osmia uncinata Gerstäcker, 1869	Great Britain		NH5953-1km	57.5451	-4.35748		2009-05-29	0	0			Highland Biological Recording Group
Osmia uncinata Gerstäcker, 1869	Great Britain		NH622710-100m	57.7076	-4.31433		2005-06-07	0	0			Highland Biological Recording Group
Osmia uncinata Gerstäcker, 1869	Great Britain		NH67-10km	57.6979	-4.35063		2005-06-07	0	0			Bees, Wasps and Ants Recording Society
Osmia uncinata Gerstäcker, 1869	Great Britain		NH69-10km	57.8774	-4.36233		2001-06-17	0	0			Bees, Wasps and Ants Recording Society
Osmia uncinata Gerstäcker, 1869	Great Britain		NH80-10km	57.0753	-3.98111		1982-06-02	0	0			Bees, Wasps and Ants Recording Society
Osmia uncinata Gerstäcker, 1869	Great Britain		NH80-10km	57.0753	-3.98111		1997-05-31	0	0			Bees, Wasps and Ants Recording Society
Osmia uncinata Gerstäcker, 1869	Great Britain		NH85-10km	57.5242	-4.0054		1988-05-14	0	0			Bees, Wasps and Ants Recording Society
Osmia uncinata Gerstäcker, 1869	Great Britain		NH90-10km	57.0778	-3.81625		1995-06-09	0	0			Bees, Wasps and Ants Recording Society
Osmia uncinata Gerstäcker, 1869	Great Britain		NH90-10km	57.0778	-3.81625		2001-06-10	0	0			Bees, Wasps and Ants Recording Society
Osmia uncinata Gerstäcker, 1869	Great Britain		NH91-10km	57.1676	-3.82066		1986-05-25	0	0			Bees, Wasps and Ants Recording Society
Osmia uncinata Gerstäcker, 1869	Great Britain		NH91-10km	57.1676	-3.82066		2001-06-09	0	0			Bees, Wasps and Ants Recording Society
Osmia uncinata Gerstäcker, 1869	Great Britain		NH91-10km	57.1676	-3.82066		2006-06-06	0	0			Bees, Wasps and Ants Recording Society
Osmia uncinata Gerstäcker, 1869	Great Britain		NH91-10km	57.1676	-3.82066		2008-06-06	0	0			Bees, Wasps and Ants Recording Society
Osmia uncinata Gerstäcker, 1869	Great Britain		NH93-10km	57.3472	-3.82954		1995-06-09	0	0			Bees, Wasps and Ants Recording Society
Osmia uncinata Gerstäcker, 1869	Great Britain		NH96-10km	57.6165	-3.84306		2005-07-08	0	0			Bees, Wasps and Ants Recording Society
Osmia uncinata Gerstäcker, 1869	Great Britain		NH967157-100m	57.2204	-3.71229		2010-05-31	0	0			Highland Biological Recording Group
Osmia uncinata Gerstäcker, 1869	Great Britain		NH980156-100m	57.2197	-3.69073		2014-06-18	0	0			Highland Biological Recording Group
Osmia uncinata Gerstäcker, 1869	Great Britain		NH980195-100m	57.2548	-3.69233		2006-06-06	0	0			Highland Biological Recording Group
Osmia uncinata Gerstäcker, 1869	Great Britain		NH980195-100m	57.2548	-3.69233		2011-06-02	0	0			Highland Biological Recording Group
Osmia uncinata Gerstäcker, 1869	Great Britain		NH980195-100m	57.2548	-3.69233		2011-06-03	0	0			Highland Biological Recording Group
Osmia uncinata Gerstäcker, 1869	Great Britain		NH980195-100m	57.2548	-3.69233		2014-06-18	0	0			Highland Biological Recording Group
Osmia uncinata Gerstäcker, 1869	Great Britain		NH980197-100m	57.2566	-3.69242		2011-06-02	0	0			Highland Biological Recording Group
Osmia uncinata Gerstäcker, 1869	Great Britain		NH980197-100m	57.2566	-3.69242		2011-06-03	0	0			Highland Biological Recording Group
Osmia uncinata Gerstäcker, 1869	Great Britain		NH980197-100m	57.2566	-3.69242		2014-06-18	0	0			Highland Biological Recording Group
Osmia uncinata Gerstäcker, 1869	Great Britain		NH9806-1km	57.1335	-3.6868		01.01.1980-31.12.1984	0	0			North East Scotland Biological Records Centre
Osmia uncinata Gerstäcker, 1869	Great Britain		NH981196-100m	57.2557	-3.69072		2008-06-06	0	0			Highland Biological Recording Group
Osmia uncinata Gerstäcker, 1869	Great Britain		NH9819-1km	57.2503	-3.69213		2006-06-06	0	0			North East Scotland Biological Records Centre
Osmia uncinata Gerstäcker, 1869	Great Britain		NH9819-1km	57.2503	-3.69213		2008-06-07	0	0			North East Scotland Biological Records Centre
Osmia uncinata Gerstäcker, 1869	Great Britain		NH982194-100m	57.2539	-3.68898		2011-06-03	0	0			Highland Biological Recording Group
Osmia uncinata Gerstäcker, 1869	Great Britain		NH982205-100m	57.2638	-3.68943		2011-06-02	0	0			Highland Biological Recording Group
Osmia uncinata Gerstäcker, 1869	Great Britain		NH983194-100m	57.2539	-3.68732		2014-06-18	0	0			Highland Biological Recording Group
Osmia uncinata Gerstäcker, 1869	Great Britain		NH989060-100m	57.1337	-3.67193		01.01.1980-31.12.1984	0	0			Highland Biological Recording Group
Osmia uncinata Gerstäcker, 1869	Great Britain		NH9961-1km	57.6276	-3.6929		2005-07-08	0	0			North East Scotland Biological Records Centre
Osmia uncinata Gerstäcker, 1869	Great Britain		NH996615-100m	57.6322	-3.68306		2005-07-08	0	0			Highland Biological Recording Group
Osmia uncinata Gerstäcker, 1869	Great Britain		NH997193-100m	57.2533	-3.66409		2014-06-18	0	0			Highland Biological Recording Group
Osmia uncinata Gerstäcker, 1869	Great Britain		NJ01-10km	57.1699	-3.65537		1999-06-15	0	0			Bees, Wasps and Ants Recording Society
Osmia uncinata Gerstäcker, 1869	Great Britain		NJ01-10km	57.1699	-3.65537		1999-06-17	0	0			Bees, Wasps and Ants Recording Society
Osmia uncinata Gerstäcker, 1869	Great Britain		NJ01-10km	57.1699	-3.65537		2006-06-09	0	0			Bees, Wasps and Ants Recording Society
Osmia uncinata Gerstäcker, 1869	Great Britain		NJ0120-1km	57.2599	-3.64283		2001-05-26	0	0			North East Scotland Biological Records Centre
Osmia uncinata Gerstäcker, 1869	Great Britain		NJ013205-100m	57.2645	-3.63806		2011-06-02	0	0			Highland Biological Recording Group
Osmia uncinata Gerstäcker, 1869	Great Britain		NJ018208-100m	57.2673	-3.62989		2001-05-26	0	0			Highland Biological Recording Group
Osmia uncinata Gerstäcker, 1869	Great Britain		NJ02-10km	57.2597	-3.6594		2001-06-11	0	0			Bees, Wasps and Ants Recording Society
Osmia uncinata Gerstäcker, 1869	Great Britain		NJ021124-100m	57.1919	-3.62161		2014-06-17	0	0			Highland Biological Recording Group
Osmia uncinata Gerstäcker, 1869	Great Britain		NJ0313-1km	57.1975	-3.60695		2006-06-09	0	0			North East Scotland Biological Records Centre
Osmia uncinata Gerstäcker, 1869	Great Britain		NJ038139-100m	57.2057	-3.59407		2006-06-09	0	0			Highland Biological Recording Group
Osmia uncinata Gerstäcker, 1869	Great Britain		NJ113344-100m	57.3913	-3.47733		2005-07-07	0	0			Highland Biological Recording Group
Osmia uncinata Gerstäcker, 1869	Great Britain		NJ1134-1km	57.3877	-3.48217		2005-07-07	0	0			North East Scotland Biological Records Centre
Osmia uncinata Gerstäcker, 1869	Great Britain		NJ13-10km	57.3516	-3.49734		2005-07-07	0	0			Bees, Wasps and Ants Recording Society
Osmia uncinata Gerstäcker, 1869	Great Britain		NO103921-100m	57.0113	-3.47869		2001-06-13	0	0			National Trust for Scotland
Osmia uncinata Gerstäcker, 1869	Great Britain		NO1092-1km	57.0103	-3.4836		2001-06-13	0	0			North East Scotland Biological Records Centre
Osmia uncinata Gerstäcker, 1869	Great Britain		NO116909-100m	57.0008	-3.45687		2010-06-21	0	0			National Trust for Scotland
Osmia uncinata Gerstäcker, 1869	Great Britain		NO19-10km	56.9924	-3.48288		2001-06-10	0	0			Bees, Wasps and Ants Recording Society
Osmia uncinata Gerstäcker, 1869	Great Britain		NO39-10km	56.9958	-3.1538		2001-06-14	0	0			Bees, Wasps and Ants Recording Society
Osmia uncinata Gerstäcker, 1869	Great Britain		School Wood	57.2651	-3.63583		2011-06-02	0	1	Stewart, Taylor	Highland Biological Recording Group	Global Biodiversity Information Facility		Stewart Taylor
Osmia uncinata Gerstäcker, 1869	Great Britain		Tomnagowan	57.221	-3.71007		2010-05-31	0	1	Stewart, Taylor	Highland Biological Recording Group	Global Biodiversity Information Facility		Murdo Macdonald
Osmia uncinata Gerstäcker, 1869	Italy	Emiglia-Romagna	Poggio Scali	43.8452	11.7885	1511	00.00.1994	0	0			Pagliano, G. (1994): Catalogo degli Imenotteri italiani. IV. Apoidea: Colletidae, Andrenidae, Megachilidae, Anthophoridae, Apidae). Memorie della Società Entomologica Italiana (Genova), 72, 331-467
Osmia uncinata Gerstäcker, 1869	Italy	Trentino Alto Adige/South Tyrol	Cortina d’Ampezzo	46.5409	12.134	1215	00.00.1994	0	0			Pagliano, G. (1994): Catalogo degli Imenotteri italiani. IV. Apoidea: Colletidae, Andrenidae, Megachilidae, Anthophoridae, Apidae). Memorie della Società Entomologica Italiana (Genova), 72, 331-467
Osmia uncinata Gerstäcker, 1869	Italy	Trentino Alto Adige/South Tyrol	Tiers, Sauböden unter St. Sebastian Brandfläche in Kiefernwald, S-Exposition	46.47	11.53	1200		0	0	Kopf, T.		Kopf, T. (2008): Die Bienenfauna (Hymenoptera: Apidae) des Schlerngebietes (Südtirol, Italien) mit Angaben zu den Artengemeinschaften ausgewählter Lebensräume. Gredleriana, 8, 429-466.
Osmia uncinata Gerstäcker, 1869	Italy	Trentino Alto Adige/South Tyrol	Völs, Weißlahn unter Jungschlern Dolomitfelswände sonnig: Latschenhang und Schotterrinne	46.5	11.55	1610		0	0	Kopf, T.		Kopf, T. (2008): Die Bienenfauna (Hymenoptera: Apidae) des Schlerngebietes (Südtirol, Italien) mit Angaben zu den Artengemeinschaften ausgewählter Lebensräume. Gredleriana, 8, 429-466.
Osmia uncinata Gerstäcker, 1869	Italy	Trentino Alto Adige/South Tyrol	Völs, Gfliererweiher Umgebung Föhrenwaldlichtungen und Mähwiese	46.53	11.52	1030		0	0	Kopf, T.		Kopf, T. (2008): Die Bienenfauna (Hymenoptera: Apidae) des Schlerngebietes (Südtirol, Italien) mit Angaben zu den Artengemeinschaften ausgewählter Lebensräume. Gredleriana, 8, 429-466.
Osmia uncinata Gerstäcker, 1869	Italy	Trentino Alto Adige/South Tyrol	Völs, Völser Weiher Umgebung Schilfufer und –wiese, sumpfiges Weidengebüsch, Waldränder	46.52	11.52	1055		0	0	Kopf, T.		Kopf, T. (2008): Die Bienenfauna (Hymenoptera: Apidae) des Schlerngebietes (Südtirol, Italien) mit Angaben zu den Artengemeinschaften ausgewählter Lebensräume. Gredleriana, 8, 429-466.
Osmia uncinata Gerstäcker, 1869	Italy	Trentino Alto Adige/South Tyrol	Tiers, Tschamintal Nadelmischwald, Schotterufer, subalpine Blockflur (11,56/46,48- 11,60/46,49)	46.49	11.6	1550		0	0	Kopf, T.		Kopf, T. (2008): Die Bienenfauna (Hymenoptera: Apidae) des Schlerngebietes (Südtirol, Italien) mit Angaben zu den Artengemeinschaften ausgewählter Lebensräume. Gredleriana, 8, 429-466.
Osmia uncinata Gerstäcker, 1869	Italy	Trentino Alto Adige/South Tyrol	Tiers, St. Zyprian, Weißlahnbad Umgebung Straßenböschung entlang Kiefernwaldrand, Gärten	46.48	11.56	1200		0	0	Kopf, T.		Kopf, T. (2008): Die Bienenfauna (Hymenoptera: Apidae) des Schlerngebietes (Südtirol, Italien) mit Angaben zu den Artengemeinschaften ausgewählter Lebensräume. Gredleriana, 8, 429-466.
Osmia uncinata Gerstäcker, 1869	Italy	Trentino Alto Adige/South Tyrol	Kastelruth-Seis, westlicher Bereich des Hauensteinerwaldes Fichtenwald licht, Forstwegrand und Lichtung	46.53	11.57	1250		0	0	Kopf, T.		Kopf, T. (2008): Die Bienenfauna (Hymenoptera: Apidae) des Schlerngebietes (Südtirol, Italien) mit Angaben zu den Artengemeinschaften ausgewählter Lebensräume. Gredleriana, 8, 429-466.
Osmia uncinata Gerstäcker, 1869	Italy	Trentino Alto Adige/South Tyrol	Bozen	46.4982	11.3556		00.05.1915	0	1	Enslin	Zoologische Staatssammlung München (ZSM)	Schmidt, Stefan Zoologische Staatssammlung München (ZSM)		Haeseler, Volker
Osmia uncinata Gerstäcker, 1869	Italy	Trentino Alto Adige/South Tyrol	Fleimstal: Val Cadino,	46.2955	11.5882		1962-08-20	0	0
Osmia uncinata Gerstäcker, 1869	Italy	Trentino Alto Adige/South Tyrol	Hanigerschwaige, Tiers, Südtirol	46.4658	11.6108		2006-06-24	0	0	Knopf, Timo und Schedl, Wolgang		Kranebitter, Petra & Hilpold, Andreas (2006): GEO-Tag der Artenvielfalt 2006 am Fuß der Vajolettürme (Rosengarten, Gemeinde Tiers, Südtirol, Italien) – Gredleriana – 006: 407 - 454.
Osmia uncinata Gerstäcker, 1869	Italy	Trentino Alto Adige/South Tyrol	Karersee	46.4085	11.5751		1929-05-22	0	1	Stöckhert	Zoologische Staatssammlung München (ZSM)	Schmidt, Stefan Zoologische Staatssammlung München (ZSM)		Haeseler, Volker
Osmia uncinata Gerstäcker, 1869	Italy	Trentino Alto Adige/South Tyrol	Riva del Garda	45.8892	10.8435	500	1966-04-23	1	0	Haeseler, Volker	Oberösterreichisches Landesmuseum Linz - Warnke-Sammlung	Oberösterreichisches Landesmuseum Linz		Haeseler, Volker
Osmia uncinata Gerstäcker, 1869	Italy	Trentino Alto Adige/South Tyrol	Schlern	46.5154	11.5756		7.6.-26.6.1971	0	1	Parré	Oberösterreichisches Landesmuseum Linz	Oberösterreichisches Landesmuseum Linz		Parré
Osmia uncinata Gerstäcker, 1869	Italy	Trentino Alto Adige/South Tyrol	Südtirol, Tiers am Schlern	46.47	11.53	1200	2007-04-14	1	1	Kopf, T.	Kopf, T.	Müller, Andreas (Database)		Müller, Andreas
Osmia uncinata Gerstäcker, 1869	Italy	Trentino Alto Adige/South Tyrol	Tremalzo-Pass, Bergwiese	45.8386	10.6925		2001-05-30	0	1	Flügel, Hans Joachim	Flügel, Hans Joachim	Flügel, Hans Joachim (personal communication)		Flügel, Hans Joachim
Osmia uncinata Gerstäcker, 1869	Italy	Trentino Alto Adige/South Tyrol	Vinschgau Schluderns	46.6656	10.5848	1500	1996-07-23	0	1	Tiefenthaler	Oberösterreichisches Landesmuseum Linz	Oberösterreichisches Landesmuseum Linz		Müller, Andreas
Osmia uncinata Gerstäcker, 1869	Italy	Valle d'Aosta	Aosta - Brusson	45.759	7.731		1999-05-31	0	0	Scheuchl, Erwin	BARCODE OF LIFE DATA SYSTEM	Global Biodiversity Information Facility		Stefan Schmidt
Osmia uncinata Gerstäcker, 1869	Latvia		Bolderāja	57.0238	24.0386		00.00.1938	0	0	Grünwaldt, W.		Grünwaldt, W. (1939) Zur Apiden-Fauna Lettlands II. Die Unterfamilie Megachilinae. Korrespondenzblatt des Naturforscher-Vereins zu Riga, 63, 87-96.
Osmia uncinata Gerstäcker, 1869	Latvia		Kaņieris-See	56.9769	23.446		00.00.1938	0	0	Conde		Grünwaldt, W. (1939) Zur Apiden-Fauna Lettlands II. Die Unterfamilie Megachilinae. Korrespondenzblatt des Naturforscher-Vereins zu Riga, 63, 87-96.
Osmia uncinata Gerstäcker, 1869	Latvia		Lejasciems	57.2802	26.5779		00.00.1938	0	0	Conde		Grünwaldt, W. (1939) Zur Apiden-Fauna Lettlands II. Die Unterfamilie Megachilinae. Korrespondenzblatt des Naturforscher-Vereins zu Riga, 63, 87-96.
Osmia uncinata Gerstäcker, 1869	Latvia		Silini	56.6361	23.6092		00.00.1938	0	0	Conde		Grünwaldt, W. (1939) Zur Apiden-Fauna Lettlands II. Die Unterfamilie Megachilinae. Korrespondenzblatt des Naturforscher-Vereins zu Riga, 63, 87-96.
Osmia uncinata Gerstäcker, 1869	Latvia		Tirza	57.13	26.4136		00.00.1938	0	0	Conde		Grünwaldt, W. (1939) Zur Apiden-Fauna Lettlands II. Die Unterfamilie Megachilinae. Korrespondenzblatt des Naturforscher-Vereins zu Riga, 63, 87-96.
Osmia uncinata Gerstäcker, 1869	Liechtenstein		Balzers, Elltal	47.0507	9.47977	500	1997-04-09	0	1	Bieri, Simon	Bieri, Simon	Centre Suisse de Cartographie de la Faune		Bieri, Simon
Osmia uncinata Gerstäcker, 1869	Liechtenstein		Balzers, Elltal	47.0507	9.47977	500	1998-05-20	0	1	Bieri, Simon	Bieri, Simon	Centre Suisse de Cartographie de la Faune		Bieri, Simon
Osmia uncinata Gerstäcker, 1869	Liechtenstein		Triesenberg, Hinter Profatscheng	47.1397	9.53592	1107	2000-05-05	0	1	Bieri, Simon	Bieri, Simon	Centre Suisse de Cartographie de la Faune		Bieri, Simon
Osmia uncinata Gerstäcker, 1869	Lithuania			53.9366	24.2727		00.00.1995	0	0			Monsevicius, V. (1995): A checklist of wild bee species (Hymenoptera, Apoidea) of Lithuania with data to their distribution and bionomics. New and rare for Lithuania insect species. Records and descriptions of 1994-1995. Institute of Ecology, Lithuanian Entomological Society (Vilnius), pp. 7-144.
Osmia uncinata Gerstäcker, 1869	Lithuania			53.9453	23.9924		00.00.1995	0	0			Monsevicius, V. (1995): A checklist of wild bee species (Hymenoptera, Apoidea) of Lithuania with data to their distribution and bionomics. New and rare for Lithuania insect species. Records and descriptions of 1994-1995. Institute of Ecology, Lithuanian Entomological Society (Vilnius), pp. 7-144.
Osmia uncinata Gerstäcker, 1869	Lithuania			54.0285	24.5714		00.00.1995	0	0			Monsevicius, V. (1995): A checklist of wild bee species (Hymenoptera, Apoidea) of Lithuania with data to their distribution and bionomics. New and rare for Lithuania insect species. Records and descriptions of 1994-1995. Institute of Ecology, Lithuanian Entomological Society (Vilnius), pp. 7-144.
Osmia uncinata Gerstäcker, 1869	Lithuania			54.0306	24.2727		00.00.1995	0	0			Monsevicius, V. (1995): A checklist of wild bee species (Hymenoptera, Apoidea) of Lithuania with data to their distribution and bionomics. New and rare for Lithuania insect species. Records and descriptions of 1994-1995. Institute of Ecology, Lithuanian Entomological Society (Vilnius), pp. 7-144.
Osmia uncinata Gerstäcker, 1869	Lithuania			54.0344	24.4242		00.00.1995	0	0			Monsevicius, V. (1995): A checklist of wild bee species (Hymenoptera, Apoidea) of Lithuania with data to their distribution and bionomics. New and rare for Lithuania insect species. Records and descriptions of 1994-1995. Institute of Ecology, Lithuanian Entomological Society (Vilnius), pp. 7-144.
Osmia uncinata Gerstäcker, 1869	Lithuania			54.6439	25.2183		vor 1940	0	0			Monsevicius, V. (1995): A checklist of wild bee species (Hymenoptera, Apoidea) of Lithuania with data to their distribution and bionomics. New and rare for Lithuania insect species. Records and descriptions of 1994-1995. Institute of Ecology, Lithuanian Entomological Society (Vilnius), pp. 7-144.
Osmia uncinata Gerstäcker, 1869	Lithuania			54.74	25.358		vor 1940	0	0			Monsevicius, V. (1995): A checklist of wild bee species (Hymenoptera, Apoidea) of Lithuania with data to their distribution and bionomics. New and rare for Lithuania insect species. Records and descriptions of 1994-1995. Institute of Ecology, Lithuanian Entomological Society (Vilnius), pp. 7-144.
Osmia uncinata Gerstäcker, 1869	Lithuania			55.575	21.0976		vor 1940	0	0			Monsevicius, V. (1995): A checklist of wild bee species (Hymenoptera, Apoidea) of Lithuania with data to their distribution and bionomics. New and rare for Lithuania insect species. Records and descriptions of 1994-1995. Institute of Ecology, Lithuanian Entomological Society (Vilnius), pp. 7-144.
Osmia uncinata Gerstäcker, 1869	Lithuania			59.9412	24.4242		00.00.1995	0	0			Monsevicius, V. (1995): A checklist of wild bee species (Hymenoptera, Apoidea) of Lithuania with data to their distribution and bionomics. New and rare for Lithuania insect species. Records and descriptions of 1994-1995. Institute of Ecology, Lithuanian Entomological Society (Vilnius), pp. 7-144.
Osmia uncinata Gerstäcker, 1869	Luxembourg	Luxembourg	Lipperscheid	49.9171	6.08156		1960-07-13	1	1			Petit, J. (1972): Notes sur la faune entomologique du Grand-Duché de Luxembourg. Hyménoptères Aculéates. Lambillionea, 71: 76-78.		Petit, J.
Osmia uncinata Gerstäcker, 1869	Netherlands	Noord-Brabant	Breda	51.5808	4.81917		1919-05-11	1	0	765	013	Reemer, Menno (personal communication)		711
Osmia uncinata Gerstäcker, 1869	Netherlands		Alphen	51.4826	4.95424		1995-06-30	0	2	Moussault, F.	Naturalis Biodiversity Center Leiden	Müller, Andreas (Database)		Müller, Andreas
Osmia uncinata Gerstäcker, 1869	Netherlands		Alphen Achter Meertj	51.4982	4.94077		1990-04-01	1	0	860	001	Reemer, Menno (personal communication)	Salix	860
Osmia uncinata Gerstäcker, 1869	Netherlands		Aw Duinen	52.3411	4.56547		1994-05-11	0	1	902	902	Reemer, Menno (personal communication)	Glechoma hederacea	902
Osmia uncinata Gerstäcker, 1869	Netherlands		Baarn	52.209	5.2848		1942-06-03	0	1	999	001	Reemer, Menno (personal communication)	Lupinus polyphyllus	715
Osmia uncinata Gerstäcker, 1869	Netherlands		Baarn	52.209	5.2848		1943-05-14	0	1	999	001	Reemer, Menno (personal communication)	Glechoma hederacea	715
Osmia uncinata Gerstäcker, 1869	Netherlands		Baarn	52.209	5.2848		1944-05-12	0	1	999	001	Reemer, Menno (personal communication)	Glechoma hederacea	715
Osmia uncinata Gerstäcker, 1869	Netherlands		Baarn	52.209	5.2848		1944-05-18	0	1	999	001	Reemer, Menno (personal communication)	Glechoma hederacea	715
Osmia uncinata Gerstäcker, 1869	Netherlands		Baarn	52.209	5.2848		1944-06-27	0	1	999	001	Reemer, Menno (personal communication)		715
Osmia uncinata Gerstäcker, 1869	Netherlands		Baarn	52.209	5.2848		1946-05-11	0	1	999	001	Reemer, Menno (personal communication)	Viola canina	715
Osmia uncinata Gerstäcker, 1869	Netherlands		Baarn	52.209	5.2848		1947-05-26	0	1	999	001	Reemer, Menno (personal communication)	Myosotis arvensis	715
Osmia uncinata Gerstäcker, 1869	Netherlands		Baarn	52.209	5.2848		1949-04-24	1	0	999	001	Reemer, Menno (personal communication)	Myosotis arvensis	715
Osmia uncinata Gerstäcker, 1869	Netherlands		Baarn	52.209	5.2848			0	1	597	001	Reemer, Menno (personal communication)	Glechoma hederacea	715
Osmia uncinata Gerstäcker, 1869	Netherlands		Beekse Bergen Hilvar	51.5167	5.12788		1991-04-10	0	1	181	902	Reemer, Menno (personal communication)	Glechoma hederacea	715
Osmia uncinata Gerstäcker, 1869	Netherlands		Bemelen	50.8422	5.75632		1994-06-07	0	1	508	001	Reemer, Menno (personal communication)		715
Osmia uncinata Gerstäcker, 1869	Netherlands		Bergen De Voert	52.6526	4.65718		1998-04-28	0	1	509	002	Reemer, Menno (personal communication)		509
Osmia uncinata Gerstäcker, 1869	Netherlands		Bergen De Voert	52.6544	4.65715		1993-04-27	0	1	509	002	Reemer, Menno (personal communication)		509
Osmia uncinata Gerstäcker, 1869	Netherlands		Bergen Nh	52.6564	4.6926		1952-04-10	1	0	999	001	Reemer, Menno (personal communication)		715
Osmia uncinata Gerstäcker, 1869	Netherlands		Best Wilhelminakanaa	51.49	5.3584		1994-06-04	0	1	902	902	Reemer, Menno (personal communication)	Rubus	902
Osmia uncinata Gerstäcker, 1869	Netherlands		Bilthoven	52.1281	5.21197		1945-04-13	0	1	999	001	Reemer, Menno (personal communication)		715
Osmia uncinata Gerstäcker, 1869	Netherlands		Borger W	52.9199	6.78487		1993-05-18	0	1	706	706	Reemer, Menno (personal communication)		508
Osmia uncinata Gerstäcker, 1869	Netherlands		Breda	51.5336	4.75465		2002-04-03	1	0	299	299	Reemer, Menno (personal communication)		299
Osmia uncinata Gerstäcker, 1869	Netherlands		Breda	51.5873	4.78117		1910-05-22	0	1	999	009	Reemer, Menno (personal communication)		720
Osmia uncinata Gerstäcker, 1869	Netherlands		Breda, Mastbos	51.5602	4.75268		2003-05-29	0	1	Smit, J. T.	Smit, J. T.	Müller, Andreas (Database)		Müller, Andreas
Osmia uncinata Gerstäcker, 1869	Netherlands		Breda, Mastbosch	51.5532	4.77442		2003-06-14	0	1	779	779	Reemer, Menno (personal communication)		779
Osmia uncinata Gerstäcker, 1869	Netherlands		Chaam,Gilze Weg Ac.120-392-Houndsdraf	51.5162	4.87327		1997-05-21	0	1	Peeters, T.	Naturalis Biodiversity Center Leiden	Müller, Andreas (Database)		Müller, Andreas
Osmia uncinata Gerstäcker, 1869	Netherlands		Chaamse Bossen, Grasland	51.489	4.89767		2019-04-20	1	0	Smit, J. T.	Smit, J. T.	Smit, J. T. (personal communication)		Smit, J. T.
Osmia uncinata Gerstäcker, 1869	Netherlands		Colmond	50.8416	5.92668		1967-03-26	0	1	508	002	Reemer, Menno (personal communication)		509
Osmia uncinata Gerstäcker, 1869	Netherlands		De Dellen	52.3873	5.9924		1995-04-26	1	0	706	001	Reemer, Menno (personal communication)		715
Osmia uncinata Gerstäcker, 1869	Netherlands		De Voert Bergen Nh	52.649	4.65725		1998-04-28	0	1	509	002	Reemer, Menno (personal communication)		509
Osmia uncinata Gerstäcker, 1869	Netherlands		Deelerwoud, Zandplek	52.0687	5.88308		2009-07-03	0	1	Smit, J. T.	Smit, J. T.	Müller, Andreas (Database)	Rubus	Müller, Andreas
Osmia uncinata Gerstäcker, 1869	Netherlands		Delden	52.247	6.67582		2004-04-30	1	0	902	902	Reemer, Menno (personal communication)		902
Osmia uncinata Gerstäcker, 1869	Netherlands		Den Dolder	52.1371	5.24113		1946-05-01	0	1	597	001	Reemer, Menno (personal communication)		715
Osmia uncinata Gerstäcker, 1869	Netherlands		Den Dolder	52.1371	5.24113		00.00.1946	1	0	597	001	Reemer, Menno (personal communication)	Myosotis arvensis	715
Osmia uncinata Gerstäcker, 1869	Netherlands		Deventer, Wechelerveld	52.2784	6.17848		2012-07-24	0	1	Smit, J. T.	Smit, J. T.	Müller, Andreas (Database)		Müller, Andreas
Osmia uncinata Gerstäcker, 1869	Netherlands		Donk	51.436	5.25777		2006-06-11	0	1	417	417	Reemer, Menno (personal communication)		417
Osmia uncinata Gerstäcker, 1869	Netherlands		Doorn, Oude Vuilstort	52.0419	5.38428		2003-05-27	0	1	A98	A98	Reemer, Menno (personal communication)		A98
Osmia uncinata Gerstäcker, 1869	Netherlands		Driebergen, Heidestein	52.0777	5.28667		2009-04-21	0	1	A98	A98	Reemer, Menno (personal communication)		A98
Osmia uncinata Gerstäcker, 1869	Netherlands		Drunense Duinen	51.6426	5.15605		2000-06-02	0	1	902	902	Reemer, Menno (personal communication)	Trifolium repens	902
Osmia uncinata Gerstäcker, 1869	Netherlands		Dwingelderveld, Radiotelescoop	52.8071	6.38082		2018-05-05	0	1	Smit, J. T.	Smit, J. T.	Müller, Andreas (Database)		Smit, J. T.
Osmia uncinata Gerstäcker, 1869	Netherlands		Dwingelderveld, Radiotelescoop	52.8134	6.39638	0	2018-05-05	0	1	Smit, J. T.		Müller, Andreas (Database)		Müller, Andreas
Osmia uncinata Gerstäcker, 1869	Netherlands		Echt	51.1025	5.87262		1949-04-13	0	1	502	502	Reemer, Menno (personal communication)	Rubus	502
Osmia uncinata Gerstäcker, 1869	Netherlands		Echt	51.1025	5.87262		1952-04-27	1	0	502	009	Reemer, Menno (personal communication)		715
Osmia uncinata Gerstäcker, 1869	Netherlands		Echt	51.1025	5.87262		1952-05-13	0	1	502	009	Reemer, Menno (personal communication)		715
Osmia uncinata Gerstäcker, 1869	Netherlands		Elspeet	52.2713	5.79743		1994-05-13	0	1	906	906	Reemer, Menno (personal communication)		906
Osmia uncinata Gerstäcker, 1869	Netherlands		Emmen	52.7837	6.8991		1972-05-03	0	1	723	001	Reemer, Menno (personal communication)	Vaccinium myrtillus	739
Osmia uncinata Gerstäcker, 1869	Netherlands		Epe	52.3604	5.97442		2007-04-27	0	1	827	827	Reemer, Menno (personal communication)		827
Osmia uncinata Gerstäcker, 1869	Netherlands		Exloo	52.8741	6.85767		1971-05-20	0	1	723	001	Reemer, Menno (personal communication)	Vaccinium vitis-idaea	739
Osmia uncinata Gerstäcker, 1869	Netherlands		Gilze Prinsenbosch	51.5339	4.88277		1999-05-16	0	1	453	902	Reemer, Menno (personal communication)		902
Osmia uncinata Gerstäcker, 1869	Netherlands		Gilze-Rijen Vliegveld	51.5699	4.8968		2006-05-06	0	1	F13	F13	Smit, J. T. (personal communication)		F13
Osmia uncinata Gerstäcker, 1869	Netherlands		Glimmen, Appèlbergen (Bij Kleine Veen)	53.1358	6.64213		2007-03-27	1	0	A37	A37	Reemer, Menno (personal communication)		A37
Osmia uncinata Gerstäcker, 1869	Netherlands		Glimmen, Appèlbergen (Bij Kleine Veen)	53.1358	6.64213		2008-05-28	0	1	A37		Reemer, Menno (personal communication)		A37
Osmia uncinata Gerstäcker, 1869	Netherlands		Glimmen, Appèlbergen (Kleine Veen)	53.1358	6.64212		2007-05-20	0	1	A37		Reemer, Menno (personal communication)	Rubus	A37
Osmia uncinata Gerstäcker, 1869	Netherlands		Glimmen, Appèlbergen (Middenheide)	53.1384	6.63947		2007-04-21	1	0	A37	A37	Reemer, Menno (personal communication)		A37
Osmia uncinata Gerstäcker, 1869	Netherlands		Glimmen, Appèlbergen, Kleine Veen	53.1357	6.6419		2009-04-19	0	1	A37		Reemer, Menno (personal communication)	Salix	A37
Osmia uncinata Gerstäcker, 1869	Netherlands		Glimmen, Appèlbergen, Kleine Veen	53.1357	6.6419		2009-05-31	0	1	A37		Reemer, Menno (personal communication)		A37
Osmia uncinata Gerstäcker, 1869	Netherlands		Glimmen, Appèlbergen, Stuifduintjes	53.1367	6.64097		2009-05-31	0	1	A37		Reemer, Menno (personal communication)	Rubus	A37
Osmia uncinata Gerstäcker, 1869	Netherlands		Goirle Halve Maan	51.4804	5.01292		1996-04-26	1	0	453	902	Reemer, Menno (personal communication)		715
Osmia uncinata Gerstäcker, 1869	Netherlands		Groot-Valkenisse	51.4838	3.50112		2004-06-29	1	0	558		Reemer, Menno (personal communication)		558
Osmia uncinata Gerstäcker, 1869	Netherlands		Haelen	51.228	5.94553		1946-06-25	0	1	717	009	Reemer, Menno (personal communication)		717
Osmia uncinata Gerstäcker, 1869	Netherlands		Heemskerk	52.5035	4.66555		1983-07-04	0	1	999	009	Reemer, Menno (personal communication)		715
Osmia uncinata Gerstäcker, 1869	Netherlands		Heeze	51.408	5.61357		2004-05-16	0	2	299	299	Reemer, Menno (personal communication)	Hieracium pilosellum	299
Osmia uncinata Gerstäcker, 1869	Netherlands		Heideberm A12	52.0195	5.83883		1999-05-03	0	1		383	Smit, J. T. (personal communication)	Genista anglica
Osmia uncinata Gerstäcker, 1869	Netherlands		Hulshorsterzand	52.3434	5.7394		2004-05-15	0	1	Smit, J. T.		Müller, Andreas (Database)		Müller, Andreas
Osmia uncinata Gerstäcker, 1869	Netherlands		Ijmuiden, Zuid-Kennemerland	52.4312	4.6079		2006-06-09	0	1	906	906	Reemer, Menno (personal communication)		906
Osmia uncinata Gerstäcker, 1869	Netherlands		Junner Koeland	52.5278	6.46295		1997-05-31	0	1	902	902	Müller, Andreas (Database)	Glechoma hederacea	902
Osmia uncinata Gerstäcker, 1869	Netherlands		Kampina Nieuwe Erven	51.5736	5.29055		2002-04-21	1	0	902	902	Reemer, Menno (personal communication)		902
Osmia uncinata Gerstäcker, 1869	Netherlands		Kampina Valkeniersbaan	51.5646	5.2502		2002-04-21	1	0	902	902	Reemer, Menno (personal communication)	Taraxacum sect. vulgaria	902
Osmia uncinata Gerstäcker, 1869	Netherlands		Klein-Valkenisse, Bijenkuil	51.4838	3.50112		00.00.2006	1	0	558		Reemer, Menno (personal communication)		558
Osmia uncinata Gerstäcker, 1869	Netherlands		Kuulke Legerplaats B	51.2741	5.63082		2000-06-12	0	1		383	Smit, J. T. (personal communication)	Rubus
Osmia uncinata Gerstäcker, 1869	Netherlands		Landgoed Nemelaer	51.5798	5.2285		2003-04-18	1	0	453	902	Reemer, Menno (personal communication)		902
Osmia uncinata Gerstäcker, 1869	Netherlands		Leersum, Sprengkop	52.0185	5.41343		2005-04-11	1	0	A98	A98	Reemer, Menno (personal communication)		A98
Osmia uncinata Gerstäcker, 1869	Netherlands		Leudal (Gemeente)	51.3089	5.89533		2011-05-01	0	1			Smit, J. T. (personal communication)
Osmia uncinata Gerstäcker, 1869	Netherlands		Lheebroekerveld	52.8336	6.44078		1995-05-21	1	1	907	907	Reemer, Menno (personal communication)		907
Osmia uncinata Gerstäcker, 1869	Netherlands		Lheebroekerzand	52.8336	6.44078		1993-05-05	1	1	907	907	Reemer, Menno (personal communication)	Vaccinium	907
Osmia uncinata Gerstäcker, 1869	Netherlands		Lheebroekerzand	52.8336	6.44078		1993-05-10	1	0	907	907	Reemer, Menno (personal communication)	Vaccinium	907
Osmia uncinata Gerstäcker, 1869	Netherlands		Markelo	52.2308	6.49968		1967-05-14	0	1	509	002	Reemer, Menno (personal communication)		509
Osmia uncinata Gerstäcker, 1869	Netherlands		Markelo	52.2308	6.49968		1983-05-07	0	1	999	009	Reemer, Menno (personal communication)		715
Osmia uncinata Gerstäcker, 1869	Netherlands		Meinweg	51.1642	6.10202		2002-06-01	0	1	417	417	Reemer, Menno (personal communication)		417
Osmia uncinata Gerstäcker, 1869	Netherlands		Nekami 1	50.8332	5.77043		1994-06-07	0	1	508	009	Reemer, Menno (personal communication)		508
Osmia uncinata Gerstäcker, 1869	Netherlands		Noordhout, Bospad	52.0671	5.32012		2005-05-12	0	1	A98	A98	Reemer, Menno (personal communication)		A98
Osmia uncinata Gerstäcker, 1869	Netherlands		Nunspeet	52.3702	5.78367		1990-06-10	0	1	706	001	Reemer, Menno (personal communication)		715
Osmia uncinata Gerstäcker, 1869	Netherlands		Nunspeet	52.3703	5.76898		1976-05-07	0	1	999	002	Reemer, Menno (personal communication)		509
Osmia uncinata Gerstäcker, 1869	Netherlands		Nunspeet	52.3703	5.76898		1977-05-07	1	0	999	002	Reemer, Menno (personal communication)		509
Osmia uncinata Gerstäcker, 1869	Netherlands		Nunspeet	52.3703	5.76898		1977-05-19	1	1	576	002	Reemer, Menno (personal communication)		509
Osmia uncinata Gerstäcker, 1869	Netherlands		Nunspeet	52.3703	5.76898		1977-05-24	1	1	576	002	Reemer, Menno (personal communication)		509
Osmia uncinata Gerstäcker, 1869	Netherlands		Nunspeet	52.3703	5.76898		1977-05-26	1	1	576	002	Reemer, Menno (personal communication)		509
Osmia uncinata Gerstäcker, 1869	Netherlands		Nunspeet	52.3703	5.76898		1977-06-13	0	1	576	002	Reemer, Menno (personal communication)		509
Osmia uncinata Gerstäcker, 1869	Netherlands		Nunspeet	52.3703	5.76898		1990-05-27	0	1	706	001	Reemer, Menno (personal communication)		508
Osmia uncinata Gerstäcker, 1869	Netherlands		Nunspeet, De Vennen, Mal. Trap	52.3468	5.7996		2003-06-02	0	1	706	Smit, J. T.	Reemer, Menno (personal communication)		Smit, J. T.
Osmia uncinata Gerstäcker, 1869	Netherlands		Odoorn	52.8473	6.84193		1980-05-12	0	1	723	001	Reemer, Menno (personal communication)	Vaccinium myrtillus	723
Osmia uncinata Gerstäcker, 1869	Netherlands		Oisterwijk	51.58	5.2		1919-06-07	0	1	765	013	Reemer, Menno (personal communication)		711
Osmia uncinata Gerstäcker, 1869	Netherlands		Olterterp	53.0608	6.08828		2000-04-25	0	1	699	699	Reemer, Menno (personal communication)	Taraxacum officinale	699
Osmia uncinata Gerstäcker, 1869	Netherlands		Oude Buisse Heide	51.4988	4.60102		2008-06-30	0	1	D50	D50	Smit, J. T. (personal communication)		D50
Osmia uncinata Gerstäcker, 1869	Netherlands		Overveen	52.3952	4.59385		1974-05-18	0	1	999	001	Reemer, Menno (personal communication)		508
Osmia uncinata Gerstäcker, 1869	Netherlands		Overveen	52.3952	4.59385		1977-05-18	0	1	999	001	Reemer, Menno (personal communication)		715
Osmia uncinata Gerstäcker, 1869	Netherlands		Roosendaal	51.5312	4.45043		1942-05-05	1	1	735	001	Reemer, Menno (personal communication)	Taraxacum	735
Osmia uncinata Gerstäcker, 1869	Netherlands		Schipborg, Bos En Heide	53.0748	6.66783		2007-04-19	0	1	A37	A37	Reemer, Menno (personal communication)		A37
Osmia uncinata Gerstäcker, 1869	Netherlands		Slabroek, Brobbelbies	51.6957	5.61428		2013-06-02	0	1	Smit, J. T.	Smit, J. T.	Müller, Andreas (Database)	Rubus	Müller, Andreas
Osmia uncinata Gerstäcker, 1869	Netherlands		Soesterberg, Oude Vuilstort	52.1285	5.30777		2009-06-30	0	1	A98	A98	Reemer, Menno (personal communication)		A98
Osmia uncinata Gerstäcker, 1869	Netherlands		Soesterberg, Vliegbasis	52.1418	5.26525		2010-07-06	0	1	A98	A98	Reemer, Menno (personal communication)	Rubus	A98
Osmia uncinata Gerstäcker, 1869	Netherlands		Spar	51.2461	5.91712		1948-03-30	0	1	717	009	Reemer, Menno (personal communication)		717
Osmia uncinata Gerstäcker, 1869	Netherlands		Sterksel	51.3342	5.64765		2002-04-04	1	0	299	299	Reemer, Menno (personal communication)		299
Osmia uncinata Gerstäcker, 1869	Netherlands		Tilburg	51.5615	5.06993		1940-05-15	0	1	745	014	Reemer, Menno (personal communication)		745
Osmia uncinata Gerstäcker, 1869	Netherlands		Tilburg	51.5615	5.06993		1981-05-12	0	1	Moussault, F.	Naturalis Biodiversity Center Leiden	Müller, Andreas (Database)	Muscari botryoides	860
Osmia uncinata Gerstäcker, 1869	Netherlands		Tilburg Kaaistoep	51.5343	4.99807		1996-05-16	1	0	453	902	Reemer, Menno (personal communication)		715
Osmia uncinata Gerstäcker, 1869	Netherlands		Tilburg Kaaistoep	51.5344	5.01248		2009-05-08	1	0	453	902	Reemer, Menno (personal communication)		902
Osmia uncinata Gerstäcker, 1869	Netherlands		Tilburg Kaaistoep	51.5425	5.01385		1996-04-19	1	1	Peeters, T.	Naturalis Biodiversity Center Leiden	Müller, Andreas (Database)	Glechoma hederacea	Müller, Andreas
Osmia uncinata Gerstäcker, 1869	Netherlands		Tilburg Kaaistoep	51.5434	5.01385		1998-05-09	0	1	310	902	Reemer, Menno (personal communication)		902
Osmia uncinata Gerstäcker, 1869	Netherlands		Tilburg Kaaistoep	51.5434	5.01385		1998-05-16	0	1	310	902	Reemer, Menno (personal communication)		902
Osmia uncinata Gerstäcker, 1869	Netherlands		Tilburg Kaaistoep	51.547	5.0167		2001-05-25	1	1	902	902	Reemer, Menno (personal communication)	Glechoma hederacea	902
Osmia uncinata Gerstäcker, 1869	Netherlands		Tongeren	52.3517	5.91558		1989-05-07	1	0	999	001	Reemer, Menno (personal communication)		508
Osmia uncinata Gerstäcker, 1869	Netherlands		Tongeren	52.3517	5.91558		1989-05-25	0	1	999	001	Reemer, Menno (personal communication)		508
Osmia uncinata Gerstäcker, 1869	Netherlands		Tongeren	52.3517	5.91558		1990-06-01	0	1	706	001	Reemer, Menno (personal communication)		508
Osmia uncinata Gerstäcker, 1869	Netherlands		Tongeren	52.3517	5.91558		1996-04-29	1	0	706	001	Reemer, Menno (personal communication)		508
Osmia uncinata Gerstäcker, 1869	Netherlands		Tongeren	52.3518	5.90092		1995-04-27	1	0	706	001	Reemer, Menno (personal communication)		715
Osmia uncinata Gerstäcker, 1869	Netherlands		Tongerense Heide	52.3319	5.91535		1998-05-16	0	1	Smit, J. T.	Smit, J. T.	Smit, J. T. (personal communication)		Smit, J. T.
Osmia uncinata Gerstäcker, 1869	Netherlands		Udenhout	51.5976	5.14185		1951-06-04	0	1	594	001	Reemer, Menno (personal communication)	Ajuga reptans	594
Osmia uncinata Gerstäcker, 1869	Netherlands		Valkenswaard Plateaux	51.2716	5.4173		2002-08-03	1	0	299	299	Reemer, Menno (personal communication)		299
Osmia uncinata Gerstäcker, 1869	Netherlands		Valkenswaard/ Borkel	51.2716	5.4173		2002-04-02	1	0	299	299	Reemer, Menno (personal communication)		383
Osmia uncinata Gerstäcker, 1869	Netherlands		Venhorst - Voskuilenheuvel	51.6167	5.7211		2011-05-10	0	1			Smit, J. T. (personal communication)
Osmia uncinata Gerstäcker, 1869	Netherlands		Venlo	51.3616	6.16255		1941-06-04	0	1	727	001	Reemer, Menno (personal communication)		727
Osmia uncinata Gerstäcker, 1869	Netherlands		Venlo	51.3616	6.16255		1946-04-03	1	0	717	009	Reemer, Menno (personal communication)		717
Osmia uncinata Gerstäcker, 1869	Netherlands		Venlo	51.3727	6.17238		1942-06-08	0	1	727	013	Reemer, Menno (personal communication)		J.P. van Lith
Osmia uncinata Gerstäcker, 1869	Netherlands		Waalwyk	51.6694	5.06918		1951-04-25	1	0	717	009	Reemer, Menno (personal communication)		717
Osmia uncinata Gerstäcker, 1869	Netherlands		Weerter Bos	51.3009	5.67398		2002-06-09	0	1	Smit, J. T.	Smit, J. T.	Müller, Andreas (Database)		Smit, J. T.
Osmia uncinata Gerstäcker, 1869	Netherlands		Weerterbos	51.283	5.65953		1985-05-10	1	0	452	452	Reemer, Menno (personal communication)		383
Osmia uncinata Gerstäcker, 1869	Netherlands		Weerterbos	51.292	5.64525		1997-05-03	1	0	383	383	Reemer, Menno (personal communication)	Salix aurita	902
Osmia uncinata Gerstäcker, 1869	Netherlands		Weerterbos	51.301	5.6453		1997-05-03	0	1	383	383	Reemer, Menno (personal communication)	Taraxacum officinale	902
Osmia uncinata Gerstäcker, 1869	Netherlands		Weerterbos	51.301	5.6453		1997-05-17	0	1	383	383	Reemer, Menno (personal communication)	Ajuga reptans_x000D_	902
Osmia uncinata Gerstäcker, 1869	Netherlands		Weerterbos	51.3099	5.67403		2000-04-20	0	1	557	383	Reemer, Menno (personal communication)
Osmia uncinata Gerstäcker, 1869	Netherlands		Wellenseind, Lage Mierde	51.4269	5.14277		2004-07-01	0	1	383	383	Reemer, Menno (personal communication)	Rubus	383
Osmia uncinata Gerstäcker, 1869	Netherlands		Winterswijk, Borkense Baan	51.9233	6.76683		2011-05-14	0	1	A03	A03	Reemer, Menno (personal communication)		A03
Osmia uncinata Gerstäcker, 1869	Netherlands		Zeist, De Krakeling	52.0976	5.28358		2007-04-23	0	1	A98	A98	Reemer, Menno (personal communication)		A98
Osmia uncinata Gerstäcker, 1869	Norway	Hedmark	eidskog,leirsjøen	59.8897	12.1664		2009-07-02	0	1	Ødegaard, Frode	Norsk institutt for naturforskning	https://artskart.artsdatabanken.no		Ødegaard, Frode
Osmia uncinata Gerstäcker, 1869	Norway	Innlandet	Hamar	60.8656	11.2713		2014-07-01	0	0	Sydenham, Markus; Lorange, Jenny B.; Hermansen, Irene	Norges miljø- og biovitenskapelige universitet (NMBU)	https://artskart.artsdatabanken.no		Sydenham, Markus
Osmia uncinata Gerstäcker, 1869	Norway	Innlandet	nord-aurdal,dalen, nord-aurdal	61.029	9.2		1962-06-21	0	0	Løken, A.	Universitetsmuseet i Bergen (UiB)	https://artskart.artsdatabanken.no		Mang.best. Etk.
Osmia uncinata Gerstäcker, 1869	Norway	Nordland	Leirbekkøra; Laksfors	65.6301	13.2693		2016-07-14	0	1	Lindemann, Jon Peder	Naturhistorisk Museum Oslo (UiO)	https://artskart.artsdatabanken.no		Lindemann, Jon Peder
Osmia uncinata Gerstäcker, 1869	Norway	Oslo	Oslo	59.8335	10.8839		2015-07-01	0	1	Sydenham, Markus; Lorange, Jenny B.; Hermansen, Irene	Norges miljø- og biovitenskapelige universitet (NMBU)	https://artskart.artsdatabanken.no		Sydenham, Markus
Osmia uncinata Gerstäcker, 1869	Norway	Oslo	Oslo	59.9847	10.716		2014-05-01	1	1	Sydenham, Markus; Lorange, Jenny B.; Hermansen, Irene	Norges miljø- og biovitenskapelige universitet (NMBU)	https://artskart.artsdatabanken.no		Sydenham, Markus
Osmia uncinata Gerstäcker, 1869	Norway	Rogaland	forsand,lerang	58.939	6.028		1934-07-17	0	1	Meidell, O.	Universitetsmuseet i Bergen (UiB)	https://artskart.artsdatabanken.no		Meidell
Osmia uncinata Gerstäcker, 1869	Norway	Rogaland	sauda,slettedalen, sauda	59.785	6.495		1935-05-21	0	1	Meidell, O.	Universitetsmuseet i Bergen (UiB)	https://artskart.artsdatabanken.no		Meidell, O.
Osmia uncinata Gerstäcker, 1869	Norway	Rogaland	sauda,svandalen, sauda	59.623	6.244		1935-05-23	0	1	Meidell, O.	Universitetsmuseet i Bergen (UiB)	https://artskart.artsdatabanken.no		Meidell, O.
Osmia uncinata Gerstäcker, 1869	Norway	Troms og Finnmark	karasjok,buddasnjarga	69.3613	25.8075		1997-07-04	0	1	Morten, Falck	Natural History Museum of Oslo (NHMO)	https://artskart.artsdatabanken.no		Norén, Lars
Osmia uncinata Gerstäcker, 1869	Norway	Troms og Finnmark	karasjok,gargia	69.81	24.48		1955-07-25	0	0	Løken, A.	Universitetsmuseet i Bergen (UiB)	https://artskart.artsdatabanken.no		Mang.best. Etk.
Osmia uncinata Gerstäcker, 1869	Norway	Trøndelag	melhus,gyllvatnet	63.0986	10.2995		2009-05-19	0	0	Ødegaard, Frode	Norsk institutt for naturforskning	https://artskart.artsdatabanken.no		Ødegaard, Frode
Osmia uncinata Gerstäcker, 1869	Norway	Vestfold	Sande, Kudalsdammen [NW]	59.5842	10.2841		2004-07-01	0	1	Hansen, Lars Ove		Global Biodiversity Information Facility		Hansen, Lars Ove
Osmia uncinata Gerstäcker, 1869	Norway	Vestfold og Telemark	drangedal,steinknapp ø	59.081	9.02355		00.00.2008	1	0	Sverdrup-Thygeson,Anne ; Ødegaard, Frode	Norsk institutt for naturforskning	https://artskart.artsdatabanken.no		Ødegaard, Frode
Osmia uncinata Gerstäcker, 1869	Norway	Vestfold og Telemark	kragerø,jomfruland	58.8564	9.58191		1979-06-11	1	0	Torstein, Kvamme	Norsk institutt for naturforskning	https://artskart.artsdatabanken.no		Lars Norén
Osmia uncinata Gerstäcker, 1869	Norway	Vestfold og Telemark	kragerø,øytangen, jomfruland	58.8805	9.60752		2009-06-17	0	1	Ødegaard, Frode	Norsk institutt for naturforskning	https://artskart.artsdatabanken.no		Ødegaard, Frode
Osmia uncinata Gerstäcker, 1869	Norway	Vestfold og Telemark	notodden,litleherad	59.6274	9.22614		2010-06-23	0	1	Ødegaard, Frode	Norsk institutt for naturforskning	https://artskart.artsdatabanken.no		Ødegaard, Frode
Osmia uncinata Gerstäcker, 1869	Norway	Vestland	bergen,kråkenes, fana	60.333	5.317		1965-07-18	0	0	Løken, A.	Universitetsmuseet i Bergen (UiB)	https://artskart.artsdatabanken.no		Mang.best. Etk.
Osmia uncinata Gerstäcker, 1869	Norway	Vestland	kvinnherad,varaldsøy	60.09	5.97		1958-06-08	0	0	Løken, A.	Universitetsmuseet i Bergen (UiB)	https://artskart.artsdatabanken.no		Mang.best. Etk.
Osmia uncinata Gerstäcker, 1869	Norway	Viken	aurskog-høland,mikkelsrud	59.9746	11.6684		2009-07-02	0	1	Ødegaard, Frode	Natural History Museum of Oslo (NHMO)	https://artskart.artsdatabanken.no		Ødegaard, Frode
Osmia uncinata Gerstäcker, 1869	Norway	Viken	flå	60.375	9.64527		2013-06-01	0	0	Sydenham, Markus; Lorange, Jenny B.; Hermansen, Irene	Norges miljø- og biovitenskapelige universitet (NMBU)	https://artskart.artsdatabanken.no		Sydenham, Markus
Osmia uncinata Gerstäcker, 1869	Norway	Viken	Hokksund, Lilleby	59.7794	9.92667	100	2012-05-01	0	1	Ødegaard, Frode	Norsk institutt for naturforskning	https://artskart.artsdatabanken.no		Ødegaard, Frode
Osmia uncinata Gerstäcker, 1869	Norway	Viken	hole,hurumåsen s i – langs grusveien på vestsiden	60.1147	10.2965		2013-05-31	0	1	Olsen, K.M.	Universitetsmuseet i Bergen (UiB)	https://artskart.artsdatabanken.no		Olsen, K.M.
Osmia uncinata Gerstäcker, 1869	Norway	Viken	Monaryggen	59.5679	11.3119	100	2012-05-23	0	0	Ødegaard, Frode	Norsk institutt for naturforskning	https://artskart.artsdatabanken.no		Ødegaard, Frode
Osmia uncinata Gerstäcker, 1869	Norway	Viken	Øvre Eiker	59.7161	9.95171	10	2014-06-01	0	1	Sydenham, Markus; Lorange, Jenny B.; Hermansen, Irene	Norges miljø- og biovitenskapelige universitet (NMBU)	https://artskart.artsdatabanken.no		Sydenham, Markus
Osmia uncinata Gerstäcker, 1869	Norway	Viken	ringerike	60.2807	9.78011		2014-05-01	0	0	Sydenham, Markus; Lorange, Jenny B.; Hermansen, Irene	Norges miljø- og biovitenskapelige universitet (NMBU)	https://artskart.artsdatabanken.no		Sydenham, Markus
Osmia uncinata Gerstäcker, 1869	Norway	Viken	ringerike, busund	60.1291	10.2425		2010-06-06	0	1	Fjellberg, Arne	Norsk institutt for naturforskning	https://artskart.artsdatabanken.no		Ødegaard, Frode
Osmia uncinata Gerstäcker, 1869	Norway	Viken	ringerike,prestemoen [east]	60.1323	10.2271		2010-05-20	0	1	Hansen, Lars Ove	Natural History Museum of Oslo (NHMO)	https://artskart.artsdatabanken.no		Norén, Lars
Osmia uncinata Gerstäcker, 1869	Norway	Viken	rollag,bråtåsen	60.0202	9.25186		1994-07-01	0	1	Hansen, Lars Ove ; Sagvolden, Bjørn Arve	Natural History Museum of Oslo (NHMO)	https://artskart.artsdatabanken.no		Norén, Lars
Osmia uncinata Gerstäcker, 1869	Norway	Viken	rollag,tråen saga	60.0072	9.28182		1994-06-01	0	1	Sagvolden, Bjørn Arve	Natural History Museum of Oslo (NHMO)	https://artskart.artsdatabanken.no		Norén, Lars
Osmia uncinata Gerstäcker, 1869	Norway	Viken	rollag,vårviken	60.0145	9.27086		1994-07-01	0	1	Hansen, Lars Ove ; Sagvolden, Bjørn Arve	Natural History Museum of Oslo (NHMO)	https://artskart.artsdatabanken.no		Norén, Lars
Osmia uncinata Gerstäcker, 1869	Norway	Viken	rollag,veggli	60.0425	9.15473		1995-06-19	0	1	Sagvolden, Bjørn Arve	Natural History Museum of Oslo (NHMO)	https://artskart.artsdatabanken.no		Norén, Lars
Osmia uncinata Gerstäcker, 1869	Norway	Viken	røyken,kinnartangen, hyggen	59.7118	10.3358		1991-05-02	0	1	Hansen, Lars Ove	Natural History Museum of Oslo (NHMO)	https://artskart.artsdatabanken.no		van der G. Zanden
Osmia uncinata Gerstäcker, 1869	Norway	Viken	sarpsborg	59.284	11.1089		2014-07-01	0	0	Sydenham, Markus; Lorange, Jenny B.; Hermansen, Irene	Norges miljø- og biovitenskapelige universitet (NMBU)	https://artskart.artsdatabanken.no		Sydenham, Markus
Osmia uncinata Gerstäcker, 1869	Norway	Viken	sarpsborg,eide, tune	59.2922	11.0837		2002-07-12	0	1	Olsen, Thor Jan	Natural History Museum of Oslo (NHMO)	https://artskart.artsdatabanken.no		Norén, Lars
Osmia uncinata Gerstäcker, 1869	Norway	Viken	sørum,dammyra, sørliløkka	60.0051	11.1735		1996-08-06	0	1	Hansen, Lars Ove ; Rinden, Helge	Natural History Museum of Oslo (NHMO)	https://artskart.artsdatabanken.no		Norén, Lars
Osmia uncinata Gerstäcker, 1869	Norway	Viken	sørum,dammyra, sørliløkka	60.0051	11.1735		2008-07-26	0	1	Sørlibråten, Ove	Natural History Museum of Oslo (NHMO)	https://artskart.artsdatabanken.no		Norén, Lars
Osmia uncinata Gerstäcker, 1869	Norway	Viken	Velta, Gol, Bu	60.6801	8.83818	5	2017-07-06	0	0	Olsen, Mikaela	Norwegian Entomological Society	https://artskart.artsdatabanken.no		Feeding
Osmia uncinata Gerstäcker, 1869	Norway	Viken	Velta, Gol, Vi	60.6733	8.81575		2017-07-06	0	1	Olsen, Mikaela	so2-bugs	nef
Osmia uncinata Gerstäcker, 1869	Norway	Viken	Vestby	59.5731	10.6764	10	2014-06-01	0	1	Sydenham, Markus; Lorange, Jenny B.; Hermansen, Irene	Norges miljø- og biovitenskapelige universitet (NMBU)	https://artskart.artsdatabanken.no		Sydenham, Markus
Osmia uncinata Gerstäcker, 1869	Norway	Viken	Vestby	59.5731	10.6764	10	2015-07-01	0	1	Sydenham, Markus; Lorange, Jenny B.; Hermansen, Irene	Norges miljø- og biovitenskapelige universitet (NMBU)	https://artskart.artsdatabanken.no		Sydenham, Markus
Osmia uncinata Gerstäcker, 1869	Norway			59.3442	11.0799		2014-05-01	1	1	Sydenham, Markus; Lorange, Jenny B.; Hermansen, Irene		NMBU:MINA		Sydenham, Markus
Osmia uncinata Gerstäcker, 1869	Norway			59.3456	11.077		2014-07-01	0	1	Sydenham, Markus; Lorange, Jenny B.; Hermansen, Irene		NMBU:MINA		Sydenham, Markus
Osmia uncinata Gerstäcker, 1869	Norway			60.2769	9.82947		2014-05-01	0	1	Sydenham, Markus; Lorange, Jenny B.; Hermansen, Irene		NMBU:MINA		Sydenham, Markus
Osmia uncinata Gerstäcker, 1869	Norway			60.8673	11.266		2014-07-01	0	1	Sydenham, Markus; Lorange, Jenny B.; Hermansen, Irene		NMBU:MINA		Sydenham, Markus
Osmia uncinata Gerstäcker, 1869	Poland		Heidebrink (Międzywodzie)	54.0056	14.6969		00.00.1918	0	1	Schröder		Blüthgen, Paul August Viktor (1919): Die Bienenfauna Pommerns. – Entomologische Zeitung Stettin – 80: 65 - 131.
Osmia uncinata Gerstäcker, 1869	Poland		Körlin an der Persante (Karlino)	54.0333	15.8764		00.00.1915	1	0	Blüthgen, Paul August Viktor		Blüthgen, Paul August Viktor (1919): Die Bienenfauna Pommerns. – Entomologische Zeitung Stettin – 80: 65 - 131.
Osmia uncinata Gerstäcker, 1869	Poland		Namslau (Namysłów)	51.0761	17.7231			0	0			Dittrich, R. (1902): Verzeichnis der bisher in Schlesien aufgefundenen Hymenopteren. 1. Apidae – Zeitschrift für Entomologie Breslau – NF_28: 21 - 54.
Osmia uncinata Gerstäcker, 1869	Poland		Nimptsch (Duda).	50.72	16.8349		00.00.1909	0	0			Dittrich, R. (1909): Hymenopterologische Bemerkungen – Zeitschrift für Entomologie Breslau – JH_2: 38 - 46.
Osmia uncinata Gerstäcker, 1869	Poland		Rosocha, pine forest	54.1004	16.611		2003-05-09	0	1
Osmia uncinata Gerstäcker, 1869	Poland		Rosocha, pine forest	54.1004	16.611		2003-05-30	1	0
Osmia uncinata Gerstäcker, 1869	Poland		Rügenwalde (Darłowo)	54.4222	16.4111		00.00.1916	3	1	Blüthgen, Paul August Viktor		Blüthgen, Paul August Viktor (1919): Die Bienenfauna Pommerns. – Entomologische Zeitung Stettin – 80: 65 - 131.
Osmia uncinata Gerstäcker, 1869	Poland		Seelitz (Żelice)	52.8325	17.0694		00.00.1918	1	4	Blüthgen, Paul August Viktor		Blüthgen, Paul August Viktor (1919): Die Bienenfauna Pommerns. – Entomologische Zeitung Stettin – 80: 65 - 131.
Osmia uncinata Gerstäcker, 1869	Russia	Amur Province	40 km NE Fevralsk	52.6939	131.302		2004-06-20	0	0	Proshchalykin, Maxim Yu.		Proshchalykin, Maxim Yu. (personal communication)		Proshchalykin, Maxim Yu.
Osmia uncinata Gerstäcker, 1869	Russia	Irkutsk Province	Irkutsk, left bank of Lena	60.7575	115.644		1963-07-17	1	0	Zhelokhovtsev		Romankova, T. G. (1984): Megachilid bees of the genus Osmia Panz. (Hymenoptera, Megachilidae) of the fauna of the Far East. Entomologicheskoe Obozrenie. Revue d’Entomologie de l’URSS, 63, 358-364.
Osmia uncinata Gerstäcker, 1869	Russia	Kemerovo	Ust-Kabyrza	52.82	88.3847	419	2018-07-01	0	1	Drelih, Luzyanin, Sidorov, Taritsa	Byvaltsev, Alexandr	Romankova, T. G. (1984): Megachilid bees of the genus Osmia Panz. (Hymenoptera, Megachilidae) of the fauna of the Far East. Entomologicheskoe Obozrenie. Revue d’Entomologie de l’URSS, 63, 358-364.		Müller, Andreas
Osmia uncinata Gerstäcker, 1869	Russia	Khabarovsk Territory	50 km SE Snezhnyi, Dzhaur River	49.8428	138.19		2005-07-02	0	0	Proshchalykin, Maxim Yu.		Proshchalykin, Maxim Yu. (personal communication)		Proshchalykin, Maxim Yu.
Osmia uncinata Gerstäcker, 1869	Russia	Khabarovsk Territory	Gorny, Myaochan Ridge	50.7633	136.422		1988-05-28	0	0	Proshchalykin, Maxim Yu.		Far East. Entomologicheskoe Obozrenie. Revue d’Entomologie de l’URSS,		Proshchalykin, Maxim Yu.
Osmia uncinata Gerstäcker, 1869	Russia	Khabarovsk Territory	Komsomolsk on Amur, Silinsky Park	50.5698	136.962		2001-05-11	0	0	Proshchalykin, Maxim Yu.		Romankova, T. G. (1984): Megachilid bees of the genus Osmia Panz. (Hymenoptera, Megachilidae) of the fauna of the Far East. Entomologicheskoe Obozrenie. Revue d’Entomologie de l’URSS, 63, 358-364.		Proshchalykin, Maxim Yu.
Osmia uncinata Gerstäcker, 1869	Russia	Magadan Province	Seymchan	62.9266	152.405		1975-07-29	0	1	Marshakov		Romankova, T. G. (1984): Megachilid bees of the genus Osmia Panz. (Hymenoptera, Megachilidae) of the fauna of the Far East. Entomologicheskoe Obozrenie. Revue d’Entomologie de l’URSS, 63, 358-364.
Osmia uncinata Gerstäcker, 1869	Russia	Primorky Territory	Lazovsky Nature Reserve	43.1147	133.942		14.06-18.07.1979	0	6	Romankov		Romankova, T. G. (1984): Megachilid bees of the genus Osmia Panz. (Hymenoptera, Megachilidae) of the fauna of the Far East. Entomologicheskoe Obozrenie. Revue d’Entomologie de l’URSS, 63, 358-364.
Osmia uncinata Gerstäcker, 1869	Russia	Primorky Territory	Lazovsky Nature Reserve	43.1147	133.942		25.05-12.07.1979	0	2	Romankov		Romankova, T. G. (1984): Megachilid bees of the genus Osmia Panz. (Hymenoptera, Megachilidae) of the fauna of the Far East. Entomologicheskoe Obozrenie. Revue d’Entomologie de l’URSS, 63, 358-364.
Osmia uncinata Gerstäcker, 1869	Russia	Primorky Territory	Benevskoe	43.1514	133.766		1980-05-25	0	0	Proshchalykin, Maxim Yu.		Proshchalykin, Maxim Yu. (personal communication)		Proshchalykin, Maxim Yu.
Osmia uncinata Gerstäcker, 1869	Russia	Primorky Territory	Kievka	42.91	133.685		1979-06-13	0	0	Proshchalykin, Maxim Yu.		Proshchalykin, Maxim Yu. (personal communication)		Proshchalykin, Maxim Yu.
Osmia uncinata Gerstäcker, 1869	Russia	Primorky Territory	Ussury Nature Reserve	43.6381	132.322		1979-06-12	0	0	Proshchalykin, Maxim Yu.		Proshchalykin, Maxim Yu. (personal communication)		Proshchalykin, Maxim Yu.
Osmia uncinata Gerstäcker, 1869	Russia	Yakut Republic	Dungalakh	60.3998	134.566		1928-06-14	1	0	Nikiforov		Romankova, T. G. (1984): Megachilid bees of the genus Osmia Panz. (Hymenoptera, Megachilidae) of the fauna of the Far East. Entomologicheskoe Obozrenie. Revue d’Entomologie de l’URSS, 63, 358-364.
Osmia uncinata Gerstäcker, 1869	Russia	Yakut Republic	Khaptagay	61.7822	129.789		07.07–20.07.1974	0	4	Kamenskaya		Romankova, T. G. (1984): Megachilid bees of the genus Osmia Panz. (Hymenoptera, Megachilidae) of the fauna of the Far East. Entomologicheskoe Obozrenie. Revue d’Entomologie de l’URSS, 63, 358-364.
Osmia uncinata Gerstäcker, 1869	Russia	Yakutia	Olekminsk	60.3842	120.463		1974-06-30	0	0	Proshchalykin, Maxim Yu.		Proshchalykin, Maxim Yu. (personal communication)		Proshchalykin, Maxim Yu.
Osmia uncinata Gerstäcker, 1869	Russia	Yakutia	Yakutsk	62.0314	129.596		1906-05-28	0	0	Proshchalykin, Maxim Yu.		Proshchalykin, Maxim Yu. (personal communication)		Proshchalykin, Maxim Yu.
Osmia uncinata Gerstäcker, 1869	Russia		Aldan River	60.3429	134.44		1911-07-11	0	1	Olenin		Romankova, T. G. (1984): Megachilid bees of the genus Osmia Panz. (Hymenoptera, Megachilidae) of the fauna of the Far East. Entomologicheskoe Obozrenie. Revue d’Entomologie de l’URSS, 63, 358-364.
Osmia uncinata Gerstäcker, 1869	Russia		Altai Republic, 68 km SW Kurai	50.1674	87.7932		2007-07-11	0	1	Belokobylskij, S.	ZISP	Müller, Andreas (Database)		Müller, Andreas
Osmia uncinata Gerstäcker, 1869	Russia		Irkutsk	52.2889	104.3		1979-06-08	1	1	Kraus, M.	Oberösterreichisches Landesmuseum Linz - Warnke-Sammlung	Oberösterreichisches Landesmuseum Linz		Haeseler, Volker
Osmia uncinata Gerstäcker, 1869	Russia		Kolyma River	61.8333	149.333		1992-07-11	0	0	Bishop, J. A.	BBSL	Global Biodiversity Information Facility		M. Rightmyer 2010
Osmia uncinata Gerstäcker, 1869	Russia		Kolyma River, 25 km SW Aborigen	61.8393	149.01		1992-07-18	0	0	Bishop, J. A.	BBSL	Global Biodiversity Information Facility		M. Rightmyer 2010
Osmia uncinata Gerstäcker, 1869	Russia		Korpad, Abbruchkante an Prjamushka	43.2644	134.129	174	2001-06-07	0	2	Quest, Michael		Quest, Michael (2009): Artbestand, Ökologie und Habitatwahl von Bienen ausgewählter Offenlebensräume im Lazovski Zapovednik (Hymenoptera, Apiformes). – Entomofauna Suppl. – S15: 1 - 356.
Osmia uncinata Gerstäcker, 1869	Russia		Korpad, Abbruchkante an Prjamushka	43.2725	134.13	181	2001-05-14	0	1	Quest, Michael		Quest, Michael (2009): Artbestand, Ökologie und Habitatwahl von Bienen ausgewählter Offenlebensräume im Lazovski Zapovednik (Hymenoptera, Apiformes). – Entomofauna Suppl. – S15: 1 - 356.
Osmia uncinata Gerstäcker, 1869	Russia		Korpad, Abbruchkante an Prjamushka	43.2725	134.13	181	3.5.-14.5.2001	0	1	Quest, Michael		Quest, Michael (2009): Artbestand, Ökologie und Habitatwahl von Bienen ausgewählter Offenlebensräume im Lazovski Zapovednik (Hymenoptera, Apiformes). – Entomofauna Suppl. – S15: 1 - 356.
Osmia uncinata Gerstäcker, 1869	Russia		Korpad, Brachflächen östlich des Kordons	43.2739	134.141	180	2001-06-23	0	1	Quest, Michael		Quest, Michael (2009): Artbestand, Ökologie und Habitatwahl von Bienen ausgewählter Offenlebensräume im Lazovski Zapovednik (Hymenoptera, Apiformes). – Entomofauna Suppl. – S15: 1 - 356.
Osmia uncinata Gerstäcker, 1869	Russia		Korpad, Kiessandschüttung an Prjamushka	43.2631	134.119	175	6.6-20.6 2001	0	1	Quest, Michael		Quest, Michael (2009): Artbestand, Ökologie und Habitatwahl von Bienen ausgewählter Offenlebensräume im Lazovski Zapovednik (Hymenoptera, Apiformes). – Entomofauna Suppl. – S15: 1 - 356.
Osmia uncinata Gerstäcker, 1869	Russia		Korpad, Kiessandschüttung an Prjamushka	43.2644	134.129	174	6.6-20.6 2001	0	1	Quest, Michael		Quest, Michael (2009): Artbestand, Ökologie und Habitatwahl von Bienen ausgewählter Offenlebensräume im Lazovski Zapovednik (Hymenoptera, Apiformes). – Entomofauna Suppl. – S15: 1 - 356.
Osmia uncinata Gerstäcker, 1869	Russia		Korpad, Südexponierte Abbruchkante an Prjamushka	43.2694	134.128	153	2002-04-15	1	0	Quest, Michael		Quest, Michael (2009): Artbestand, Ökologie und Habitatwahl von Bienen ausgewählter Offenlebensräume im Lazovski Zapovednik (Hymenoptera, Apiformes). – Entomofauna Suppl. – S15: 1 - 356.
Osmia uncinata Gerstäcker, 1869	Russia		Korpad, Trockene Flutrinne der Prjamushka	43.2667	134.129	204	2001-06-28	0	2	Quest, Michael		Quest, Michael (2009): Artbestand, Ökologie und Habitatwahl von Bienen ausgewählter Offenlebensräume im Lazovski Zapovednik (Hymenoptera, Apiformes). – Entomofauna Suppl. – S15: 1 - 356.
Osmia uncinata Gerstäcker, 1869	Russia		Lim, Laplandsky Nature Reserve	67,650	32.6523		2013-07-24/08-02	0	0	Humala, Andrei		Private insect collections
Osmia uncinata Gerstäcker, 1869	Russia		Mordovia, Mordovski Nature Reserve, qr. 406	54.8167	43.3333		2016-07-02	0	1	Ruchin, A.B.	Levchenko, T. V.	Müller, Andreas (Database)		Müller, Andreas
Osmia uncinata Gerstäcker, 1869	Russia		Moscow Pr., Voimezhniy	55.5667	39.85		2014-06-21	1	0	Levchenko, T. V.	Levchenko, T. V.	Müller, Andreas (Database)		Müller, Andreas
Osmia uncinata Gerstäcker, 1869	Russia		Naryan-Mar	67,62277	53.0192		2013-07-03	0	0	Kozlov, M. ; Zverev, V.	Zoological collections (MZH)	Zoological collections MZH
Osmia uncinata Gerstäcker, 1869	Russia		Olekminsk [= Olyokminsk]	60.3705	120.431		1974-07-31	0	2	Pesenko		Romankova, T. G. (1984): Megachilid bees of the genus Osmia Panz. (Hymenoptera, Megachilidae) of the fauna of the Far East. Entomologicheskoe Obozrenie. Revue d’Entomologie de l’URSS, 63, 358-364.
Osmia uncinata Gerstäcker, 1869	Russia		Vidrino env., Irkutsk vil.	51.433	104.633	470	5.-8.07.2002	0	2	Straka, Jakub	Straka, Jakub	Straka, Jakub (personel communication)		B.Tkalců
Osmia uncinata Gerstäcker, 1869	Slovakia		Nove Mesto	48.1678	17.1342			0	1	Hofer, A.	Oberösterreichisches Landesmuseum Linz	Oberösterreichisches Landesmuseum Linz		Tkalců, Borek
Osmia uncinata Gerstäcker, 1869	Slovakia		Podbanské (Hohe Tatra)	49.1468	19.9072		1977-07-13	0	0	Lucas		Zdenek Pádr, Josef Lukás (1994): Stachelhautflügler aus dem Gebiet des Hohen Tatragebirges in der Slovakischen Republik (Hymenoptera-Aculeata). – Linzer biologische Beiträge – 0026_2: 887 - 904.
Osmia uncinata Gerstäcker, 1869	Slovakia		Sekule env.	48.6195	16.9991		2008-06-03	0	0	Bogusch, Petr	Bogusch, Petr	Bogusch, Petr (personal communication)		Bogusch, Petr
Osmia uncinata Gerstäcker, 1869	Slovenia		Brezovica near Lj	46.0239	14.4173		00.00.1999	0	0			Gogala, Andrej (1999): Bee fauna of Slovenia: Checklist of species (Hymenoptera: Apoidea). Scopolia, 42, 1-79
Osmia uncinata Gerstäcker, 1869	Slovenia		Kranj, Brdo, VM52	46.2735	14.3801		2007-05-08	0	1	Gogala, Andrej	Gogala, Andrej	Gogala, Andrej (2014): Čebele znoske v Sloveniji (Hymenoptera: Apoidea: Megachilidae) Megachilid bees of Slovenia (Hymenoptera: Apoidea: Megachilidae) – Scopolia, Journal of the Slovenian Museum of Natural History, Ljubljana – 80: 1 - 195.		Gogala, Andrej
Osmia uncinata Gerstäcker, 1869	Slovenia		Kranj, Brdo, VM52	46.2737	14.379		2007-05-08	0	1	Gogala, Andrej		Gogala, Andrej (2014): Čebele znoske v Sloveniji (Hymenoptera: Apoidea: Megachilidae) Megachilid bees of Slovenia (Hymenoptera: Apoidea: Megachilidae) – Scopolia, Journal of the Slovenian Museum of Natural History, Ljubljana – 80: 1 - 195.
Osmia uncinata Gerstäcker, 1869	Slovenia		Log, Lukovica, VL59	46.1843	14.7898		1993-04-06	1	0	Gogala, Andrej		Gogala, Andrej (2014): Čebele znoske v Sloveniji (Hymenoptera: Apoidea: Megachilidae) Megachilid bees of Slovenia (Hymenoptera: Apoidea: Megachilidae) – Scopolia, Journal of the Slovenian Museum of Natural History, Ljubljana – 80: 1 - 195.
Osmia uncinata Gerstäcker, 1869	Slovenia		Log, Lukovica, VL59	46.1878	14.8374		1993-04-06	1	0	Gogala, Andrej	Gogala, Andrej	Gogala, Andrej (2014): Čebele znoske v Sloveniji (Hymenoptera: Apoidea: Megachilidae) Megachilid bees of Slovenia (Hymenoptera: Apoidea: Megachilidae) – Scopolia, Journal of the Slovenian Museum of Natural History, Ljubljana – 80: 1 - 195.		Gogala, Andrej
Osmia uncinata Gerstäcker, 1869	Slovenia		Sp. Brnik	46.2285	14.4846		00.00.1999	0	0			Gogala, Andrej (1999): Bee fauna of Slovenia: Checklist of species (Hymenoptera: Apoidea). Scopolia, 42, 1-79
Osmia uncinata Gerstäcker, 1869	Slovenia		Sp. Brnik, VM62	46.2285	14.4846		1993-06-01	0	1	Gogala, Andrej		Gogala, Andrej (2014): Čebele znoske v Sloveniji (Hymenoptera: Apoidea: Megachilidae) Megachilid bees of Slovenia (Hymenoptera: Apoidea: Megachilidae) – Scopolia, Journal of the Slovenian Museum of Natural History, Ljubljana – 80: 1 - 195.
Osmia uncinata Gerstäcker, 1869	Slovenia		Spodnji Brnik, VM62	46.2288	14.4846		1993-06-01	0	1	Gogala, Andrej	Gogala, Andrej	Gogala, Andrej (2014): Čebele znoske v Sloveniji (Hymenoptera: Apoidea: Megachilidae) Megachilid bees of Slovenia (Hymenoptera: Apoidea: Megachilidae) – Scopolia, Journal of the Slovenian Museum of Natural History, Ljubljana – 80: 1 - 195.		Gogala, Andrej
Osmia uncinata Gerstäcker, 1869	Sweden	Ångermanland	Halsviksravinen	62.9214	18.4261		2006-06-16	0	1	Stenmark, Magnus (Genom )	Artportalen	ArtDatabanken		Norén, Lars
Osmia uncinata Gerstäcker, 1869	Sweden	Ångermanland	Långed: Backheden	63.5954	19.7015			1	0	Hellqvist, Sven	Artportalen	ArtDatabanken
Osmia uncinata Gerstäcker, 1869	Sweden	Ångermanland	Rödåsen	62.8081	18.202		2006-06-09	0	1	Larsson, Sofia	Artportalen	ArtDatabanken		Norén, Lars
Osmia uncinata Gerstäcker, 1869	Sweden	Blekinge	Askeboda	56.1748	15.1797		2007-05-23	0	1	Franzen, Markus	Artportalen	ArtDatabanken		Norén, Lars
Osmia uncinata Gerstäcker, 1869	Sweden	Dalsland	10B0f Stenvallen färgsk.	59.0135	11.9114			0	1	Stenmark, Magnus	Artportalen	ArtDatabanken		Sven Hellqvist 2017
Osmia uncinata Gerstäcker, 1869	Sweden	Dalsland	Glanarekullen 08B8g	58.5086	12.0671			1	5	Stenmark, Magnus ; Hallqvist, Joel	Artportalen	ArtDatabanken		Sven Hellqvist 2018
Osmia uncinata Gerstäcker, 1869	Sweden	Dalsland	Korpeknatten T28-1	58.9457	12.4566			1	0	Post, Peter	Artportalen	Länsstyrelsen Västra Götaland		Norén, Lars
Osmia uncinata Gerstäcker, 1869	Sweden	Dalsland	Korpeknatten T28-2	58.9461	12.455			0	1	Post, Peter	Artportalen	Länsstyrelsen Västra Götaland		Norén, Lars
Osmia uncinata Gerstäcker, 1869	Sweden	Dalsland	Korpeknatten T28-4	58.947	12.4541			0	1	Post, Peter	Artportalen	Länsstyrelsen Västra Götaland		Norén, Lars
Osmia uncinata Gerstäcker, 1869	Sweden	Halland	Äskhults by	57.4274	12.2835		2016-06-12	1	0	Holmström, Göran	Artportalen	ArtDatabanken
Osmia uncinata Gerstäcker, 1869	Sweden	Halland	Hertered	56.7308	13.0661		2016-05-13	0	1	Larsson, Krister	Artportalen	ArtDatabanken
Osmia uncinata Gerstäcker, 1869	Sweden	Öland	Fagerrör	57.3161	17.1022		2013-07-02	0	2	Holmström, Göran	Artportalen	ArtDatabanken
Osmia uncinata Gerstäcker, 1869	Sweden	Öland	Glömminge Pingärdet Hygge	56.7097	16.527		2019-06-19	0	1	Johansson, Niklas	Artportalen	ArtDatabanken
Osmia uncinata Gerstäcker, 1869	Sweden	Östergötland	Basteberg NNO, 400 m (F15)	58.1128	15.2013			0	2	Antonsson, Kjell	Artportalen	ArtDatabanken		Norén, Lars
Osmia uncinata Gerstäcker, 1869	Sweden	Östergötland	Kohagen N, 700 m (M2)	58.1025	15.1663			0	1	Antonsson, Kjell	Artportalen	ArtDatabanken		Norén, Lars
Osmia uncinata Gerstäcker, 1869	Sweden	Östergötland	Mon NNO, 140m (F25, f d M4)	58.149	15.6238			0	1	Antonsson, Kjell	Artportalen	ArtDatabanken		Norén, Lars
Osmia uncinata Gerstäcker, 1869	Sweden	Östergötland	Nästången	57.8861	15.3845		2016-06-03	0	1	Persson, Olof	Artportalen	Länsstyrelsen Östergötland		Norén, Lars
Osmia uncinata Gerstäcker, 1869	Sweden	Östergötland	Nygård NV, 760m (M5)	58.1219	15.6596			0	1	Antonsson, Kjell	Artportalen	ArtDatabanken		Norén, Lars
Osmia uncinata Gerstäcker, 1869	Sweden	Östergötland	Örbäcken NO, 600m (M17)	58.0927	15.2337			0	1	Antonsson, Kjell	Artportalen	ArtDatabanken		Norén, Lars
Osmia uncinata Gerstäcker, 1869	Sweden	Östergötland	Skeppeberg	57.9621	15.673			0	0	Jörneskog, Anders	Artportalen	ArtDatabanken
Osmia uncinata Gerstäcker, 1869	Sweden	Östergötland	Tinnerö eklandskap, Dämmet	58.3618	15.6038		2015-06-11	0	1	Ivarsson, Tobias	Artportalen	ArtDatabanken		Sven Hellqvist 2016
Osmia uncinata Gerstäcker, 1869	Sweden	Östergötland	Tinnerö eklandskap, Vägkanter norr om Dämmet	58.3633	15.6049		2015-06-11	0	1	Ivarsson, Tobias	Artportalen	ArtDatabanken		Sven Hellqvist 2016
Osmia uncinata Gerstäcker, 1869	Sweden	Östergötland	Vinäs OSO, 1000m (F24)	57.9353	15.5668			0	1	Antonsson, Kjell	Artportalen	ArtDatabanken		Norén, Lars
Osmia uncinata Gerstäcker, 1869	Sweden	Skåne	Vinterbo	55.7007	13.5062		2016-05-01	1	0	Holmström, Göran	Artportalen	ArtDatabanken
Osmia uncinata Gerstäcker, 1869	Sweden	Skåne	Vombs fure	55.6437	13.5372		2004-05-29	0	1	Östrand, Fredrik	Artportalen	ArtDatabanken
Osmia uncinata Gerstäcker, 1869	Sweden	Småland	Bjällingsmåla	56.931	15.9084			0	0	Björn, Stefan ; Johansson, Niklas	Artportalen	Nybro kommun		Johansson, Niklas
Osmia uncinata Gerstäcker, 1869	Sweden	Småland	Brantehallar	56.955	15.9959			0	1	Persson, Olof	Artportalen	Nybro kommun		Sven Hellqvist
Osmia uncinata Gerstäcker, 1869	Sweden	Småland	Längs vägen till Stensjö by	57.3396	16.4695		2017-05-12	0	0	Westling, Gunnar	Artportalen	ArtDatabanken
Osmia uncinata Gerstäcker, 1869	Sweden	Småland	Repperda Åryd	57.3991	15.3612		2012-05-25	1	0	Johansson, Niklas	Artportalen	ArtDatabanken
Osmia uncinata Gerstäcker, 1869	Sweden	Småland	Rudenstams fruktodling	57.8462	14.2822		2015-05-21	0	0	Johansson, Niklas	Artportalen	ArtDatabanken
Osmia uncinata Gerstäcker, 1869	Sweden	Södermanland	Österhagsdeponin	59.2087	18.1554		2016-05-12	1	0	Abenius, Johan	Artportalen	ArtDatabanken
Osmia uncinata Gerstäcker, 1869	Sweden	Södermanland	Trosa	58.8986	17.5497		1997-06-12	1	0	Ivarsson, Tobias	Artportalen	ArtDatabanken		S. Hellqvist
Osmia uncinata Gerstäcker, 1869	Sweden	Torne lappmark	Kiruna malmbangård 1	67.8716	20.1968			0	1	Stenmark, Magnus ; Hallqvist, Joel	Artportalen	ArtDatabanken		Sven Hellqvist 2018
Osmia uncinata Gerstäcker, 1869	Sweden	Uppland	Angarnsjöängen	59.553	18.1586		2001-05-08	0	1	Cavalli, Johan	Artportalen	ArtDatabanken
Osmia uncinata Gerstäcker, 1869	Sweden	Uppland	Grönvreten 1km O	59.7692	17.6677		2011-05-20	0	0	Cederberg, Björn	Artportalen	ArtDatabanken
Osmia uncinata Gerstäcker, 1869	Sweden	Uppland	Kraftledningsgata 2, Täby	59.4768	18.0853			0	1	Andersson, Petter	Artportalen	ArtDatabanken		Norén, Lars
Osmia uncinata Gerstäcker, 1869	Sweden	Värmland	Leonardsberg, Grums	59.6607	13.1124		2008-05-31	0	1	Tuneld, Mikael	Artportalen	ArtDatabanken
Osmia uncinata Gerstäcker, 1869	Sweden	Värmland	Norra Mossen	59.7374	14.2349			0	1	Franc, Niklas ; Börjesson, Erik	Artportalen	ArtDatabanken		Sven Hellqvist 2019
Osmia uncinata Gerstäcker, 1869	Sweden	Västergötland	Brunarp 06C2f	57.3738	12.9229			0	1	Stenmark, Magnus ; Hallqvist, Joel	Artportalen	ArtDatabanken		Sven Hellqvist 2018
Osmia uncinata Gerstäcker, 1869	Sweden	Västergötland	Kaffestugan Lyckan	57.6906	12.0321		2018-05-06	0	0	Lindholm, Mattias	Artportalen	ArtDatabanken
Osmia uncinata Gerstäcker, 1869	Sweden	Västergötland	Kuleskog 08C1a	58.2112	12.4635			0	1	Stenmark, Magnus ; Hallqvist, Joel	Artportalen	ArtDatabanken		Sven Hellqvist 2018
Osmia uncinata Gerstäcker, 1869	Sweden	Västergötland	Nossebro 08C1d	58.1853	12.7355			0	1	Stenmark, Magnus	Artportalen	Länsstyrelsen Västra Götaland		Sven Hellqvist 2016
Osmia uncinata Gerstäcker, 1869	Sweden	Västergötland	Sandliden 07D0a	57.7126	13.298			0	1	Stenmark, Magnus ; Hallqvist, Joel	Artportalen	ArtDatabanken		Sven Hellqvist 2018
Osmia uncinata Gerstäcker, 1869	Sweden	Västergötland	Tranemossen 08E8c	58.55	14.2881			0	1	Stenmark, Magnus ; Hallqvist, Joel	Artportalen	ArtDatabanken		Sven Hellqvist 2018
Osmia uncinata Gerstäcker, 1869	Sweden	Västmanland	Halvarsbenning	60.0907	15.7776		2016-06-06	0	1	Abenius, Johan	Artportalen	ArtDatabanken		Norén, Lars
Osmia uncinata Gerstäcker, 1869	Sweden		3km NO Strömbacka	61.976	16.7719		2001-07-01	0	1	Hellqvist, Sven	Egen	Global Biodiversity Information Facility		Hellqvist, Sven
Osmia uncinata Gerstäcker, 1869	Sweden		4 km V Borgsjö	64.192	17.6983		1992-06-08	1	0	Hellqvist, Sven	Egen	Global Biodiversity Information Facility		Hellqvist, Sven
Osmia uncinata Gerstäcker, 1869	Sweden		Adolfsberg	59.2428	15.177		1914-05-01	1	0	Jansson, Anton	Swedish Museum of Natural History (NRM)	Global Biodiversity Information Facility		Jansson, Anton (1880-1963); Hallin, Gunnar
Osmia uncinata Gerstäcker, 1869	Sweden		Adolfsberg, Örebro	59.2446	15.1875		00.00.1880	1	0	Jansson, Anton	Swedish Museum of Natural History (NRM)	Global Biodiversity Information Facility		Jansson, Anton (1880-1963)
Osmia uncinata Gerstäcker, 1869	Sweden		Agön	61.5439	17.4328		2000-08-05	1	1	Persson, Marit (Genom)	Artport	Global Biodiversity Information Facility		Genom Artdatabanken (MP) SLU
Osmia uncinata Gerstäcker, 1869	Sweden		Åkeholm 0550/4250	56.2884	14.7435		2011-05-30	1	0	Hallin, Gunnar	Egen	Global Biodiversity Information Facility		Hallin, Gunnar
Osmia uncinata Gerstäcker, 1869	Sweden		Åkeholm 0550/4290	56.2884	14.7441		2011-05-31	0	1	Hallin, Gunnar	Egen	Global Biodiversity Information Facility		Hallin, Gunnar
Osmia uncinata Gerstäcker, 1869	Sweden		Alskog	57.3755	18.6057		2003-05-28	0	1	Abenius, Johan	Artport	Global Biodiversity Information Facility		Abenius, Johan
Osmia uncinata Gerstäcker, 1869	Sweden		Åmmestorp 0150/4450	58.8909	15.0151		1975-07-01	0	1	Hallin, Gunnar	Egen	Global Biodiversity Information Facility		Hallin, Gunnar
Osmia uncinata Gerstäcker, 1869	Sweden		Ängaryd SE0230208	57.8696	15.1968		2014-07-20	0	1	Stenmark, Magnus	Artport	Global Biodiversity Information Facility		Magnus Stenmark
Osmia uncinata Gerstäcker, 1869	Sweden		Änggårde, Rone	57.1892	18.4941		2001-05-15	3	0	Norén, Lars	Egen	Global Biodiversity Information Facility		Norén, Lars
Osmia uncinata Gerstäcker, 1869	Sweden		Annan anordning ickesand (Ludvika-Borlänge-Falun) id. 181	60.3013	15.2336		2010-06-20	0	1	Stenmark, Magnus	Artport	Global Biodiversity Information Facility		Stenmark, Magnus
Osmia uncinata Gerstäcker, 1869	Sweden		Åsbro 1750/7050	58.9953	15.058		2005-06-09	1	0	Hallin, Gunnar	Egen	Global Biodiversity Information Facility		Hallin, Gunnar
Osmia uncinata Gerstäcker, 1869	Sweden		Åsbro 1950/7050	58.997	15.0579		1995-05-27	1	0	Hallin, Gunnar	Egen	Global Biodiversity Information Facility		Hallin, Gunnar
Osmia uncinata Gerstäcker, 1869	Sweden		Åsbro 1950/7050	58.997	15.0579		1998-05-31	0	1	Hallin, Gunnar	Egen	Global Biodiversity Information Facility		Hallin, Gunnar
Osmia uncinata Gerstäcker, 1869	Sweden		Åsbro 1950/7050	58.997	15.0579		1998-06-14	0	1	Hallin, Gunnar	Egen	Global Biodiversity Information Facility		Hallin, Gunnar
Osmia uncinata Gerstäcker, 1869	Sweden		Askeboda	56.1748	15.1797		2007-05-23	0	0		Artport	Global Biodiversity Information Facility		Markus Franzen
Osmia uncinata Gerstäcker, 1869	Sweden		Astensmåla 0650/3050	56.2891	14.7241		2009-06-16	0	1	Hallin, Gunnar	Artport	Global Biodiversity Information Facility		Hallin, Gunnar
Osmia uncinata Gerstäcker, 1869	Sweden		Åsvedal 4550/9850	58.2118	16.6532		1988-06-12	0	1	Hallin, Gunnar	Egen	Global Biodiversity Information Facility		Hallin, Gunnar
Osmia uncinata Gerstäcker, 1869	Sweden		Axsjöfallet 7350/0250	58.9561	15.1144		2006-07-01	0	1	Hallin, Gunnar	Egen	Global Biodiversity Information Facility		Hallin, Gunnar
Osmia uncinata Gerstäcker, 1869	Sweden		Bäckeby-Basgärde	57.3549	15.762		2011-04-28	0	1	Johansson, Niklas	Artport	Global Biodiversity Information Facility		Johansson, Niklas
Osmia uncinata Gerstäcker, 1869	Sweden		Bästerna 5950/6650	57.0523	14.4317		1990-05-20	0	1	Hallin, Gunnar	Stockholm	Global Biodiversity Information Facility		Hallin, Gunnar
Osmia uncinata Gerstäcker, 1869	Sweden		Bergvik	61.2618	16.818		1956-01-01	1	0	Höglund, Nils	Swedish Museum of Natural History (NRM)	Global Biodiversity Information Facility		Nils Höglund
Osmia uncinata Gerstäcker, 1869	Sweden		Bingsjö	61.0223	15.6508		1949-07-27	0	1	Persson, Marit (Genom)	Swedish Museum of Natural History (NRM)	Global Biodiversity Information Facility		Genom Artdatabanken (MP) SLU
Osmia uncinata Gerstäcker, 1869	Sweden		Biparadiset	56.8672	14.7809		2012-05-15	0	1	Ivarsson, Tobias	Artport	Global Biodiversity Information Facility		Tobias Ivarsson
Osmia uncinata Gerstäcker, 1869	Sweden		Bjursnäs, Björnlunda	59.0341	17.1037		1993-08-04	0	1	Norén, Lars	Egen	Global Biodiversity Information Facility		Norén, Lars
Osmia uncinata Gerstäcker, 1869	Sweden		Bockagölarna Hökensås	58.0434	14.1221		2012-05-19	1	0	Johansson, Niklas	Artport	Global Biodiversity Information Facility		Johansson, Niklas
Osmia uncinata Gerstäcker, 1869	Sweden		Böda_sandtag_Sjöstorp, väster	57.3097	17.0922		2008-05-10	1	0	Lager, Helena (Genom)	Egen	Global Biodiversity Information Facility		Genom Länsstyrelsen Kalmar
Osmia uncinata Gerstäcker, 1869	Sweden		Bråt 200 m S	57.6895	12.913		2014-05-23	0	6	Nolbrant, Peter	Peter, N.	Global Biodiversity Information Facility		Peter Nolbrant
Osmia uncinata Gerstäcker, 1869	Sweden		Brattforsheden, Klingertjärnen, 600 m V	59.6217	13.9251		1989-07-01	0	1	Berglind, Sven-Åke	Egen	Global Biodiversity Information Facility		Sven-Åke Berglind, Mikael Tjernberg
Osmia uncinata Gerstäcker, 1869	Sweden		Bro	58.4254	11.4829		1945-07-11	0	1	Wieslander, Edgar V.	Swedish Museum of Natural History (NRM)	Global Biodiversity Information Facility		Wieslander, Edgar V. (1896-1987)
Osmia uncinata Gerstäcker, 1869	Sweden		Bro vatten ickesand (Ludvika-Borlänge-Falun) id. 209	60.5395	15.6182		2010-05-20	0	1	Stenmark, Magnus	Artport	Global Biodiversity Information Facility		Stenmark, Magnus
Osmia uncinata Gerstäcker, 1869	Sweden		Bromsens, Gnesta	58.9791	17.2059		1996-06-11	0	1	Norén, Lars	Egen	Global Biodiversity Information Facility		Norén, Lars
Osmia uncinata Gerstäcker, 1869	Sweden		Brösarp	55.7167	14.1167		1955-06-28	0	1		Swedish Museum of Natural History (NHRS)	Global Biodiversity Information Facility
Osmia uncinata Gerstäcker, 1869	Sweden		Brösarp	55.7244	14.1048		1955-06-28	0	0		Swedish Museum of Natural History (NRM)	Global Biodiversity Information Facility		Olov Lundblad (1890-1970)
Osmia uncinata Gerstäcker, 1869	Sweden		Brösarp	55.7329	14.1255		2008-05-10	0	1		Artport	Global Biodiversity Information Facility		Magnus Stenmark
Osmia uncinata Gerstäcker, 1869	Sweden		Bussjön N Ytterboda	63.8562	20.5864		1992-05-28	1	0	Hellqvist, Sven	Egen	Global Biodiversity Information Facility		Hellqvist, Sven
Osmia uncinata Gerstäcker, 1869	Sweden		Bygget 6750/8750	58.8616	15.2636		1981-05-08	2	0	Hallin, Gunnar	Egen	Global Biodiversity Information Facility		Hallin, Gunnar
Osmia uncinata Gerstäcker, 1869	Sweden		Byrum Sandvik	57.2271	16.9584		1981-06-03	0	1	Svensson, Bo G.	Artport	Global Biodiversity Information Facility		Svensson, Bo G.
Osmia uncinata Gerstäcker, 1869	Sweden		Byske	64.9572	21.1867		1956-07-13	0	1	Erlandsson, Stellan O.	Swedish Museum of Natural History (NRM)	Global Biodiversity Information Facility		Erlandsson, Stellan O.
Osmia uncinata Gerstäcker, 1869	Sweden		Djupsjön 3050/0550	58.9175	15.1204		1975-07-19	0	1	Hallin, Gunnar	Egen	Global Biodiversity Information Facility		Hallin, Gunnar
Osmia uncinata Gerstäcker, 1869	Sweden		Drags udde	57.4869	15.5823		2010-05-15	0	1	Johansson, Niklas	Artport	Global Biodiversity Information Facility		Johansson, Niklas
Osmia uncinata Gerstäcker, 1869	Sweden		Drags udde	57.4929	15.5868		2012-06-16	0	1	Östrand, Fredrik	Artport	Global Biodiversity Information Facility		Östrand, Fredrik
Osmia uncinata Gerstäcker, 1869	Sweden		Duvelycke	56.6219	14.226		2006-06-08	0	2	Nilsson, Sven G.	Artport	Global Biodiversity Information Facility		Sven G. Nilsson
Osmia uncinata Gerstäcker, 1869	Sweden		Edefors	66.2211	20.8625		1956-07-05	0	1	Erlandsson, Stellan O.	Swedish Museum of Natural History (NRM)	Global Biodiversity Information Facility		Erlandsson, Stellan O.
Osmia uncinata Gerstäcker, 1869	Sweden		Ehrendals kvarn, Gnesta	58.9782	17.2928		2005-06-08	0	1	Norén, Lars	Artport	Global Biodiversity Information Facility		Norén, Lars
Osmia uncinata Gerstäcker, 1869	Sweden		Ekorrtorp, Gnesta	59.0767	17.3145		1997-05-13	1	0	Norén, Lars	Egen	Global Biodiversity Information Facility		Norén, Lars
Osmia uncinata Gerstäcker, 1869	Sweden		Fågelsundet	60.6023	17.9457		1987-07-05	1	0	Svensson, Bo G.	Egen	Global Biodiversity Information Facility		Svensson, Bo G.
Osmia uncinata Gerstäcker, 1869	Sweden		Fagerhult (1)	57.9925	14.1471		2005-06-30	0	1	Abenius, Johan ; Apelqvist, Matilda	Artport	Global Biodiversity Information Facility		Abenius, Johan ; Apelqvist, Matilda
Osmia uncinata Gerstäcker, 1869	Sweden		Fagerrör	57.3161	17.1022		2012-05-11	1	0	Holmström, Göran	Artport	Global Biodiversity Information Facility		Holmström, Göran
Osmia uncinata Gerstäcker, 1869	Sweden		Fagersta	60.0085	15.7756		2009-05-17	0	1	Stenmark, Magnus	Artport	Global Biodiversity Information Facility		Magnus Larsson
Osmia uncinata Gerstäcker, 1869	Sweden		Falun	60.6025	15.646		2009-04-19	1	0	Stenmark, Magnus	Egen	Global Biodiversity Information Facility		Magnus Larsson
Osmia uncinata Gerstäcker, 1869	Sweden		Färda väst	57.016	13.5455		2009-07-02	0	1	Örjan, Fritz	Artport	Global Biodiversity Information Facility		Örjan Fritz
Osmia uncinata Gerstäcker, 1869	Sweden		File hajdar SV brottet	57.7191	18.7063		2015-07-17	0	1	Strand, Linda	Artport	Global Biodiversity Information Facility		Linda Strand
Osmia uncinata Gerstäcker, 1869	Sweden		Finnstatorp, Årdala	59.0099	16.7895		1980-07-06	0	1	Norén, Lars	Egen	Global Biodiversity Information Facility		Norén, Lars
Osmia uncinata Gerstäcker, 1869	Sweden		Fjärås bräcka	57.4458	12.1865		2015-06-14	0	1	Noresson, Jan-Åke ;Svensson, Ingvor; Hultengren, Sverker; Persson, Freddy	Artport	Global Biodiversity Information Facility		Noresson, Jan-Åke ;Svensson, Ingvor; Hultengren, Sverker; Persson, Freddy
Osmia uncinata Gerstäcker, 1869	Sweden		Fjärås Bräcka	57.448	12.1841		2015-06-14	0	0	Persson, Freddy	Artport	Global Biodiversity Information Facility		Holmström, Göran
Osmia uncinata Gerstäcker, 1869	Sweden		Forsby, Döderhult	57.2438	16.3444		2001-06-24	0	1	Norén, Lars	Egen	Global Biodiversity Information Facility		Norén, Lars
Osmia uncinata Gerstäcker, 1869	Sweden		Fredriksfors	61.7872	16.6173		1956-07-17	0	1	Erlandsson, Stellan O.	Swedish Museum of Natural History (NRM)	Global Biodiversity Information Facility		Erlandsson, Stellan O.
Osmia uncinata Gerstäcker, 1869	Sweden		Fruhammar	57.8282	15.4908		2010-07-05	0	1	Karlsson, Tommy	Artport	Global Biodiversity Information Facility		Tommy Karlsson
Osmia uncinata Gerstäcker, 1869	Sweden		Gälltorp, Råby-Rönö	58.847	16.9407		1997-06-06	0	1	Norén, Lars	Egen	Global Biodiversity Information Facility		Norén, Lars
Osmia uncinata Gerstäcker, 1869	Sweden		Gersebacken	58.747	14.3456		2014-05-28	0	1	Karlsson, Lilian	Artport	Global Biodiversity Information Facility		Stenström, Anna ; Karlsson, Lilian
Osmia uncinata Gerstäcker, 1869	Sweden		Gimo	60.1709	18.1807		1947-05-25	1	0	Erlandsson, Stellan O.	Swedish Museum of Natural History (NRM)	Global Biodiversity Information Facility		Erlandsson, Stellan O.
Osmia uncinata Gerstäcker, 1869	Sweden		Gödeshult	57.01	15.7526		2007-06-14	0	1	Ivarsson, Tobias	Egen	Global Biodiversity Information Facility		Tobias Ivarsson
Osmia uncinata Gerstäcker, 1869	Sweden		Golfb. N tennistält	59.8381	17.6356		2004-06-01	0	1	Stenmark, Magnus	Annan	Global Biodiversity Information Facility		Magnus Larsson
Osmia uncinata Gerstäcker, 1869	Sweden		Graby	57.8849	15.2582		2005-05-30	1	0	Karlsson, Tommy	Artport	Global Biodiversity Information Facility		Tommy Karlsson
Osmia uncinata Gerstäcker, 1869	Sweden		Grästorp (Fliseryd)	57.163	16.3267		1995-05-31	0	1	Norén, Lars	Egen	Global Biodiversity Information Facility		Norén, Lars
Osmia uncinata Gerstäcker, 1869	Sweden		Grinderum, Fliseryd	57.154	16.3431		1995-06-26	0	2	Norén, Lars	Egen	Global Biodiversity Information Facility		Norén, Lars
Osmia uncinata Gerstäcker, 1869	Sweden		Grindvik, Gnesta	58.97	17.2229		1994-05-14	1	0	Norén, Lars	Egen	Global Biodiversity Information Facility		Norén, Lars
Osmia uncinata Gerstäcker, 1869	Sweden		Grindvik, Gnesta	58.97	17.2229		1994-07-05	0	1	Norén, Lars	Egen	Global Biodiversity Information Facility		Norén, Lars
Osmia uncinata Gerstäcker, 1869	Sweden		Grissjön 6650/0150	58.86	15.1146		1985-07-09	0	1	Hallin, Gunnar	Egen	Global Biodiversity Information Facility		Hallin, Gunnar
Osmia uncinata Gerstäcker, 1869	Sweden		Grönskog, Fliseryd	57.1629	16.3433		1995-06-06	0	1	Norén, Lars	Egen	Global Biodiversity Information Facility		Norén, Lars
Osmia uncinata Gerstäcker, 1869	Sweden		Grycken	60.3108	14.4693		2006-05-12	0	0	Skog, Uno (Genom)	Artport	Global Biodiversity Information Facility		Genom Länsstyrelsen Dalarnas län
Osmia uncinata Gerstäcker, 1869	Sweden		Grythyttan, Grecken , Lohällan	59.7058	14.536		1972-07-04	0	1	Persson, Marit (Genom)	Swedish Museum of Natural History (NRM)	Global Biodiversity Information Facility		Genom Artdatabanken (MP) SLU
Osmia uncinata Gerstäcker, 1869	Sweden		Gubböle: Kangerobäcken	63.8941	19.9402		2008-06-06	0	1	Hellqvist, Sven (Genom)	Artport	Global Biodiversity Information Facility		Sven Hellqvist
Osmia uncinata Gerstäcker, 1869	Sweden		Gullbäck, Gnesta	59.0314	17.3474		1983-07-09	0	1	Norén, Lars	Egen	Global Biodiversity Information Facility		Norén, Lars
Osmia uncinata Gerstäcker, 1869	Sweden		Håbo-Tibble	59.5884	17.6632		1941-06-19	0	1	Selander, Sten	Swedish Museum of Natural History (NRM)	Global Biodiversity Information Facility		Sten Selander (1891-1957)
Osmia uncinata Gerstäcker, 1869	Sweden		Hall, Gnesta	59.0148	17.2248		1994-07-04	0	1	Norén, Lars	Egen	Global Biodiversity Information Facility		Norén, Lars
Osmia uncinata Gerstäcker, 1869	Sweden		Hällbacken, Endre	57.6132	18.4082		2001-05-20	0	1	Norén, Lars	Egen	Global Biodiversity Information Facility		Norén, Lars
Osmia uncinata Gerstäcker, 1869	Sweden		Hälleforsdynen, (5)	59.7889	14.4954		2004-06-23	0	1	Hallin, Gunnar	Artport	Global Biodiversity Information Facility		Hallin, Gunnar
Osmia uncinata Gerstäcker, 1869	Sweden		Hälleskog	56.8628	15.7174		2011-06-04	1	0	Johansson, Niklas	Artport	Global Biodiversity Information Facility		Johansson, Niklas
Osmia uncinata Gerstäcker, 1869	Sweden		Halvarsbenning, Skogvaktarbostället NV	60.0901	15.7787		2014-06-27	0	1	Abenius, Johan	Johan, A.	Global Biodiversity Information Facility		Abenius, Johan
Osmia uncinata Gerstäcker, 1869	Sweden		Halviksravinen	62.9214	18.4261		2006-06-16	1	0	Larsson, Sofia	Egen	Global Biodiversity Information Facility		Larsson, Sofia
Osmia uncinata Gerstäcker, 1869	Sweden		Harparbol lund	59.8754	18.0014		1950-05-29	0	1	Lundblad, Olov	Artport	Global Biodiversity Information Facility		Lundblad, Olov (1890-1970)
Osmia uncinata Gerstäcker, 1869	Sweden		Hästängsflotten, vändplan	60.4791	14.3141		2005-05-24	0	0	Skog, Uno (Genom)	Artport	Global Biodiversity Information Facility		Genom Länsstyrelsen Dalarnas län
Osmia uncinata Gerstäcker, 1869	Sweden		Haverland	58.4381	15.4769		2009-04-28	0	1	Karlsson, Tommy ; Antonsson, Kjell	Artport	Global Biodiversity Information Facility		Tommy Karlsson, Kjell Antonsson
Osmia uncinata Gerstäcker, 1869	Sweden		Heby grustäkt, Täktbotten	59.9618	16.8589		2008-05-30	0	1	Sjödin, Erik	Artport	Global Biodiversity Information Facility		Sjödin, Erik
Osmia uncinata Gerstäcker, 1869	Sweden		Hedesunda	60.4337	16.971		2009-04-20	2	0	Stenmark, Magnus	Egen	Global Biodiversity Information Facility		Magnus Larsson
Osmia uncinata Gerstäcker, 1869	Sweden		Hennan	62.0218	15.9024		2012-05-23	0	1	Stenmark, Magnus	Artport	Global Biodiversity Information Facility		Stenmark, Magnus
Osmia uncinata Gerstäcker, 1869	Sweden		Hertered	56.7308	13.0661		2009-05-23	0	1	Larsson, Krister	Egen	Global Biodiversity Information Facility		Larsson, Krister
Osmia uncinata Gerstäcker, 1869	Sweden		Hille	60.7264	17.1732		1948-07-01	0	1	Fahlander, Kjell Teodor	Swedish Museum of Natural History (NRM)	Global Biodiversity Information Facility		Fahlander, Kjell Teodor (1908-1964)
Osmia uncinata Gerstäcker, 1869	Sweden		Hjortsberga, Mölnbo	59.031	17.3822		1981-05-09	1	0	Norén, Lars	Egen	Global Biodiversity Information Facility		Norén, Lars
Osmia uncinata Gerstäcker, 1869	Sweden		Högalund, 300m V	56.6503	16.5923		2011-05-14	0	1	Nilsson, Johan	Egen	Global Biodiversity Information Facility		Nilsson, Johan
Osmia uncinata Gerstäcker, 1869	Sweden		Högbyhatt, Nåsten	59.8192	17.5659		2009-07-03	0	1	Cederberg, Björn	Egen	Global Biodiversity Information Facility		Cederberg, Björn
Osmia uncinata Gerstäcker, 1869	Sweden		Horla (07C6D)	57.9713	12.7367		2015-06-03	1	1	Stenmark, Magnus ; Segerlind, Daniel ; Stenström, Anna	Artport	Global Biodiversity Information Facility		Magnus Stenmark, Anna Stenström, Daniel Segerlind
Osmia uncinata Gerstäcker, 1869	Sweden		Horla (07C6D)	57.9713	12.7367		2015-07-13	0	0		Artport	Global Biodiversity Information Facility		Magnus Stenmark, Anna Stenström, Daniel Segerlind
Osmia uncinata Gerstäcker, 1869	Sweden		Hornslandet	61.6997	17.45		2010-06-01	1	0	Johansson, Niklas	Artport	Global Biodiversity Information Facility		Johansson, Niklas
Osmia uncinata Gerstäcker, 1869	Sweden		Hornsö	57.0005	16.1223		2011-06-01	1	0	Johansson, Niklas	Artport	Global Biodiversity Information Facility		Johansson, Niklas
Osmia uncinata Gerstäcker, 1869	Sweden		Ideboås NR	57.0405	15.6767		2007-06-05	0	1	Ivarsson, Tobias	Egen	Global Biodiversity Information Facility		Tobias Ivarsson
Osmia uncinata Gerstäcker, 1869	Sweden		Jädraås	60.8421	16.4682		1978-05-23	1	0	Svensson, Bo G.	Artport	Global Biodiversity Information Facility		Svensson, Bo G.
Osmia uncinata Gerstäcker, 1869	Sweden		Järna gård, Stjärnhov	59.1346	16.9153		1994-06-27	0	1	Norén, Lars	Egen	Global Biodiversity Information Facility		Norén, Lars
Osmia uncinata Gerstäcker, 1869	Sweden		Kallinge flygplats N delen	56.2826	15.2686		2007-05-27	0	1	Franzen, Markus	Artport	Global Biodiversity Information Facility		Franzen, Markus
Osmia uncinata Gerstäcker, 1869	Sweden		Kårberg 7950/0550	58.9604	14.9458		2007-05-04	0	1	Hallin, Gunnar	Egen	Global Biodiversity Information Facility		Hallin, Gunnar
Osmia uncinata Gerstäcker, 1869	Sweden		Kårberg 7950/0550	58.9604	14.9458		2007-05-06	0	1	Hallin, Gunnar	Egen	Global Biodiversity Information Facility		Hallin, Gunnar
Osmia uncinata Gerstäcker, 1869	Sweden		Karlberg torpruin, V om Torstunavägen (S1)	59.6775	17.0982		2011-04-29	1	0	Weibull, Henrik	Artport	Global Biodiversity Information Facility		Weibull, Henrik
Osmia uncinata Gerstäcker, 1869	Sweden		Karstorp 0850/4150	58.8971	15.0098		2011-05-08	0	1	Hallin, Gunnar	Egen	Global Biodiversity Information Facility		Hallin, Gunnar
Osmia uncinata Gerstäcker, 1869	Sweden		Kassmyra 3950/6350	59.0149	15.0454		2007-06-05	0	1	Hallin, Gunnar	Egen	Global Biodiversity Information Facility		Hallin, Gunnar
Osmia uncinata Gerstäcker, 1869	Sweden		Klockarefallet 7250/2250	58.9553	15.1492		1975-07-06	0	1	Hallin, Gunnar	Egen	Global Biodiversity Information Facility		Hallin, Gunnar
Osmia uncinata Gerstäcker, 1869	Sweden		Korsberga	57.3032	15.1259		1930-06-01	0	1	Gaunitz, Daniel V. M.	Lund	Global Biodiversity Information Facility		Gaunitz, Daniel V. M. (1894-1955)
Osmia uncinata Gerstäcker, 1869	Sweden		Korsberga	57.3068	15.1226		1940-01-01	0	1	Gaunitz, Carl Bertil	Swedish Museum of Natural History (NRM)	Global Biodiversity Information Facility		Gaunitz, Carl Bertil (1895-1969)
Osmia uncinata Gerstäcker, 1869	Sweden		Korsberga Skäftesfall	57.2766	15.1845		1935-08-01	0	1	Gaunitz, Daniel V. M.	Lund	Global Biodiversity Information Facility		Gaunitz, Daniel V. M. (1894-1955)
Osmia uncinata Gerstäcker, 1869	Sweden		Korsberga, Sandliden (Hult)	57.3346	15.1104		1927-07-29	0	1	Gaunitz, Daniel V. M.	Lund	Global Biodiversity Information Facility		Gaunitz, Daniel V. M. (1894-1955)
Osmia uncinata Gerstäcker, 1869	Sweden		Kråkekull 9850/4850	56.2822	14.7534		2009-06-14	0	1	Hallin, Gunnar	Egen	Global Biodiversity Information Facility		Hallin, Gunnar
Osmia uncinata Gerstäcker, 1869	Sweden		Krigstorp 8750/1850	58.9678	14.9682		1981-05-09	0	1	Hallin, Gunnar	Egen	Global Biodiversity Information Facility		Hallin, Gunnar
Osmia uncinata Gerstäcker, 1869	Sweden		Krokbäckskärret, Krokek	58.6802	16.3664		2005-06-24	0	1	Norén, Lars	Artport	Global Biodiversity Information Facility		Norén, Lars
Osmia uncinata Gerstäcker, 1869	Sweden		Krokbäckskärret, Krokek	58.6802	16.3664		2005-07-04	0	1	Norén, Lars	Artport	Global Biodiversity Information Facility		Norén, Lars
Osmia uncinata Gerstäcker, 1869	Sweden		Kull 3050/6150	59.0068	15.0421		2001-07-02	0	1	Hallin, Gunnar	Egen	Global Biodiversity Information Facility		Hallin, Gunnar
Osmia uncinata Gerstäcker, 1869	Sweden		Kulturens Östarp	55.6075	13.5578		2015-06-09	0	0	Larsson, Krister	Artport	Global Biodiversity Information Facility		Larsson, Krister
Osmia uncinata Gerstäcker, 1869	Sweden		Kungsgården	60.6023	16.621		2010-05-17	0	1	Stenmark, Magnus	Artport	Global Biodiversity Information Facility		Stenmark, Magnus
Osmia uncinata Gerstäcker, 1869	Sweden		Kvigärde, Gnesta	59.0404	17.3478		1980-06-05	0	1	Norén, Lars	Egen	Global Biodiversity Information Facility		Norén, Lars
Osmia uncinata Gerstäcker, 1869	Sweden		Kyrkan, SO 1250 m	58.9495	15.0728		2009-05-31	0	1	Hallin, Gunnar	Artport	Global Biodiversity Information Facility		Hallin, Gunnar
Osmia uncinata Gerstäcker, 1869	Sweden		L Ässböle f d 7250/8050	58.9558	15.25		2009-06-27	0	1	Hallin, Gunnar	Egen	Global Biodiversity Information Facility		Hallin, Gunnar
Osmia uncinata Gerstäcker, 1869	Sweden		L Emma 7150/7450	58.8658	15.4143		2007-04-26	1	0	Hallin, Gunnar	Egen	Global Biodiversity Information Facility		Hallin, Gunnar
Osmia uncinata Gerstäcker, 1869	Sweden		Leonardsberg, Grums	59.3693	13.1108		2008-05-31	0	0		Artport	Global Biodiversity Information Facility		Mikael Tuneld
Osmia uncinata Gerstäcker, 1869	Sweden		lindbyöst	56.8253	16.7177		2008-06-15	0	1	Stenmark, Magnus	Artport	Global Biodiversity Information Facility		Stenmark, Magnus
Osmia uncinata Gerstäcker, 1869	Sweden		Lindormsnäs	59.4955	17.5663		2006-04-01	0	1	Bergsten, Jan	Artport	Global Biodiversity Information Facility		Bergsten, Jan
Osmia uncinata Gerstäcker, 1869	Sweden		Löttorp, Horns Kungsgård, Borgholm	57.1859	16.939		1983-06-20	0	1	Norén, Lars	Egen	Global Biodiversity Information Facility		Norén, Lars
Osmia uncinata Gerstäcker, 1869	Sweden		Lövsta, Ö. Ängskär	60.4828	18.0597		1935-06-05	0	1	Hedgren, Gustaf Wilhelm	Swedish Museum of Natural History (NRM)	Global Biodiversity Information Facility		Hedgren, Gustaf Wilhelm (1894-1942)
Osmia uncinata Gerstäcker, 1869	Sweden		Luckebo 0050/4250	58.9797	15.0096		2009-06-27	0	1	Hallin, Gunnar	Egen	Global Biodiversity Information Facility		Hallin, Gunnar
Osmia uncinata Gerstäcker, 1869	Sweden		Luckebo 9950/4250	58.9788	15.0097		1977-06-15	1	0	Hallin, Gunnar	Egen	Global Biodiversity Information Facility		Hallin, Gunnar
Osmia uncinata Gerstäcker, 1869	Sweden		Lunnarna	56.7533	13.3384		2014-06-19	0	1	Bengtsson, Staffan	Artport	Global Biodiversity Information Facility		Bengtsson, Staffan
Osmia uncinata Gerstäcker, 1869	Sweden		Marby	58.6052	16.2949		1977-05-19	1	0	Svensson, Bo G.	Artport	Global Biodiversity Information Facility		Svensson, Bo G.
Osmia uncinata Gerstäcker, 1869	Sweden		Messaure	66.6795	20.3666		1973-07-02	0	1	Müller, Karl	Annan	Global Biodiversity Information Facility		Müller, Karl (1919-2005)
Osmia uncinata Gerstäcker, 1869	Sweden		Mjösingsmåla	56.9534	16.0952		2014-04-25	0	0	Björn, Stefan ; Johansson, Niklas	Artport	Global Biodiversity Information Facility		Björn, Stefan ; Johansson, Niklas
Osmia uncinata Gerstäcker, 1869	Sweden		Mohed O	61.2898	16.8526		2012-05-08	1	1	Stenmark, Magnus	Artport	Global Biodiversity Information Facility		Stenmark, Magnus
Osmia uncinata Gerstäcker, 1869	Sweden		Mohed V	61.293	16.8428		2012-05-08	0	1	Stenmark, Magnus	Artport	Global Biodiversity Information Facility		Stenmark, Magnus
Osmia uncinata Gerstäcker, 1869	Sweden		Mölleryd	56.2557	15.3933		2007-06-11	0	1	Franzen, Markus	Artport	Global Biodiversity Information Facility		Franzen, Markus
Osmia uncinata Gerstäcker, 1869	Sweden		Mölnbacka, Fördarverbacken	59.6605	13.5528		2011-05-07	0	1	Mangsbo, Dan	Artport	Global Biodiversity Information Facility		Mangsbo, Dan
Osmia uncinata Gerstäcker, 1869	Sweden		Mora gård, Dunker	59.1886	16.8996		1998-07-27	0	1	Norén, Lars	Egen	Global Biodiversity Information Facility		Norén, Lars
Osmia uncinata Gerstäcker, 1869	Sweden		Mörlunda Lillesjö	57.3327	15.8818		2009-04-24	1	0	Johansson, Niklas	Artport	Global Biodiversity Information Facility		Johansson, Niklas
Osmia uncinata Gerstäcker, 1869	Sweden		Mortorp/Gum-Waldlichtung	56.5667	16.0169		1993-05-07	15	0	Flügel, Hans Joachim	Flügel, Hans Joachim	Flügel, Hans Joachim (personal communication)		Flügel, Hans Joachim
Osmia uncinata Gerstäcker, 1869	Sweden		Mosshult	58.8461	14.6254		2008-07-01	0	1	Stenmark, Magnus	Egen	Global Biodiversity Information Facility		Magnus Larsson
Osmia uncinata Gerstäcker, 1869	Sweden		N Kvie, Lojsta	57.5235	18.4018		1998-07-09	0	1	Norén, Lars	Egen	Global Biodiversity Information Facility		Norén, Lars
Osmia uncinata Gerstäcker, 1869	Sweden		N Nyckelhult 9950/1750	58.9795	15.1401		1996-06-24	0	1	Hallin, Gunnar	Egen	Global Biodiversity Information Facility		Hallin, Gunnar
Osmia uncinata Gerstäcker, 1869	Sweden		N:a Ulvön: Sandviken	63.0697	18.6899		2010-08-02	0	0		Egen	Global Biodiversity Information Facility		Sven Hellqvist
Osmia uncinata Gerstäcker, 1869	Sweden		N:a Ulvön: Sandviken	63.0697	18.6899		2010-08-07	0	1	Hellqvist, Sven	Egen	Global Biodiversity Information Facility		Hellqvist, Sven
Osmia uncinata Gerstäcker, 1869	Sweden		Nässjö: nipsippsreservatet	63.5843	16.3447		2011-06-29	0	1	Hellqvist, Sven	Egen	Global Biodiversity Information Facility		Hellqvist, Sven
Osmia uncinata Gerstäcker, 1869	Sweden		Nedre Holmtorp 5350/1950	59.0288	15.3167		1989-06-13	0	1	Hallin, Gunnar	Egen	Global Biodiversity Information Facility		Hallin, Gunnar
Osmia uncinata Gerstäcker, 1869	Sweden		NO Gunnarsbo, Delsbo	61.8847	16.3099		1981-06-26	0	2	Norén, Lars	Egen	Global Biodiversity Information Facility		Norén, Lars
Osmia uncinata Gerstäcker, 1869	Sweden		Nottebäck, Klavreström, St. Heda (Huda)	57.1359	15.1431		1937-05-24	0	1	Gaunitz, Carl Bertil	Lund	Global Biodiversity Information Facility		Gaunitz, Carl Bertil (1895-1969)
Osmia uncinata Gerstäcker, 1869	Sweden		Nyårsåsen F2	56.7322	12.8085		2014-06-09	1	0	Hall, Krister ; Larsson, Krister ; Persson, Kill	Artport	Global Biodiversity Information Facility		Hall, Krister ; Larsson, Krister ; Persson, Kill
Osmia uncinata Gerstäcker, 1869	Sweden		Nye, Bladekullatrakten (Bladshultstrakten), Skärpan	57.3334	15.2399		1932-07-12	0	1	Gaunitz, Daniel V. M.	Lund	Global Biodiversity Information Facility		Gaunitz, Daniel V. M. (1894-1955)
Osmia uncinata Gerstäcker, 1869	Sweden		Nytorp, Haninge	59.1369	18.1035		1985-06-18	1	0	Norén, Lars	Egen	Global Biodiversity Information Facility		Norén, Lars
Osmia uncinata Gerstäcker, 1869	Sweden		Nytorp, Haninge	59.1369	18.1035		1987-07-02	0	1	Norén, Lars	Egen	Global Biodiversity Information Facility		Norén, Lars
Osmia uncinata Gerstäcker, 1869	Sweden		O Brunnshed	59.869	14.8532		2008-04-21	1	1	Stenmark, Magnus	Egen	Global Biodiversity Information Facility		Magnus Larsson
Osmia uncinata Gerstäcker, 1869	Sweden		Öjavad 8850/5350	56.2733	14.7617		1994-06-11	1	0	Hallin, Gunnar	Egen	Global Biodiversity Information Facility		Hallin, Gunnar
Osmia uncinata Gerstäcker, 1869	Sweden		Önnabo 9950/9150	58.8895	15.0967		1979-07-07	0	1	Hallin, Gunnar	Egen	Global Biodiversity Information Facility		Hallin, Gunnar
Osmia uncinata Gerstäcker, 1869	Sweden		Örberga 9650/5150	58.9762	15.0254		1975-07-03	0	1	Hallin, Gunnar	Egen	Global Biodiversity Information Facility		Hallin, Gunnar
Osmia uncinata Gerstäcker, 1869	Sweden		Örberga 9650/5350	58.9762	15.0288		1968-06-18	0	1	Hallin, Gunnar	Egen	Global Biodiversity Information Facility		Hallin, Gunnar
Osmia uncinata Gerstäcker, 1869	Sweden		Österhaninge, Sandemar grustag	59.1407	18.3834		1997-07-01	0	1	Abenius, Johan	Egen	Global Biodiversity Information Facility		Abenius, Johan
Osmia uncinata Gerstäcker, 1869	Sweden		Österkärv, Gnesta	59.041	17.2956		1982-06-26	0	1	Norén, Lars	Egen	Global Biodiversity Information Facility		Norén, Lars
Osmia uncinata Gerstäcker, 1869	Sweden		Othem syd	57.7454	18.6941		2008-04-01	0	1	Bergsten, Jan	Artport	Global Biodiversity Information Facility		Bergsten, Jan, Länsstyrelsen Gotland (ok)
Osmia uncinata Gerstäcker, 1869	Sweden		Persö	57.6437	14.9305		2006-01-01	2	0	Johansson, Niklas	Artport	Global Biodiversity Information Facility		Johansson, Niklas
Osmia uncinata Gerstäcker, 1869	Sweden		Pinnarp/Blåsmålen	57.3235	15.4964		2006-01-01	0	1	Karlsson, Roger	Artport	Global Biodiversity Information Facility		Karlsson, Roger
Osmia uncinata Gerstäcker, 1869	Sweden		Repperda Åryd	57.3991	15.3474		2010-06-06	2	2	Johansson, Niklas	Egen	Global Biodiversity Information Facility		Johansson, Niklas
Osmia uncinata Gerstäcker, 1869	Sweden		Repperda Åryd	57.3991	15.3474		2011-04-21	1	0	Johansson, Niklas	Artport	Global Biodiversity Information Facility		Johansson, Niklas
Osmia uncinata Gerstäcker, 1869	Sweden		Ringsjön	55.8753	13.499		1907-06-12	0	1	Ringdahl, Oskar	Swedish Museum of Natural History (NRM)	Global Biodiversity Information Facility		Oskar Ringdahl (1885-1966)
Osmia uncinata Gerstäcker, 1869	Sweden		Rödåsen	62.8081	18.202		2006-06-09	0	1	Olofsson, Frans	Egen	Global Biodiversity Information Facility		Sofia Larsson
Osmia uncinata Gerstäcker, 1869	Sweden		Romme_landningsbana	60.4164	15.5261		2008-04-09	0	1	Stenmark, Magnus	Artport	Global Biodiversity Information Facility		Magnus Larsson
Osmia uncinata Gerstäcker, 1869	Sweden		Rönnestorp 5350/5550	58.9377	15.0332		2007-06-05	0	1	Hallin, Gunnar	Egen	Global Biodiversity Information Facility		Hallin, Gunnar
Osmia uncinata Gerstäcker, 1869	Sweden		Rotliden	65.2226	20.2967		2005-06-10	0	1	Pettersson, Roger Mugerwa	Artport	Global Biodiversity Information Facility		Pettersson,Roger ; Hellqvist, Sven
Osmia uncinata Gerstäcker, 1869	Sweden		Rungarn	59.979	18.2673		1969-05-15	1	0	Erlandsson, Stellan O.	Swedish Museum of Natural History (NRM)	Global Biodiversity Information Facility		Erlandsson, Stellan O.
Osmia uncinata Gerstäcker, 1869	Sweden		S Ässböle 6550/8150	58.9495	15.2518		2006-07-04	0	1	Hallin, Gunnar	Egen	Global Biodiversity Information Facility		Hallin, Gunnar
Osmia uncinata Gerstäcker, 1869	Sweden		S. Stugsjön	61.5681	15.697		1997-06-23	0	3	Henriksson, Bo	Artport	Global Biodiversity Information Facility		Henriksson, Bo
Osmia uncinata Gerstäcker, 1869	Sweden		Sandarne	61.2649	17.1482		2012-06-20	0	1	Stenmark, Magnus	Artport	Global Biodiversity Information Facility		Stenmark, Magnus
Osmia uncinata Gerstäcker, 1869	Sweden		Sandbäck, 300 m NV	57.9216	15.5054		2010-05-18	1	0	Karlsson, Tommy	Artport	Global Biodiversity Information Facility		Tommy Karlsson
Osmia uncinata Gerstäcker, 1869	Sweden		Sasnekape	66.4767	19.7796		2006-07-10	0	1	Hellqvist, Sven (Genom)	Artport	Global Biodiversity Information Facility		Sven Hellqvist
Osmia uncinata Gerstäcker, 1869	Sweden		Segeltorp, Huddinge	59.2771	17.9427		1959-04-29	0	1	Bryant-Meissner, Rudolf	Swedish Museum of Natural History (NRM)	Global Biodiversity Information Facility		Bryant-Meissner, Rudolf
Osmia uncinata Gerstäcker, 1869	Sweden		Simonstorp	58.7815	16.1623		1926-07-06	0	1	Wängsjö, Gustav	Swedish Museum of Natural History (NRM)	Global Biodiversity Information Facility		Wängsjö, Gustav (1909-1985)
Osmia uncinata Gerstäcker, 1869	Sweden		Simpnäs, Malaises udde	59.8853	19.0635		1996-05-31	1	0	Bartsch, Hans	Egen	Global Biodiversity Information Facility		Bartsch, Hans
Osmia uncinata Gerstäcker, 1869	Sweden		Sjuenda, Gnesta	59.0852	17.3498		1975-06-18	0	1	Norén, Lars	Egen	Global Biodiversity Information Facility		Norén, Lars
Osmia uncinata Gerstäcker, 1869	Sweden		Sjuenda, Gnesta	59.0852	17.3498		1980-06-07	0	1	Norén, Lars	Egen	Global Biodiversity Information Facility		Norén, Lars
Osmia uncinata Gerstäcker, 1869	Sweden		Skälboö	58.3771	16.41		2013-06-20	0	1	Holmström, Göran	Artport	Global Biodiversity Information Facility		Holmström, Göran
Osmia uncinata Gerstäcker, 1869	Sweden		Skåle 1950/6050	58.9979	15.2145		1972-07-15	0	2	Hallin, Gunnar	Egen	Global Biodiversity Information Facility		Hallin, Gunnar
Osmia uncinata Gerstäcker, 1869	Sweden		Skäret, Stegsholm	59.1064	18.2388		2013-06-08	0	1	Nilsson, Johan	Egen	Global Biodiversity Information Facility		Nilsson, Johan
Osmia uncinata Gerstäcker, 1869	Sweden		Skepphult 3150/2150	58.8288	15.1499		1973-07-01	0	1	Hallin, Gunnar	Egen	Global Biodiversity Information Facility		Hallin, Gunnar
Osmia uncinata Gerstäcker, 1869	Sweden		Skinnskälla	57.3905	15.5129		2007-05-03	0	1	Johansson, Niklas	Artport	Global Biodiversity Information Facility		Johansson, Niklas
Osmia uncinata Gerstäcker, 1869	Sweden		Skoga, S. , Skallberget	60.0429	13.4048		1973-01-01	0	1	Persson, Marit (Genom)	Swedish Museum of Natural History (NRM)	Global Biodiversity Information Facility		Genom Artdatabanken (MP) SLU
Osmia uncinata Gerstäcker, 1869	Sweden		Skräddartorp 1:28	59.665	14.4886		2008-04-19	0	1	Stenmark, Magnus	Egen	Global Biodiversity Information Facility		Magnus Larsson
Osmia uncinata Gerstäcker, 1869	Sweden		Slapperhult	57.6398	12.3405		2009-05-31	0	1	Karlsson, Åke	Artport	Global Biodiversity Information Facility		Karlsson, Åke
Osmia uncinata Gerstäcker, 1869	Sweden		Slinderstugan, Vagnhärad	58.9855	17.4323		1998-06-08	0	1	Norén, Lars	Egen	Global Biodiversity Information Facility		Norén, Lars
Osmia uncinata Gerstäcker, 1869	Sweden		Snokebo-Gröndal,Rain	57.7189	15.9114		2001-07-09	0	21	Flügel, Hans Joachim	Flügel, Hans Joachim	Flügel, Hans Joachim (personal communication)		Flügel, Hans Joachim
Osmia uncinata Gerstäcker, 1869	Sweden		Södra Duveled	57.4766	14.0891		2010-06-03	0	1	Johansson, Niklas	Artport	Global Biodiversity Information Facility		Johansson, Niklas
Osmia uncinata Gerstäcker, 1869	Sweden		Sörfors: Görjmyran	63.8448	20.0306		2006-06-11	0	1	Hellqvist, Sven	Egen	Global Biodiversity Information Facility		Hellqvist, Sven
Osmia uncinata Gerstäcker, 1869	Sweden		Sorunda, Fullbro malm	59.0842	17.7832		2011-05-19	1	0	Abenius, Johan	Egen	Global Biodiversity Information Facility		Abenius, Johan
Osmia uncinata Gerstäcker, 1869	Sweden		Sorunda, NE Tärnan	59.0435	17.9365		2011-05-01	2	0	Abenius, Johan	Egen	Global Biodiversity Information Facility		Abenius, Johan
Osmia uncinata Gerstäcker, 1869	Sweden		Spånbron f d 5650/7150	58.9405	15.0609		1992-05-29	0	1	Hallin, Gunnar	Egen	Global Biodiversity Information Facility		Hallin, Gunnar
Osmia uncinata Gerstäcker, 1869	Sweden		Stora Stjärnemo	56.7569	16.0778		2014-04-25	0	0	Björn, Stefan ; Johansson, Niklas	Artport	Global Biodiversity Information Facility		Björn, Stefan ; Johansson, Niklas
Osmia uncinata Gerstäcker, 1869	Sweden		Stornorrfors kraftstation	63.8557	20.046		2012-06-15	0	1	Hellqvist, Sven	Egen	Global Biodiversity Information Facility		Hellqvist, Sven
Osmia uncinata Gerstäcker, 1869	Sweden		Strömbäck: vid folkhögskolan	63.69	20.2278		2009-05-17	1	1	Hellqvist, Sven	Egen	Global Biodiversity Information Facility		Hellqvist, Sven
Osmia uncinata Gerstäcker, 1869	Sweden		Susekull 2750/3850	56.3081	14.7365		2005-06-19	0	1	Hallin, Gunnar	Egen	Global Biodiversity Information Facility		Hallin, Gunnar
Osmia uncinata Gerstäcker, 1869	Sweden		SV Ullaberg, Stjärnhov	59.0347	17.034		1994-07-03	1	0	Norén, Lars	Egen	Global Biodiversity Information Facility		Norén, Lars
Osmia uncinata Gerstäcker, 1869	Sweden		Svartslakttäkten	57.2862	16.9928		2008-04-13	1	0	Lager, Helena (Genom)	Egen	Global Biodiversity Information Facility		Genom Länsstyrelsen Kalmar
Osmia uncinata Gerstäcker, 1869	Sweden		Syd Gröen, berget.	57.6742	12.1918		2008-06-01	1	0	Karlsson, Åke	Artport	Global Biodiversity Information Facility		Karlsson, Åke
Osmia uncinata Gerstäcker, 1869	Sweden		Tegelhagsskogen, parken	59.407	17.9889		2010-05-14	1	0	Nilsson, Johan	Egen	Global Biodiversity Information Facility		Nilsson, Johan
Osmia uncinata Gerstäcker, 1869	Sweden		Tengene (Tångene)	58.3081	12.6685		1956-07-01	0	1	Persson, Marit (Genom)	Swedish Museum of Natural History (NRM)	Global Biodiversity Information Facility		Genom Artdatabanken (MP) SLU
Osmia uncinata Gerstäcker, 1869	Sweden		Tinnerö 8	58.3699	15.6123		2012-04-17	0	1	Andersson, Håkan	Artport	Global Biodiversity Information Facility		Andersson, Håkan
Osmia uncinata Gerstäcker, 1869	Sweden		Tinnerö eklandskap, Humpen	58.3801	15.6122		2014-05-16	0	1	Ivarsson, Tobias	Artport	Global Biodiversity Information Facility		Tobias Ivarsson
Osmia uncinata Gerstäcker, 1869	Sweden		Tofta liten sandgrop	57.5295	18.1546		2008-04-01	0	2	Bergsten, Jan	Artport	Global Biodiversity Information Facility		Bergsten, Jan, Länsstyrelsen Gotland (ok)
Osmia uncinata Gerstäcker, 1869	Sweden		Tollby större	57.6322	18.5589		2008-04-01	0	1	Bergsten, Jan	Artport	Global Biodiversity Information Facility		Bergsten, Jan, Länsstyrelsen Gotland (ok)
Osmia uncinata Gerstäcker, 1869	Sweden		Tönnersjömålet, Stridsvagnshöjden	56.6739	13.2574		2014-05-26	0	1	Larsson, Krister ; Alness, Lena ; Erlandsson, Jeanette ; Bergquist, Sara ; Björklund, Jan-Olov ; Hall, Krister ; Mathiasson, Monica ; Svensson, Ingegerd ; Nystrand, Magnus	Artport	Global Biodiversity Information Facility		Larsson, Krister ; Bergquist, Sara ; Hall, Krister ; Mathiasson, Monica ; Alness, Lena ; Nystrand, Magnus , Ing
Osmia uncinata Gerstäcker, 1869	Sweden		Träkumla ind. täkt	57.5911	18.2992		2008-04-01	0	1	Bergsten, Jan	Artport	Global Biodiversity Information Facility		Bergsten, Jan, Länsstyrelsen Gotland (ok)
Osmia uncinata Gerstäcker, 1869	Sweden		Tranören 5	58.3772	14.8499		2008-05-05	0	1	Andersson, Håkan	Artport	Global Biodiversity Information Facility		Andersson, Håkan
Osmia uncinata Gerstäcker, 1869	Sweden		Trollskogen, Grankulla	57.3457	17.1266		1990-05-29	0	1	Norén, Lars	Egen	Global Biodiversity Information Facility		Norén, Lars
Osmia uncinata Gerstäcker, 1869	Sweden		Tureholm, Skå	59.3136	17.729		1951-06-17	1	0	Persson, Marit (Genom)	Swedish Museum of Natural History (NRM)	Global Biodiversity Information Facility		Genom Artdatabanken (MP) SLU
Osmia uncinata Gerstäcker, 1869	Sweden		Turinge	59.1954	17.4423		1953-06-14	0	1	Erlandsson, Stellan O.	Swedish Museum of Natural History (NRM)	Global Biodiversity Information Facility		Erlandsson, Stellan O.
Osmia uncinata Gerstäcker, 1869	Sweden		Tvärskog	56.6264	16.0233		2013-05-01	0	0	Johansson, Niklas	Egen	Global Biodiversity Information Facility		Johansson, Niklas
Osmia uncinata Gerstäcker, 1869	Sweden		Tvätärnarna 0550/2350	58.985	15.1504		1996-06-24	0	1	Hallin, Gunnar	Egen	Global Biodiversity Information Facility		Hallin, Gunnar
Osmia uncinata Gerstäcker, 1869	Sweden		Tycke 2050/7750	58.9969	14.8961		2003-07-11	0	1	Hallin, Gunnar	Egen	Global Biodiversity Information Facility		Hallin, Gunnar
Osmia uncinata Gerstäcker, 1869	Sweden		Tyresö, Brevik	59.2152	18.382		1932-07-08	0	1	Selander, Sten	Swedish Museum of Natural History (NRM)	Global Biodiversity Information Facility		Sten Selander (1891-1957)
Osmia uncinata Gerstäcker, 1869	Sweden		Udden, Ölsdalen	59.2404	14.5284		2012-06-16	1	0	Holmström, Göran	Artport	Global Biodiversity Information Facility		Holmström, Göran
Osmia uncinata Gerstäcker, 1869	Sweden		Uppsala	59.8491	17.6402		1901-05-10	1	0		Swedish Museum of Natural History (NRM)	Global Biodiversity Information Facility		Per Abraham Roman (1872-1943)
Osmia uncinata Gerstäcker, 1869	Sweden		Utö: Rävstavik, Haninge	58.962	18.3352		1989-06-09	0	1	Norén, Lars	Egen	Global Biodiversity Information Facility		Norén, Lars
Osmia uncinata Gerstäcker, 1869	Sweden		Vagersta 8950/3750	58.8788	14.8299		1975-07-09	0	1	Hallin, Gunnar	Egen	Global Biodiversity Information Facility		Hallin, Gunnar
Osmia uncinata Gerstäcker, 1869	Sweden		Vajmat	66.5058	19.6942		2009-08-09	0	1	Hellqvist, Sven (Genom)	Artport	Global Biodiversity Information Facility		Sven Hellqvist
Osmia uncinata Gerstäcker, 1869	Sweden		Valbo-Ryr	58.4928	11.8145		1951-07-31	0	1	Erlandsson, Stellan O.	Swedish Museum of Natural History (NRM)	Global Biodiversity Information Facility		Erlandsson, Stellan O.
Osmia uncinata Gerstäcker, 1869	Sweden		Vallentuna	59.5317	18.0737		1981-07-13	0	1	Hedquist (hequist), Karl Johan	Swedish Museum of Natural History (NRM)	Global Biodiversity Information Facility		Hedquist (hequist), Karl Johan
Osmia uncinata Gerstäcker, 1869	Sweden		Valsjöheden	59.6753	15.4885		2008-04-23	1	1	Stenmark, Magnus	Egen	Global Biodiversity Information Facility		Magnus Larsson
Osmia uncinata Gerstäcker, 1869	Sweden		Vansö skjutfält, Grusåsen	59.4105	16.9754		2013-05-25	1	0	Abenius, Johan	Egen	Global Biodiversity Information Facility		Abenius, Johan
Osmia uncinata Gerstäcker, 1869	Sweden		Vårdinge k:a, Gnesta	59.0312	17.3648		1981-05-19	0	2	Norén, Lars	Egen	Global Biodiversity Information Facility		Norén, Lars
Osmia uncinata Gerstäcker, 1869	Sweden		Vassunda	59.7042	17.73		1900-01-01	1	0	Lundblad, Olov	Swedish Museum of Natural History (NRM)	Global Biodiversity Information Facility		Lundblad, Olov (1890-1970)
Osmia uncinata Gerstäcker, 1869	Sweden		Västeräng, Nacka	59.2606	18.217		1984-06-05	0	2	Norén, Lars	Egen	Global Biodiversity Information Facility		Norén, Lars
Osmia uncinata Gerstäcker, 1869	Sweden		Västerhejde ind. täkt	57.6629	18.2588		2008-04-01	0	2	Bergsten, Jan	Artport	Global Biodiversity Information Facility		Bergsten, Jan, Länsstyrelsen Gotland (ok)
Osmia uncinata Gerstäcker, 1869	Sweden		Vessingesjön	56.5485	13.0845		2013-05-07	1	0	Bengtsson, Staffan	Artport	Global Biodiversity Information Facility		Bengtsson, Staffan
Osmia uncinata Gerstäcker, 1869	Sweden		Vessingesjön V	56.548	13.0827		2012-05-03	1	0	Larsson, Krister	Artport	Global Biodiversity Information Facility		Larsson, Krister
Osmia uncinata Gerstäcker, 1869	Sweden		Vessingesjön V	56.548	13.0827		2015-06-06	1	0	Larsson, Krister	Artport	Global Biodiversity Information Facility		Larsson, Krister
Osmia uncinata Gerstäcker, 1869	Sweden		Vesslunda 2	56.838	12.5837		2002-05-11	1	0	Larsson, Krister ; Abenius Johan	Egen	Global Biodiversity Information Facility		Larsson, Krister ; Abenius Johan
Osmia uncinata Gerstäcker, 1869	Sweden		Vidstrandsnäs NV Granö	64.3123	19.1522		1995-07-15	0	1	Hellqvist, Sven	Egen	Global Biodiversity Information Facility		Hellqvist, Sven
Osmia uncinata Gerstäcker, 1869	Sweden		Vinäs NV	60.9721	14.5224		1980-05-05	1	0	Cederberg, Björn	Egen	Global Biodiversity Information Facility		Cederberg, Björn
Osmia uncinata Gerstäcker, 1869	Sweden		Virserum, Tinnsebo	57.2785	15.6626		2008-06-01	0	1	Stenmark, Magnus	Egen	Global Biodiversity Information Facility		Magnus Larsson
Osmia uncinata Gerstäcker, 1869	Sweden		Visbohammar, Gnesta	59.0495	17.3308		1983-06-14	0	1	Norén, Lars	Egen	Global Biodiversity Information Facility		Norén, Lars
Osmia uncinata Gerstäcker, 1869	Sweden		Vissboda 3150/6550	59.0078	15.049		1998-08-24	0	1	Hallin, Gunnar	Egen	Global Biodiversity Information Facility		Hallin, Gunnar
Osmia uncinata Gerstäcker, 1869	Sweden		Yttervalla, Gnesta	59.0591	17.2789		1982-07-20	0	2	Norén, Lars	Egen	Global Biodiversity Information Facility		Norén, Lars
Osmia uncinata Gerstäcker, 1869	Switzerland	Aargau	Bözen, Naturreservat Hessenberg	47.4988	8.0898	495	2012-06-02	0	1	Artmann-Graf, Georg	Artmann-Graf, Georg	Centre Suisse de Cartographie de la Faune		Artmann-Graf, Georg
Osmia uncinata Gerstäcker, 1869	Switzerland	Aargau	Erlinsbach, Wiese Stelliloch	47.4092	8.02245	465	2002-05-20	0	1	Artmann-Graf, Georg		Centre Suisse de Cartographie de la Faune		Artmann-Graf, Georg
Osmia uncinata Gerstäcker, 1869	Switzerland	Aargau	Oberehrendingen	47.479	8.35493		2013-05-06	0	0	Rey, André		Centre Suisse de Cartographie de la Faune		NEUMERA01
Osmia uncinata Gerstäcker, 1869	Switzerland	Appenzell Ausserrhoden	Gais, Gäbris	47.3749	9.4657	1142	2016-06-23	0	1	Martz, Holger	Praz, Christophe	Centre Suisse de Cartographie de la Faune		Martz, Holger
Osmia uncinata Gerstäcker, 1869	Switzerland	Basel	Diegten	47.4011	7.81038	545	2013-06-04	0	1	Schmid, Franziska		Centre Suisse de Cartographie de la Faune		SCHMIFR02
Osmia uncinata Gerstäcker, 1869	Switzerland	Basel	Diegten, Chilpen-Reservat, Waldlichtung nördlich des Südwesthanges	47.4101	7.81044	530	1991-06-24	0	1	Artmann-Graf, Georg	Artmann-Graf, Georg	Centre Suisse de Cartographie de la Faune		Artmann-Graf, Georg
Osmia uncinata Gerstäcker, 1869	Switzerland	Basel	Eptingen, Lauchweid Ost	47.3742	7.7837	950	2007-04-07	0	1	Artmann-Graf, Georg		Centre Suisse de Cartographie de la Faune		Artmann-Graf, Georg
Osmia uncinata Gerstäcker, 1869	Switzerland	Basel	Läufelfingen, Waldrand Ebnetholz (nordwestlich Muren)	47.383	7.84998	810	2005-04-02	1	0	Artmann-Graf, Georg	Artmann-Graf, Georg	Centre Suisse de Cartographie de la Faune		Artmann-Graf, Georg
Osmia uncinata Gerstäcker, 1869	Switzerland	Basel	Tenniken, Waldweg Stockenrain	47.4281	7.81056	540	2012-05-20	0	2	Artmann-Graf, Georg		Centre Suisse de Cartographie de la Faune		Artmann-Graf, Georg
Osmia uncinata Gerstäcker, 1869	Switzerland	Basel	Waldenburg, Will	47.3833	7.73079	650	1998-05-12	0	1	Amiet, Felix	Naturhistorischen Museum Bern (NMBE)	Centre Suisse de Cartographie de la Faune		Amiet, Felix
Osmia uncinata Gerstäcker, 1869	Switzerland	Bern	Attiswil, Schmidenmatt	47.2756	7.59802	1000	1986-06-20	0	1	Amiet, Felix	Amiet, Felix	Centre Suisse de Cartographie de la Faune		Amiet, Felix
Osmia uncinata Gerstäcker, 1869	Switzerland	Bern	Bern	46.9429	7.43943		1900-05-20	0	1	Steck-Hofmann, Theodor	Neues Museum Biel (NMB)	Centre Suisse de Cartographie de la Faune		Herrmann, Mike
Osmia uncinata Gerstäcker, 1869	Switzerland	Bern	Bern	46.9429	7.43943		10.05.1887	0	1	Steck-Hofmann, Theodor	Neues Museum Biel (NMB)	Centre Suisse de Cartographie de la Faune		Herrmann, Mike
Osmia uncinata Gerstäcker, 1869	Switzerland	Bern	Bern	46.9429	7.43943		23.04.1886	1	0	von Schulthess Rechberg (Schindler) Anton	Zoologisches Museum der Universität Zürich (ZMZ)	Centre Suisse de Cartographie de la Faune		NEUMERA01
Osmia uncinata Gerstäcker, 1869	Switzerland	Bern	Dotzigen	47.1138	7.36034	450	2003-04-29	0	2	Amiet, Felix	Naturhistorischen Museum Bern (NMBE)	Centre Suisse de Cartographie de la Faune		Amiet, Felix
Osmia uncinata Gerstäcker, 1869	Switzerland	Bern	Gadmen, W, Üsser/Inner Flüeligraben, Cholerschlagwald	46.7325	8.32919	1500	1991-06-16	0	1	Amiet, Felix	Amiet, Felix	Centre Suisse de Cartographie de la Faune		Amiet, Felix
Osmia uncinata Gerstäcker, 1869	Switzerland	Bern	Hilterfingen, Heiligenschwendi	46.7447	7.675	1150	1977-06-12	0	2	Amiet, Felix	Amiet, Felix	Centre Suisse de Cartographie de la Faune		Amiet, Felix
Osmia uncinata Gerstäcker, 1869	Switzerland	Bern	La Neuveville	47.0593	7.08396		04.07.1894	0	1	Jacob Baptiste Jacques	Musée cantonal de zoologie Lausanne (MZL)	Centre Suisse de Cartographie de la Faune		NEUMERA01
Osmia uncinata Gerstäcker, 1869	Switzerland	Bern	La Neuveville, Le Tirage	47.0593	7.08396		30.05.1899	0	1	Jacob Baptiste Jacques	Musée cantonal de zoologie Lausanne (MZL)	Centre Suisse de Cartographie de la Faune		NEUMERA01
Osmia uncinata Gerstäcker, 1869	Switzerland	Bern	Messen	47.0918	7.44749		2001-05-22	1	0			Straka, Jakub (personel communication)		Straka, Jakub
Osmia uncinata Gerstäcker, 1869	Switzerland	Bern	Muri bei Bern, Gümligen	46.9339	7.5051		1921-03-31	1	0	Steck-Hofmann, Theodor	Neues Museum Biel (NMB)	Centre Suisse de Cartographie de la Faune		Herrmann, Mike
Osmia uncinata Gerstäcker, 1869	Switzerland	Bern	Muri bei Bern, Gümligen	46.9339	7.5051		1934-06-09	0	1	Steck-Hofmann, Theodor	Naturhistorischen Museum Bern (NMBE)	Centre Suisse de Cartographie de la Faune		Amiet, Felix
Osmia uncinata Gerstäcker, 1869	Switzerland	Bern	Prêles	47.0954	7.12324			0	1	von Schulthess Rechberg (Schindler) Anton	Zoologisches Museum der Universität Zürich (ZMZ)	Centre Suisse de Cartographie de la Faune		NEUMERA01
Osmia uncinata Gerstäcker, 1869	Switzerland	Bern	Ringgenberg, Ried	46.6992	7.87095	1000	2000-05-25	0	1	Amiet, Felix	Naturhistorischen Museum Bern (NMBE)	Centre Suisse de Cartographie de la Faune		Amiet, Felix
Osmia uncinata Gerstäcker, 1869	Switzerland	Bern	Ringgenberg, Wannichnubel	46.6992	7.85788	1300	2003-06-19	0	2	Amiet, Felix	Naturhistorischen Museum Bern (NMBE)	Centre Suisse de Cartographie de la Faune		Amiet, Felix
Osmia uncinata Gerstäcker, 1869	Switzerland	Freiburg	Düdingen, Grüneburgacher	46.8796	7.19014	500	2017-05-23	0	1	Bur, Markus	Bur, Markus	Centre Suisse de Cartographie de la Faune		Bur, Markus
Osmia uncinata Gerstäcker, 1869	Switzerland	Freiburg	Estavayer, Forel	46.8695	6.87536		2015-04-20	1	0	Khadraoui, Mehdi	PRUN	Centre Suisse de Cartographie de la Faune		Khadraoui, Mehdi
Osmia uncinata Gerstäcker, 1869	Switzerland	Freiburg	Marly, La Gérine	46.7716	7.13827	580	1976-04-22	0	1	Bur, Markus	Bur, Markus	Centre Suisse de Cartographie de la Faune		Bur, Markus
Osmia uncinata Gerstäcker, 1869	Switzerland	Freiburg	Marly, La Gérine	46.7626	7.1645	630	1980-07-27	0	1	Bur, Markus	Bur, Markus	Centre Suisse de Cartographie de la Faune		Bur, Markus
Osmia uncinata Gerstäcker, 1869	Switzerland	Freiburg	Marly, La Gérine	46.7716	7.15136	597	2017-05-29	0	1	Bur, Markus	Bur, Markus	Centre Suisse de Cartographie de la Faune		Bur, Markus
Osmia uncinata Gerstäcker, 1869	Switzerland	Freiburg	Marly, Le Pâquier	46.7715	7.12518	600	2016-05-20	0	1	Evéquoz, Noémie	Praz, Christophe	Centre Suisse de Cartographie de la Faune		Evéquoz, Noémie
Osmia uncinata Gerstäcker, 1869	Switzerland	Freiburg	Marly, Vieille-Rossmatte	46.7627	7.17759	680	1978-04-09	1	0	Bur, Markus	Bur, Markus	Centre Suisse de Cartographie de la Faune		Bur, Markus
Osmia uncinata Gerstäcker, 1869	Switzerland	Freiburg	Tentlingen, Obertswil	46.7717	7.21683	760	1978-06-04	0	1	Bur, Markus	Bur, Markus	Centre Suisse de Cartographie de la Faune		Bur, Markus
Osmia uncinata Gerstäcker, 1869	Switzerland	Glarus	Ennenda, Geschiebesammler	47.0211	9.08389	540	2018-04-20	0	1	Müller, Andreas	Müller, Andreas	Centre Suisse de Cartographie de la Faune		Müller, Andreas
Osmia uncinata Gerstäcker, 1869	Switzerland	Graubünden	Brienz	46.6616	9.5958	1450	1995-07-19	0	1	Steinmann, Erwin	Steinmann, Erwin	Centre Suisse de Cartographie de la Faune		Müller, Andreas
Osmia uncinata Gerstäcker, 1869	Switzerland	Graubünden	Selva	46.6958	10.1074	1700	1932-06-14	1	0	Nadig, Adolf (senior)	Bündner Naturmuseum	Centre Suisse de Cartographie de la Faune		Herrmann, Mike
Osmia uncinata Gerstäcker, 1869	Switzerland	Graubünden	Chur	46.8543	9.52492		00.00.1910	0	4	Kriechbaumer, J.	Zoologische Staatssammlung München (ZSM)	Schmidt, Stefan Zoologische Staatssammlung München (ZSM)		Haeseler, Volker
Osmia uncinata Gerstäcker, 1869	Switzerland	Graubünden	Chur, Bettlerküche	46.8526	9.48539		1923-04-25	0	1	Nadig, Adolf (senior)	Eidgenössische Technische Hochschule Zürich (ETH)	Centre Suisse de Cartographie de la Faune		Müller, Andreas
Osmia uncinata Gerstäcker, 1869	Switzerland	Graubünden	Chur	46.8429	9.52437		1933-05-20	0	2	Nadig, Adolf (senior)	Eidgenössische Technische Hochschule Zürich (ETH)	Centre Suisse de Cartographie de la Faune		Müller, Andreas
Osmia uncinata Gerstäcker, 1869	Switzerland	Graubünden	Chur, Fürstenwald	46.8694	9.55164		1933-06-19	0	1	Nadig, Adolf (senior)	Eidgenössische Technische Hochschule Zürich (ETH)	Centre Suisse de Cartographie de la Faune		Müller, Andreas
Osmia uncinata Gerstäcker, 1869	Switzerland	Graubünden	Chur, Fürstenwald	46.8694	9.55164		1943-05-08	0	1	Nadig, Adolf (senior)	Eidgenössische Technische Hochschule Zürich (ETH)	Centre Suisse de Cartographie de la Faune		Müller, Andreas
Osmia uncinata Gerstäcker, 1869	Switzerland	Graubünden	Chur, Halde	46.8427	9.53748		1922-06-20	0	1	Nadig, Adolf (senior)	Eidgenössische Technische Hochschule Zürich (ETH)	Centre Suisse de Cartographie de la Faune		Müller, Andreas
Osmia uncinata Gerstäcker, 1869	Switzerland	Graubünden	Chur, Halde	46.8427	9.53748	700	1959-04-13	1	0	Steinmann, Erwin	Steinmann, Erwin	Centre Suisse de Cartographie de la Faune		Müller, Andreas
Osmia uncinata Gerstäcker, 1869	Switzerland	Graubünden	Chur, Mittenberg	46.8427	9.53748	890	1965-06-16	0	1	Steinmann, Erwin	Steinmann, Erwin	Centre Suisse de Cartographie de la Faune		Müller, Andreas
Osmia uncinata Gerstäcker, 1869	Switzerland	Graubünden	Domat Ems, T. Tschelli	46.8263	9.44506	620	1996-05-29	0	1	Steinmann, Erwin	Steinmann, Erwin	Centre Suisse de Cartographie de la Faune		Müller, Andreas
Osmia uncinata Gerstäcker, 1869	Switzerland	Graubünden	Felsberg, Neugüter	46.8439	9.47195	560	1993-05-11	0	1	Steinmann, Erwin	Steinmann, Erwin	Centre Suisse de Cartographie de la Faune		Müller, Andreas
Osmia uncinata Gerstäcker, 1869	Switzerland	Graubünden	Felsberg, Plattenzüg	46.8356	9.43229	620	1990-03-11	1	0	Steinmann, Erwin	Steinmann, Erwin	Centre Suisse de Cartographie de la Faune		Müller, Andreas
Osmia uncinata Gerstäcker, 1869	Switzerland	Graubünden	Felsberg, Schutthalde	46.8439	9.47195	590	1992-05-25	0	2	Steinmann, Erwin	Steinmann, Erwin	Centre Suisse de Cartographie de la Faune		Müller, Andreas
Osmia uncinata Gerstäcker, 1869	Switzerland	Graubünden	Felsberg, Unterberg	46.8529	9.47228	1000	1968-04-20	0	1	Steinmann, Erwin	Steinmann, Erwin	Centre Suisse de Cartographie de la Faune		Müller, Andreas
Osmia uncinata Gerstäcker, 1869	Switzerland	Graubünden	Filisur	46.6691	9.67455		1939-04-16	1	0	Wolf, Johann Peter	Eidgenössische Technische Hochschule Zürich (ETH)	Centre Suisse de Cartographie de la Faune		Müller, Andreas
Osmia uncinata Gerstäcker, 1869	Switzerland	Graubünden	Fläsch	47.023	9.5182	600	2007-05-01	0	1	Hansueli, Tinner	Hansueli, Tinner	Centre Suisse de Cartographie de la Faune
Osmia uncinata Gerstäcker, 1869	Switzerland	Graubünden	Haldenstein, Böfel	46.8701	9.51231	680	1998-05-08	1	1	Steinmann, Erwin	Steinmann, Erwin	Centre Suisse de Cartographie de la Faune		Müller, Andreas
Osmia uncinata Gerstäcker, 1869	Switzerland	Graubünden	Haldenstein, Böfel	46.8701	9.51231	680	1999-05-03	0	1	Steinmann, Erwin	Steinmann, Erwin	Centre Suisse de Cartographie de la Faune		Müller, Andreas
Osmia uncinata Gerstäcker, 1869	Switzerland	Graubünden	Haldenstein, Dürrboden	46.8701	9.51231	680	1990-05-16	0	1	Steinmann, Erwin	Steinmann, Erwin	Centre Suisse de Cartographie de la Faune		Müller, Andreas
Osmia uncinata Gerstäcker, 1869	Switzerland	Graubünden	Haldenstein, Dürrboden	46.8701	9.51231	630	1993-05-08	0	1	Steinmann, Erwin	Steinmann, Erwin	Centre Suisse de Cartographie de la Faune		Müller, Andreas
Osmia uncinata Gerstäcker, 1869	Switzerland	Graubünden	Haldenstein	46.8614	9.49885	1000	2013-06-08	0	1	Oertli, Sabine	Eidgenössische Technische Hochschule Zürich (ETH)	Centre Suisse de Cartographie de la Faune		Müller, Andreas
Osmia uncinata Gerstäcker, 1869	Switzerland	Graubünden	Haldenstein	46.8789	9.52577	590	1994-04-28	0	1	Bernasconi-Ockroy, Marco	Eidgenössische Technische Hochschule Zürich (ETH)	Centre Suisse de Cartographie de la Faune		Müller, Andreas
Osmia uncinata Gerstäcker, 1869	Switzerland	Graubünden	Haldenstein	46.8879	9.52612	720	2015-06-10	0	1	Herrmann, Mike	Eidgenössische Technische Hochschule Zürich (ETH)	Centre Suisse de Cartographie de la Faune		Herrmann, Mike
Osmia uncinata Gerstäcker, 1869	Switzerland	Graubünden	Haldenstein	46.8791	9.51265	660	1998-05-09	0	1	Steinmann, Erwin	Steinmann, Erwin	Centre Suisse de Cartographie de la Faune		Müller, Andreas
Osmia uncinata Gerstäcker, 1869	Switzerland	Graubünden	Haldenstein, Liechtenstein	46.8789	9.52577	730	1999-05-16	0	1	Steinmann, Erwin	Steinmann, Erwin	Centre Suisse de Cartographie de la Faune		Müller, Andreas
Osmia uncinata Gerstäcker, 1869	Switzerland	Graubünden	Haldenstein, Oldis	46.8879	9.52612	560	1971-05-17	0	1	Steinmann, Erwin	Steinmann, Erwin	Centre Suisse de Cartographie de la Faune		Müller, Andreas
Osmia uncinata Gerstäcker, 1869	Switzerland	Graubünden	Haldenstein	46.8789	9.52577	745	1999-05-10	0	1	Steinmann, Erwin	Steinmann, Erwin	Centre Suisse de Cartographie de la Faune		Müller, Andreas
Osmia uncinata Gerstäcker, 1869	Switzerland	Graubünden	Haldenstein, Tschingels	46.8614	9.49885	790	1989-06-09	0	1	Steinmann, Erwin	Steinmann, Erwin	Centre Suisse de Cartographie de la Faune		Müller, Andreas
Osmia uncinata Gerstäcker, 1869	Switzerland	Graubünden	Haldenstein, Tschingels	46.8614	9.49885	780	1993-05-30	0	1	Steinmann, Erwin	Steinmann, Erwin	Centre Suisse de Cartographie de la Faune		Müller, Andreas
Osmia uncinata Gerstäcker, 1869	Switzerland	Graubünden	Maladers	46.8334	9.55023		1923-04-15	0	2	Nadig, Adolf (senior)	Eidgenössische Technische Hochschule Zürich (ETH)	Centre Suisse de Cartographie de la Faune		Müller, Andreas
Osmia uncinata Gerstäcker, 1869	Switzerland	Graubünden	Rothenbrunnen	46.7638	9.41654		1924-04-14	1	0	Nadig, Adolf (senior)	Eidgenössische Technische Hochschule Zürich (ETH)	Centre Suisse de Cartographie de la Faune		Müller, Andreas
Osmia uncinata Gerstäcker, 1869	Switzerland	Graubünden	Rothenbrunnen	46.7638	9.41654		1932-05-15	0	2	Nadig, Adolf (senior)	Eidgenössische Technische Hochschule Zürich (ETH)	Centre Suisse de Cartographie de la Faune		Müller, Andreas
Osmia uncinata Gerstäcker, 1869	Switzerland	Graubünden	Versam	46.8014	9.32618	620	2016-05-21	0	1	Müller, Andreas	Müller, Andreas	Centre Suisse de Cartographie de la Faune		Müller, Andreas
Osmia uncinata Gerstäcker, 1869	Switzerland	Graubünden	Versam	46.8014	9.32618	790	2016-06-06	0	1	Müller, Andreas	Praz, Christophe	Centre Suisse de Cartographie de la Faune		Müller, Andreas
Osmia uncinata Gerstäcker, 1869	Switzerland	Graubünden	Sagogn	46.7844	9.26009	720	2009-03-31	1	0	Hansueli, Tinner	Hansueli, Tinner	Centre Suisse de Cartographie de la Faune		Hansueli, Tinner
Osmia uncinata Gerstäcker, 1869	Switzerland	Graubünden	Scheid	46.7724	9.44305	980	1985-05-12	0	1	Steinmann, Erwin	Steinmann, Erwin	Centre Suisse de Cartographie de la Faune		Müller, Andreas
Osmia uncinata Gerstäcker, 1869	Switzerland	Graubünden	Scuol	46.7999	10.2698	1390	2015-07-10	0	1	Sedivy, Claudio	Sedivy, Claudio	Centre Suisse de Cartographie de la Faune		Sedivy, Claudio
Osmia uncinata Gerstäcker, 1869	Switzerland	Graubünden	Sent	46.8069	10.3489	1130	2016-06-10	1	0	Müller, Andreas	Praz, Christophe	Centre Suisse de Cartographie de la Faune		Müller, Andreas
Osmia uncinata Gerstäcker, 1869	Switzerland	Graubünden	Sent	46.8069	10.3489	1140	2016-07-04	0	1	Müller, Andreas	Müller, Andreas	Centre Suisse de Cartographie de la Faune		Müller, Andreas
Osmia uncinata Gerstäcker, 1869	Switzerland	Graubünden	Sent	46.8069	10.3489	1130	2016-08-14	0	1	Müller, Andreas	Müller, Andreas	Centre Suisse de Cartographie de la Faune		Müller, Andreas
Osmia uncinata Gerstäcker, 1869	Switzerland	Graubünden	Tamins, Reichenau	46.827	9.40575		1924-05-18	0	1	Nadig, Adolf (senior)	Eidgenössische Technische Hochschule Zürich (ETH)	Centre Suisse de Cartographie de la Faune		Müller, Andreas
Osmia uncinata Gerstäcker, 1869	Switzerland	Graubünden	Tomils	46.7636	9.42963	820	2013-06-07	0	1	Herrmann, Mike	Eidgenössische Technische Hochschule Zürich (ETH)	Centre Suisse de Cartographie de la Faune		Herrmann, Mike
Osmia uncinata Gerstäcker, 1869	Switzerland	Graubünden	Trimmis	46.8911	9.56431		00.00.2019	0	0	Müller, Andreas		Centre Suisse de Cartographie de la Faune
Osmia uncinata Gerstäcker, 1869	Switzerland	Graubünden	Tomils	46.7634	9.44272	900	1998-06-23	0	1	Steinmann, Erwin	Steinmann, Erwin	Centre Suisse de Cartographie de la Faune		Müller, Andreas
Osmia uncinata Gerstäcker, 1869	Switzerland	Graubünden	Tomils, Strasse Scheid	46.7634	9.44272	900	1995-05-23	0	1	Steinmann, Erwin	Steinmann, Erwin	Centre Suisse de Cartographie de la Faune		Müller, Andreas
Osmia uncinata Gerstäcker, 1869	Switzerland	Graubünden	Tomils	46.7636	9.42963	720	1995-05-23	0	1	Steinmann, Erwin	Steinmann, Erwin	Centre Suisse de Cartographie de la Faune		Müller, Andreas
Osmia uncinata Gerstäcker, 1869	Switzerland	Graubünden	Untervaz (Burgruine Neuburg)	46.9056	9.53994	550	1997-04-23	0	1	Steinmann, Erwin	Steinmann, Erwin	Centre Suisse de Cartographie de la Faune		Müller, Andreas
Osmia uncinata Gerstäcker, 1869	Switzerland	Graubünden	Untervaz	46.9239	9.52751		1934-04-29	0	1	Nadig, Adolf (senior)	Eidgenössische Technische Hochschule Zürich (ETH)	Centre Suisse de Cartographie de la Faune		Müller, Andreas
Osmia uncinata Gerstäcker, 1869	Switzerland	Graubünden	Untervaz	46.9239	9.52751	560	2001-05-01	0	1	Hansueli, Tinner	Hansueli, Tinner	Centre Suisse de Cartographie de la Faune		Hansueli, Tinner
Osmia uncinata Gerstäcker, 1869	Switzerland	Graubünden	Sta.Maria, Val Müstair	46.6071	10.4165	1550	2018-04-25	1	0	Hansueli, Tinner	Bündner Naturmuseum	Centre Suisse de Cartographie de la Faune		TINNEHA01
Osmia uncinata Gerstäcker, 1869	Switzerland	Graubünden	Valsot, Ramosch	46.8242	10.376	1130	2014-08-22	0	1	Martz, Holger	Martz, Holger	Centre Suisse de Cartographie de la Faune		Herrmann, Mike
Osmia uncinata Gerstäcker, 1869	Switzerland	Graubünden	Zernez	46.6961	10.0943		1932-06-10	0	1	Nadig, Adolf (senior)	Bündner Naturmuseum	Centre Suisse de Cartographie de la Faune		Herrmann, Mike
Osmia uncinata Gerstäcker, 1869	Switzerland	Graubünden	Zizers, Bahnbord	46.9259	9.56306	540	2002-05-10	0	1	Tinner, H.		Müller, Andreas		Müller, Andreas
Osmia uncinata Gerstäcker, 1869	Switzerland	Jura	Undervelier	47.3025	7.22781	600	1992-06-15	0	1	Amiet, Felix	Amiet, Felix	Centre Suisse de Cartographie de la Faune		Amiet, Felix
Osmia uncinata Gerstäcker, 1869	Switzerland	Neuenburg	Auvernier	46.9685	6.87432		1962-06-16	0	1	de Beaumont, Jacques	Musée cantonal de zoologie Lausanne (MZL)	Centre Suisse de Cartographie de la Faune		NEUMERA01
Osmia uncinata Gerstäcker, 1869	Switzerland	Neuenburg	Auvernier	46.9685	6.87432		1964-04-17	1	0	de Beaumont, Jacques	Musée cantonal de zoologie Lausanne (MZL)	Centre Suisse de Cartographie de la Faune		NEUMERA01
Osmia uncinata Gerstäcker, 1869	Switzerland	Neuenburg	Le Landeron, Joumes, Chanet	47.0683	7.07074	760	2014-05-17	0	1	Gonseth, Yves		Centre Suisse de Cartographie de la Faune		Gonseth, Yves
Osmia uncinata Gerstäcker, 1869	Switzerland	Neuenburg	Neuchâtel, Chemin de La Châtelainie	47.0048	6.95281	660	2012-04-28	0	2	Ducommun, Alain	Ducommun, Alain	Centre Suisse de Cartographie de la Faune
Osmia uncinata Gerstäcker, 1869	Switzerland	Neuenburg	Neuchâtel, Côte de Chaumont, clairière hêtraie	47.0137	6.92642	1003	2010-06-27	0	1	Gonseth, Yves	Musée d'histoire naturelle, Neuchâtel (MHNN)	Centre Suisse de Cartographie de la Faune
Osmia uncinata Gerstäcker, 1869	Switzerland	Neuenburg	Neuchâtel, Perrolets / Saint-Jean	46.9957	6.92663	605	2012-05-20	0	1	Ducommun, Alain	Ducommun, Alain	Centre Suisse de Cartographie de la Faune
Osmia uncinata Gerstäcker, 1869	Switzerland	Neuenburg	Neuchâtel, Perrolets / Saint-Jean	46.9957	6.92663	605	2013-04-14	2	0	Ducommun, Alain	Ducommun, Alain	Centre Suisse de Cartographie de la Faune
Osmia uncinata Gerstäcker, 1869	Switzerland	Neuenburg	Neuchâtel, Perrolets / Saint-Jean	46.9957	6.92663	605	2013-05-05	0	1	Ducommun, Alain	Ducommun, Alain	Centre Suisse de Cartographie de la Faune
Osmia uncinata Gerstäcker, 1869	Switzerland	Neuenburg	Neuchâtel, Pied de Chaumont	47.0048	6.93966		1904-05-16	1	0	Jacob Baptiste Jacques	Musée cantonal de zoologie Lausanne (MZL)	Centre Suisse de Cartographie de la Faune		NEUMERA01
Osmia uncinata Gerstäcker, 1869	Switzerland	Nidwalden	Stansstad, Lopper	46.9665	8.31993		1947-04-15	0	1	Linsenmaier, Walter	Linsenmaier, Walter	Centre Suisse de Cartographie de la Faune		Amiet, Felix
Osmia uncinata Gerstäcker, 1869	Switzerland	Schaffhausen	Beringen, Färberwisli	47.7019	8.58532	565	2016-05-09	0	1	Neumeyer-Funk, Rainer	Praz, Christophe	Centre Suisse de Cartographie de la Faune		NEUMERA01
Osmia uncinata Gerstäcker, 1869	Switzerland	Schaffhausen	Merishausen, Ladel	47.7647	8.60002		2010-06-26	0	3	Müller, Andreas	Müller, Andreas	Centre Suisse de Cartographie de la Faune		Müller, Andreas
Osmia uncinata Gerstäcker, 1869	Switzerland	Schaffhausen	Schaffhausen	47.6925	8.62508		1937-05-23	0	1	Vogelsanger, Ernst	Museum zu Allerheiligen, Schaffhausen (NMSH)	Centre Suisse de Cartographie de la Faune		Müller, Andreas
Osmia uncinata Gerstäcker, 1869	Switzerland	Schaffhausen	Schaffhausen	47.6925	8.62508		1946-05-18	0	1	Vogelsanger, Ernst	Museum zu Allerheiligen, Schaffhausen (NMSH)	Centre Suisse de Cartographie de la Faune		Müller, Andreas
Osmia uncinata Gerstäcker, 1869	Switzerland	Schwyz	Gersau, Oberholz	46.9916	8.54386	550	1981-05-07	0	1	Reser-Rezbanyai, Ladislaus	Müller, Andreas	Centre Suisse de Cartographie de la Faune		Müller, Andreas
Osmia uncinata Gerstäcker, 1869	Switzerland	Schwyz	Gersau, Oberholz	46.9916	8.54386	550	1983-04-25	0	1	Reser-Rezbanyai, Ladislaus	Müller, Andreas	Centre Suisse de Cartographie de la Faune		Müller, Andreas
Osmia uncinata Gerstäcker, 1869	Switzerland	Solothurn	Balm b. Messen	47.0958	7.4394	500	1993-05-19	0	1	Amiet, Felix	Amiet, Felix	Centre Suisse de Cartographie de la Faune		Amiet, Felix
Osmia uncinata Gerstäcker, 1869	Switzerland	Solothurn	Balsthal, Haulen, Wiese West	47.3205	7.67753	560	2003-04-24	0	1	Artmann-Graf, Georg		Centre Suisse de Cartographie de la Faune		Artmann-Graf, Georg
Osmia uncinata Gerstäcker, 1869	Switzerland	Solothurn	Balsthal, Roggen, Weide Ost	47.3024	7.71712	770	1993-06-28	0	1	Artmann-Graf, Georg	Artmann-Graf, Georg	Centre Suisse de Cartographie de la Faune		Artmann-Graf, Georg
Osmia uncinata Gerstäcker, 1869	Switzerland	Solothurn	Bettlach, Bettlachstock	47.2218	7.413	1200	1984-06-02	1	0	Amiet, Felix	Amiet, Felix	Centre Suisse de Cartographie de la Faune		Amiet, Felix
Osmia uncinata Gerstäcker, 1869	Switzerland	Solothurn	Egerkingen, Trockenwald Burst Losen (Lampast)	47.3292	7.79664	550	1998-06-19	0	1	Artmann-Graf, Georg	Artmann-Graf, Georg	Centre Suisse de Cartographie de la Faune		Artmann-Graf, Georg
Osmia uncinata Gerstäcker, 1869	Switzerland	Solothurn	Egerkingen, Wiese südlich Losen	47.3202	7.78335	600	1998-05-30	0	1	Artmann-Graf, Georg	Artmann-Graf, Georg	Centre Suisse de Cartographie de la Faune		Artmann-Graf, Georg
Osmia uncinata Gerstäcker, 1869	Switzerland	Solothurn	Rüttenen, Waldegg	47.2217	7.54504	500	1987-06-06	0	1	Amiet, Felix	Amiet, Felix	Centre Suisse de Cartographie de la Faune		Amiet, Felix
Osmia uncinata Gerstäcker, 1869	Switzerland	Solothurn	Günsberg, Wasserfallen, Glutzenberg, Dälen, Säget	47.2577	7.55832	800	2003-04-28	1	1	Amiet, Felix	Naturhistorischen Museum Bern (NMBE)	Centre Suisse de Cartographie de la Faune		Amiet, Felix
Osmia uncinata Gerstäcker, 1869	Switzerland	Solothurn	Günsberg, Wasserfallen, Glutzenberg, Dälen, Säget	47.2577	7.55832	800	2004-04-01	1	0	Amiet, Felix	Amiet, Felix	Centre Suisse de Cartographie de la Faune		Amiet, Felix
Osmia uncinata Gerstäcker, 1869	Switzerland	Solothurn	Hauenstein-Ifenthal, Waldrand nordwestlich Ifenthal	47.365	7.8366	755	2009-04-21	0	1	Artmann-Graf, Georg		Centre Suisse de Cartographie de la Faune		Artmann-Graf, Georg
Osmia uncinata Gerstäcker, 1869	Switzerland	Solothurn	Holderbank, Rinderweid Südwest und Nord	47.3384	7.73054	850	1993-05-09	0	1	Artmann-Graf, Georg	Artmann-Graf, Georg	Centre Suisse de Cartographie de la Faune		Artmann-Graf, Georg
Osmia uncinata Gerstäcker, 1869	Switzerland	Solothurn	Holderbank, Untere Allmend	47.3383	7.74377	790	2003-06-05	0	1	Artmann-Graf, Georg		Centre Suisse de Cartographie de la Faune		Artmann-Graf, Georg
Osmia uncinata Gerstäcker, 1869	Switzerland	Solothurn	Laupersdorf, Bremgarten, Weide südlich Damm	47.3295	7.6511	900	2013-04-25	1	0	Artmann-Graf, Georg	Artmann-Graf, Georg	Centre Suisse de Cartographie de la Faune		Artmann-Graf, Georg
Osmia uncinata Gerstäcker, 1869	Switzerland	Solothurn	Laupersdorf, Rossweidli, Mittelstreifen	47.2845	7.66414	1050	2013-06-07	0	1	Artmann-Graf, Georg	Artmann-Graf, Georg	Centre Suisse de Cartographie de la Faune		Artmann-Graf, Georg
Osmia uncinata Gerstäcker, 1869	Switzerland	Solothurn	Laupersdorf, Rossweidli, Waldecke Süd	47.2845	7.66414	1060	2002-05-30	0	1	Artmann-Graf, Georg		Centre Suisse de Cartographie de la Faune		Artmann-Graf, Georg
Osmia uncinata Gerstäcker, 1869	Switzerland	Solothurn	Laupersdorf, Rutschhang Kleinbrunnersberg	47.3296	7.62464	1090	2013-06-16	0	1	Artmann-Graf, Georg		Centre Suisse de Cartographie de la Faune		Artmann-Graf, Georg
Osmia uncinata Gerstäcker, 1869	Switzerland	Solothurn	Laupersdorf, Spielwiese Pfadiheim	47.3205	7.65107	660	2002-06-13	0	1	Artmann-Graf, Georg		Centre Suisse de Cartographie de la Faune		Artmann-Graf, Georg
Osmia uncinata Gerstäcker, 1869	Switzerland	Solothurn	Laupersdorf, Waldecke Schwang	47.3205	7.65107	660	2012-04-28	1	0	Artmann-Graf, Georg	Artmann-Graf, Georg	Centre Suisse de Cartographie de la Faune		Artmann-Graf, Georg
Osmia uncinata Gerstäcker, 1869	Switzerland	Solothurn	Laupersdorf, Waldweide Mausteren	47.3296	7.63787	950	2012-05-10	0	1	Artmann-Graf, Georg	Artmann-Graf, Georg	Centre Suisse de Cartographie de la Faune		Artmann-Graf, Georg
Osmia uncinata Gerstäcker, 1869	Switzerland	Solothurn	Lostorf, Jeppensack/Mahren, Wiese oberhalb Weg	47.3738	7.90288	570	2009-04-10	1	1	Artmann-Graf, Georg	Artmann-Graf, Georg	Centre Suisse de Cartographie de la Faune		Artmann-Graf, Georg
Osmia uncinata Gerstäcker, 1869	Switzerland	Solothurn	Lostorf, Mahren, Wiese/Weide Nordost	47.3827	7.9162	515	1999-05-27	0	1	Artmann-Graf, Georg		Centre Suisse de Cartographie de la Faune		Artmann-Graf, Georg
Osmia uncinata Gerstäcker, 1869	Switzerland	Solothurn	Lostorf, Naturschutz-Reservat des Vogelschutzvereins	47.3916	7.94278	560	2000-04-04	0	1	Artmann-Graf, Georg	Artmann-Graf, Georg	Centre Suisse de Cartographie de la Faune		Artmann-Graf, Georg
Osmia uncinata Gerstäcker, 1869	Switzerland	Solothurn	Lostorf, Naturschutz-Reservat des Vogelschutzvereins	47.3916	7.94278	560	2009-04-15	0	1	Artmann-Graf, Georg		Centre Suisse de Cartographie de la Faune		Artmann-Graf, Georg
Osmia uncinata Gerstäcker, 1869	Switzerland	Solothurn	Lostorf, Orchideenreservat Mahren	47.3738	7.90288	540	2007-05-01	0	1	Artmann-Graf, Georg		Centre Suisse de Cartographie de la Faune		Artmann-Graf, Georg
Osmia uncinata Gerstäcker, 1869	Switzerland	Solothurn	Lostorf, Weide Schlosshalde	47.3827	7.92945	540	1999-06-02	0	1	Artmann-Graf, Georg		Centre Suisse de Cartographie de la Faune		Artmann-Graf, Georg
Osmia uncinata Gerstäcker, 1869	Switzerland	Solothurn	Lostorf, Wiese Schnäpfenmätteli/Fellis	47.4007	7.92961	660	1999-05-02	0	1	Artmann-Graf, Georg	Artmann-Graf, Georg	Centre Suisse de Cartographie de la Faune		Artmann-Graf, Georg
Osmia uncinata Gerstäcker, 1869	Switzerland	Solothurn	Mümliswil-Ramiswil, Waldwiese östlich Vorder Allmend	47.3474	7.70412	765	2009-05-07	0	1	Artmann-Graf, Georg		Centre Suisse de Cartographie de la Faune		Artmann-Graf, Georg
Osmia uncinata Gerstäcker, 1869	Switzerland	Solothurn	Oberbuchsiten, Alphöchi, Weide Süd	47.3203	7.74367	780	2004-05-25	0	1	Artmann-Graf, Georg		Centre Suisse de Cartographie de la Faune		Artmann-Graf, Georg
Osmia uncinata Gerstäcker, 1869	Switzerland	Solothurn	Olten, Hagberg/Gämpfi (Bannwald)	47.3558	7.88949	480	2012-05-17	0	2	Artmann-Graf, Georg	Artmann-Graf, Georg	Centre Suisse de Cartographie de la Faune		Artmann-Graf, Georg
Osmia uncinata Gerstäcker, 1869	Switzerland	Solothurn	Rickenbach	47.338	7.84964		1994-06-09	0	1	Amiet, Felix	Müller, Andreas	Centre Suisse de Cartographie de la Faune		Amiet, Felix
Osmia uncinata Gerstäcker, 1869	Switzerland	Solothurn	Rüttenen, Vorberg	47.2397	7.51866	800	1972-05-03	1	0	Amiet, Felix	Amiet, Felix	Centre Suisse de Cartographie de la Faune		Amiet, Felix
Osmia uncinata Gerstäcker, 1869	Switzerland	Solothurn	Rüttenen, Vorberg	47.2397	7.51866	800	1972-05-22	0	1	Amiet, Felix	Amiet, Felix	Centre Suisse de Cartographie de la Faune		Amiet, Felix
Osmia uncinata Gerstäcker, 1869	Switzerland	Solothurn	Rüttenen, Vorberg	47.2397	7.51866	800	1972-05-29	1	0	Amiet, Felix	Amiet, Felix	Centre Suisse de Cartographie de la Faune		Amiet, Felix
Osmia uncinata Gerstäcker, 1869	Switzerland	Solothurn	Rüttenen, Vorberg	47.2397	7.51866	800	1972-06-05	0	2	Amiet, Felix	Amiet, Felix	Centre Suisse de Cartographie de la Faune		Amiet, Felix
Osmia uncinata Gerstäcker, 1869	Switzerland	Solothurn	Solothurn, Weissenstein, Nesselboden, Stigelos	47.2398	7.50545	1000	1995-06-28	0	1	Amiet, Felix	Amiet, Felix	Centre Suisse de Cartographie de la Faune		Amiet, Felix
Osmia uncinata Gerstäcker, 1869	Switzerland	St. Gallen	Oberbüren	47.434	9.14969	504	2018-05-12	0	1	Schauwecker, Yannick	Praz, Christophe	Centre Suisse de Cartographie de la Faune		SCHAUYA01
Osmia uncinata Gerstäcker, 1869	Switzerland	St. Gallen	Quarten, Schilt	47.1268	9.23216	430	2001-05-20	0	1	Neumeyer-Funk, Rainer	Neumeyer-Funk, Rainer	Centre Suisse de Cartographie de la Faune		Neumeyer-Funk, Rainer
Osmia uncinata Gerstäcker, 1869	Switzerland	St. Gallen	Rapperswil-Jona	47.2126	8.89171	485	2014-03-30	0	1	Sedivy, Claudio	Eidgenössische Technische Hochschule Zürich (ETH)	Centre Suisse de Cartographie de la Faune		SEDIVCL01
Osmia uncinata Gerstäcker, 1869	Switzerland	St. Gallen	Walenstadt, Flums	47.0887	9.36264	850	2016-05-07	0	1	Sedivy, Claudio	Praz, Christophe	Centre Suisse de Cartographie de la Faune		SEDIVCL01
Osmia uncinata Gerstäcker, 1869	Switzerland	Thurgau	Fischingen, Au (TG)	47.3918	8.9496		1980-05-01	0	1	Müller, Peter	Müller, Peter	Centre Suisse de Cartographie de la Faune		Herrmann, Mike
Osmia uncinata Gerstäcker, 1869	Switzerland	Thurgau	Immenberg	47.5317	8.98678	600	2007-05-10	2	0	Müller, Andreas		Müller, Andreas		Müller, Andreas
Osmia uncinata Gerstäcker, 1869	Switzerland	Thurgau	Lommis, Magerwiese Kalthäusern	47.5175	8.96645	520	00.00.2007	0	1	Herrmann, Mike	Herrmann, Mike	Centre Suisse de Cartographie de la Faune		Herrmann, Mike
Osmia uncinata Gerstäcker, 1869	Switzerland	Thurgau	Lommis, Weingarten, Loch	47.5264	8.97999	560	00.00.2007	0	1	Herrmann, Mike	Herrmann, Mike	Centre Suisse de Cartographie de la Faune		Herrmann, Mike
Osmia uncinata Gerstäcker, 1869	Switzerland	Thurgau	Lommis, Weingarten, Loch	47.5264	8.97999	550	1994-04-29	0	1	Blöchlinger, Hermann	Naturmuseum Thurgau, Frauenfeld (NMTG)	Centre Suisse de Cartographie de la Faune		Herrmann, Mike
Osmia uncinata Gerstäcker, 1869	Switzerland	Thurgau	Stettfurt, Lommis	47.5177	8.95318	515	00.00.2007	0	1	Herrmann, Mike	Herrmann, Mike	Centre Suisse de Cartographie de la Faune		Herrmann, Mike
Osmia uncinata Gerstäcker, 1869	Switzerland	Waadt	Belmont-sur-Lausanne, Bois de Belmont	46.5175	6.67051		1941-05-06	1	0	de Beaumont, Jacques	Musée cantonal de zoologie Lausanne (MZL)	Centre Suisse de Cartographie de la Faune		NEUMERA01
Osmia uncinata Gerstäcker, 1869	Switzerland	Waadt	Bussigny	46.5436	6.55278		1959-04-14	0	1	de Beaumont, Jacques	Musée cantonal de zoologie Lausanne (MZL)	Centre Suisse de Cartographie de la Faune		NEUMERA01
Osmia uncinata Gerstäcker, 1869	Switzerland	Waadt	Corsier-sur-Vevey, Mont de Corsier	46.4916	6.86627		1962-06-06	1	0	de Beaumont, Jacques	Musée cantonal de zoologie Lausanne (MZL)	Centre Suisse de Cartographie de la Faune		NEUMERA01
Osmia uncinata Gerstäcker, 1869	Switzerland	Wallis	Blatten (Lötschen)	46.4205	7.8167	1540	1997-07-16	0	1	Amiet, Felix	Amiet, Felix	Centre Suisse de Cartographie de la Faune		Amiet, Felix
Osmia uncinata Gerstäcker, 1869	Switzerland	Wallis	Blatten, Äusseres Faflertal	46.4384	7.84285	1920	2016-07-17	0	1	Artmann-Graf, Georg	Artmann-Graf, Georg	Centre Suisse de Cartographie de la Faune		Artmann-Graf, Georg
Osmia uncinata Gerstäcker, 1869	Switzerland	Wallis	Bovernier, La Ravoire	46.0786	7.07746	1000	2012-05-11	0	1	Praz, Christophe	Praz, Christophe	Centre Suisse de Cartographie de la Faune		PRAZ_CH01
Osmia uncinata Gerstäcker, 1869	Switzerland	Wallis	Lötschental	46.4026	7.79057		1919-06-22	0	1	Steck-Hofmann, Theodor	Neues Museum Biel (NMB)	Centre Suisse de Cartographie de la Faune		Müller, Andreas
Osmia uncinata Gerstäcker, 1869	Switzerland	Wallis	Pfynwald	46.295	7.59519		1963-06-03	0	1	Sauter, Willy	Eidgenössische Technische Hochschule Zürich (ETH)	Centre Suisse de Cartographie de la Faune		Müller, Andreas
Osmia uncinata Gerstäcker, 1869	Switzerland	Wallis	Chandolin, Alpe Ponchet	46.2681	7.58214		4.7.0000	0	1	Frey-Gessner, Emil	Naturhistorischen Museum Bern (NMBE)	Centre Suisse de Cartographie de la Faune		Amiet, Felix
Osmia uncinata Gerstäcker, 1869	Switzerland	Wallis	Crans-Montana, Diogne	46.2861	7.49134			0	0	Hirt, Karl		Centre Suisse de Cartographie de la Faune
Osmia uncinata Gerstäcker, 1869	Switzerland	Wallis	Crans-Montana, Mollens	46.3131	7.51734			0	0	Hirt, Karl		Centre Suisse de Cartographie de la Faune
Osmia uncinata Gerstäcker, 1869	Switzerland	Wallis	Crans-Montana, Tovachir	46.2861	7.50432			0	0	Hirt, Karl		Centre Suisse de Cartographie de la Faune
Osmia uncinata Gerstäcker, 1869	Switzerland	Wallis	Erschmatt, Bawald	46.3218	7.69915	1370	2001-06-30	0	1	Oertli, Sabine	Eidgenössische Technische Hochschule Zürich (ETH)	Centre Suisse de Cartographie de la Faune		Müller, Andreas
Osmia uncinata Gerstäcker, 1869	Switzerland	Wallis	Gampel, Jeizinen	46.3218	7.71213	1500	1991-07-07	0	1	Müller, Andreas	Müller, Andreas	Centre Suisse de Cartographie de la Faune		Müller, Andreas
Osmia uncinata Gerstäcker, 1869	Switzerland	Wallis	Goms, Gluringen	46.4634	8.22061	1640	2017-05-17	1	0	Wenger, Remo	Praz, Christophe	Centre Suisse de Cartographie de la Faune		WENGERE01
Osmia uncinata Gerstäcker, 1869	Switzerland	Wallis	Grächen, Grächerwald	46.1865	7.84099	1750	2008-07-14	1	0	Müller, Andreas		Müller, Andreas		Müller, Andreas
Osmia uncinata Gerstäcker, 1869	Switzerland	Wallis	Grimentz	46.1781	7.56895		1944-08-04	0	1	de Beaumont, Jacques	Musée cantonal de zoologie Lausanne (MZL)	Centre Suisse de Cartographie de la Faune		NEUMERA01
Osmia uncinata Gerstäcker, 1869	Switzerland	Wallis	Leuk, Höhwald (Waldbrandfläche)	46.3296	7.65868	1460	2005-06-21	0	1	Moretti, M.		Müller, Andreas		Müller, Andreas
Osmia uncinata Gerstäcker, 1869	Switzerland	Wallis	Leuk, Höhwald (Waldbrandfläche)	46.3307	7.64097	1235	2005-05-31	0	1	Moretti, M.		Müller, Andreas		Müller, Andreas
Osmia uncinata Gerstäcker, 1869	Switzerland	Wallis	Leuk, Höhwald (Waldbrandfläche)	46.3356	7.6587	1705	2008-06-03	0	1	Moretti, M.		Müller, Andreas		Müller, Andreas
Osmia uncinata Gerstäcker, 1869	Switzerland	Wallis	Susten, Pfynwald	46.304	7.63416		14.07.1899	0	1	Jacob Baptiste Jacques	Musée cantonal de zoologie Lausanne (MZL)	Centre Suisse de Cartographie de la Faune		NEUMERA01
Osmia uncinata Gerstäcker, 1869	Switzerland	Wallis	Leuk, Pfynwald	46.304	7.59521	560	1993-05-20	0	1	Neumeyer-Funk, Rainer	Amiet, Felix	Centre Suisse de Cartographie de la Faune		Amiet, Felix
Osmia uncinata Gerstäcker, 1869	Switzerland	Wallis	Miège, Planige - Cordona	46.3131	7.5433	800	2002-06-01	0	1	Hirt, Karl	Hirt, Karl	Centre Suisse de Cartographie de la Faune		Hirt, Karl
Osmia uncinata Gerstäcker, 1869	Switzerland	Wallis	Miège, Les Crevais	46.3131	7.5433	808	2010-07-02	0	1	Hirt, Karl	Hirt, Karl	Centre Suisse de Cartographie de la Faune
Osmia uncinata Gerstäcker, 1869	Switzerland	Wallis	Miège,, Les Crevais	46.3131	7.5433	808	2012-03-28	0	1	Hirt, Karl	Hirt, Karl	Centre Suisse de Cartographie de la Faune
Osmia uncinata Gerstäcker, 1869	Switzerland	Wallis	Randa bei Zermatt	46.1011	7.78235		1967-07-15	0	1	Haas	Zoologische Staatssammlung München (ZSM)	Schmidt, Stefan Zoologische Staatssammlung München (ZSM)		Haeseler, Volker
Osmia uncinata Gerstäcker, 1869	Switzerland	Wallis	Ried-Brig, Berisal	46.2934	8.06242		1919-06-30	0	1	von Schulthess Rechberg (Schindler) Anton	Eidgenössische Technische Hochschule Zürich (ETH)	Centre Suisse de Cartographie de la Faune		Müller, Andreas
Osmia uncinata Gerstäcker, 1869	Switzerland	Wallis	St-Luc, Niouc	46.2681	7.54322		12.05.0000	1	0	Frey-Gessner, Emil	Naturhistorischen Museum Bern (NMBE)	Centre Suisse de Cartographie de la Faune		Amiet, Felix
Osmia uncinata Gerstäcker, 1869	Switzerland	Wallis	Simplon	46.1945	8.04834			1	0	Joris, C.	Naturhistorischen Museum Bern (NMBE)	Centre Suisse de Cartographie de la Faune		Amiet, Felix
Osmia uncinata Gerstäcker, 1869	Switzerland	Wallis	Simplon, Berisal	46.2934	8.06242		18.07.0000	1	0	Frey-Gessner, Emil	Naturhistorischen Museum Bern (NMBE)	Centre Suisse de Cartographie de la Faune		Amiet, Felix
Osmia uncinata Gerstäcker, 1869	Switzerland	Wallis	Susten, Pfynwald	46.304	7.63416			0	0	Amiet, Felix		Centre Suisse de Cartographie de la Faune
Osmia uncinata Gerstäcker, 1869	Switzerland	Wallis	Visperterminen	46.2582	7.90637	1560	1995-07-19	0	1	Merz, Bernhard	Eidgenössische Technische Hochschule Zürich (ETH)	Centre Suisse de Cartographie de la Faune		Müller, Andreas
Osmia uncinata Gerstäcker, 1869	Switzerland	Wallis	Visperterminen	46.2492	7.90629	1650	2002-06-22	0	1	Amiet, Felix	Naturhistorischen Museum Bern (NMBE)	Centre Suisse de Cartographie de la Faune		Amiet, Felix
Osmia uncinata Gerstäcker, 1869	Switzerland	Wallis	Zeneggen	46.2764	7.85463	1440	2018-05-18	1	0	Herrmann, Mike	Praz, Christophe	Centre Suisse de Cartographie de la Faune		Herrmann, Mike
Osmia uncinata Gerstäcker, 1869	Switzerland	Wallis	Zeneggen	46.2764	7.85463	1460	2018-07-12	0	1	Herrmann, Mike	Praz, Christophe	Centre Suisse de Cartographie de la Faune		Herrmann, Mike
Osmia uncinata Gerstäcker, 1869	Switzerland	Zürich	Landikon	47.3522	8.45866		1980-05-23	0	1	Müller, Peter	Müller, Peter	Centre Suisse de Cartographie de la Faune		Herrmann, Mike
Osmia uncinata Gerstäcker, 1869	Switzerland	Zürich	Landikon	47.3522	8.45866		1980-06-13	0	2	Müller, Peter	Müller, Peter	Centre Suisse de Cartographie de la Faune		Herrmann, Mike
Osmia uncinata Gerstäcker, 1869	Switzerland	Zürich	Dättnau, Talacher	47.4948	8.6887	500	2006-05-10	1	0	Müller, Andreas		Müller, Andreas		Müller, Andreas
Osmia uncinata Gerstäcker, 1869	Switzerland	Zürich	Winterthur, Hoch-Wülflingen	47.4987	8.6862	590	2005-05-20	1	0	Müller, Andreas		Müller, Andreas		Müller, Andreas
Osmia uncinata Gerstäcker, 1869	Switzerland	Zürich	Illnau-Effretikon, Schüsselberg	47.4125	8.72487	530	1987-05-09	1	0	Sauter, Willy	Eidgenössische Technische Hochschule Zürich (ETH)	Centre Suisse de Cartographie de la Faune		Müller, Andreas
Osmia uncinata Gerstäcker, 1869	Switzerland	Zürich	Rheinau, Strickboden	47.6118	8.59667	360	2009-05-07	0	1	Oertli, Sabine		Centre Suisse de Cartographie de la Faune
Osmia uncinata Gerstäcker, 1869	Switzerland	Zürich	Stallikon, Unteres Reppischtal	47.316	8.48442		1980-04-13	1	0	Müller, Peter	Müller, Peter	Centre Suisse de Cartographie de la Faune		Herrmann, Mike
Osmia uncinata Gerstäcker, 1869	Switzerland	Zürich	Wädenswil, Halbinsel Au	47.248	8.64831	410	2019-03-22	0	1	Heller, P.		Müller, Andreas		Müller, Andreas
Osmia uncinata Gerstäcker, 1869	Switzerland	Zürich	Weiach, Magerwiese vor Waldrand	47.5503	8.43589	780	2005-06-03	0	1	Herrmann, Mike	Herrmann, Mike	Centre Suisse de Cartographie de la Faune		Herrmann, Mike
Osmia uncinata Gerstäcker, 1869	Switzerland	Zürich	Will, Kiesgrube Gentner	47.5857	8.50303	400	2002-06-14	0	1		Eidgenössische Technische Hochschule Zürich (ETH)	Centre Suisse de Cartographie de la Faune		Müller, Andreas
Osmia uncinata Gerstäcker, 1869	Ukraine		Kiev region	50.4498	30.5313		00.00.1995	0	0			Romasenko, L. P. (1995): Comparative characteristics of fauna of megachilid bees of reservations and other territories of Ukraine. In: Banaszak, J. (Ed.) Changes in the Fauna of Wild Bees in Europe. Pedagogical University, Bydgoszcz, pp. 65-74.
